# Supplementary material for: Unraveling Signatures of Local Adaptation among Indigenous Groups from Mexico
Source: MDPI journal article supplement (doi:10.3390/genes13122251), 2022-11-30
Supplement: s1 [file s1]

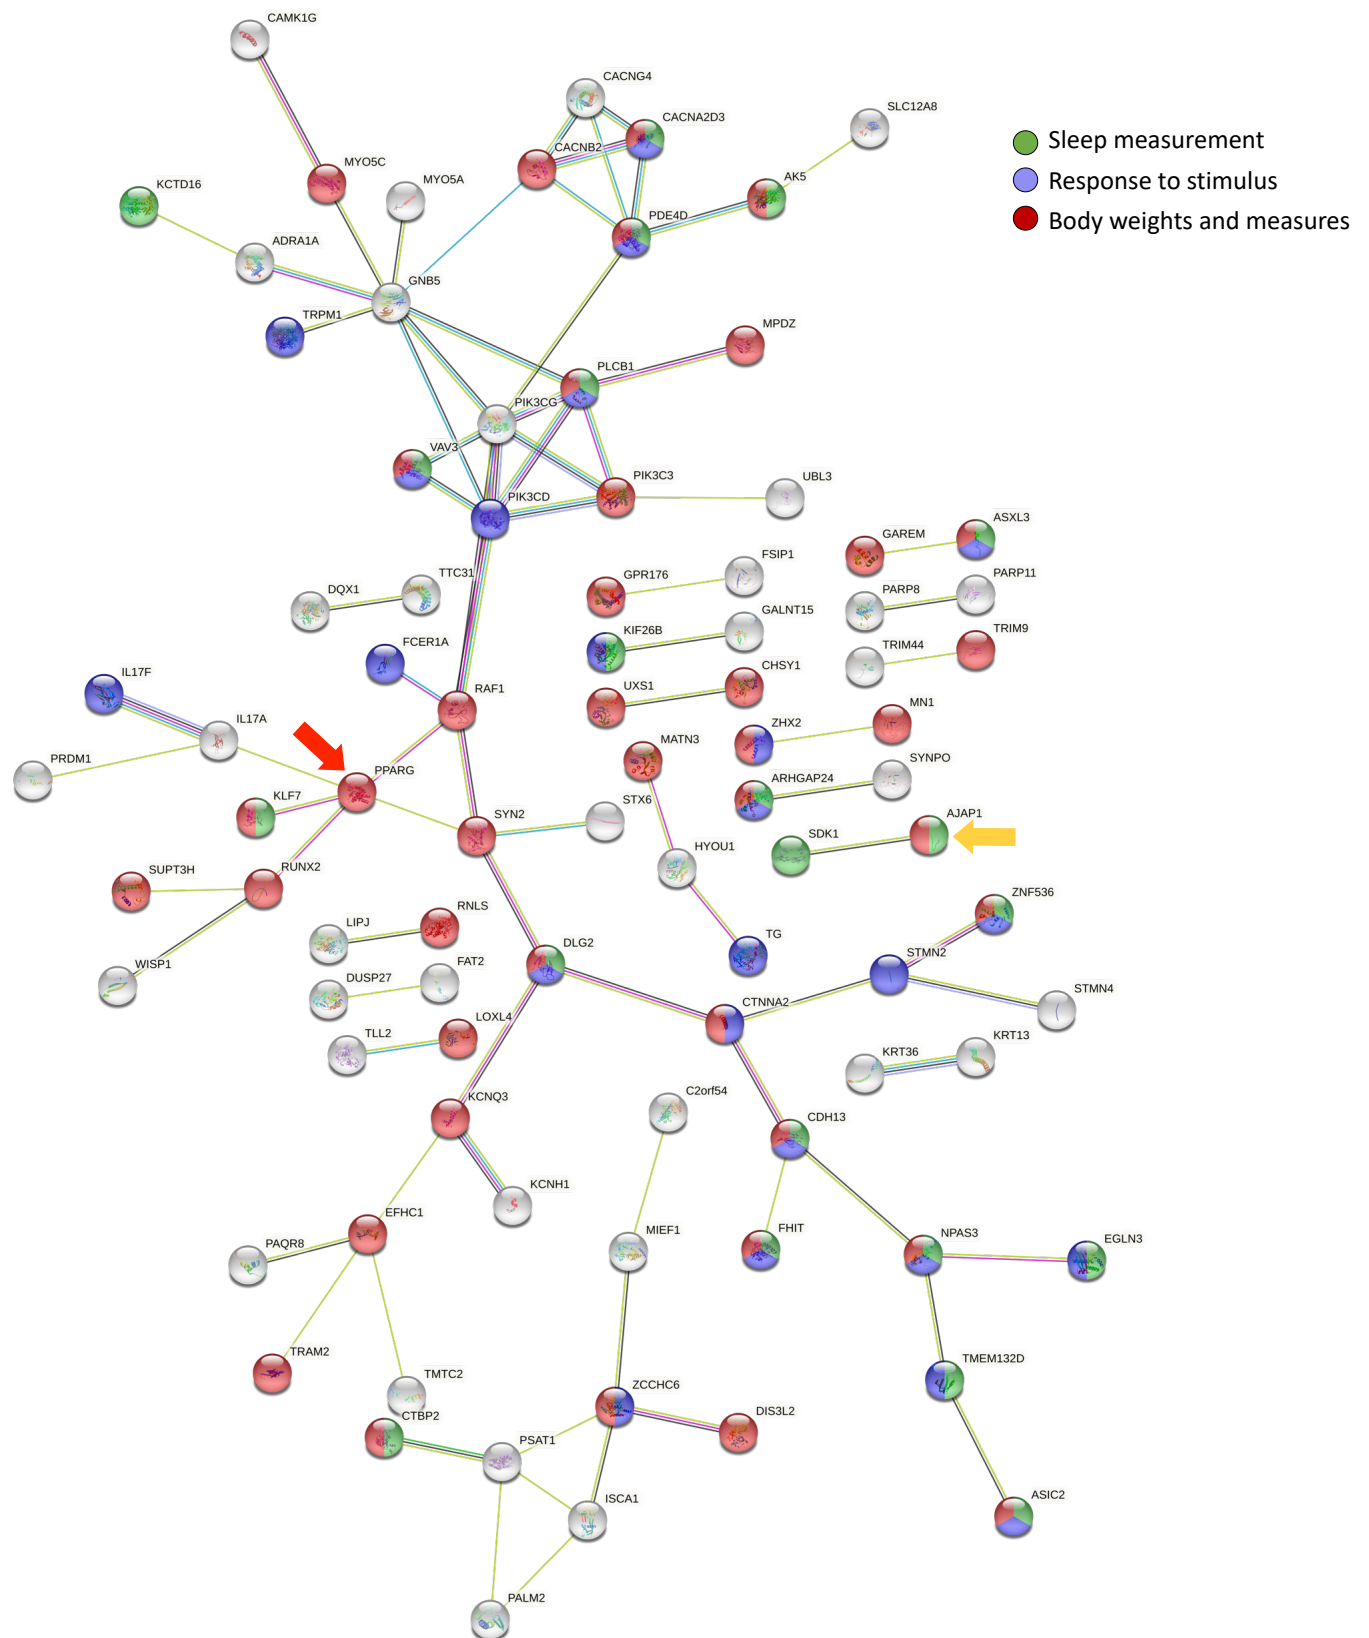

Figure S1. PPI network for genes under selection identified in the North.

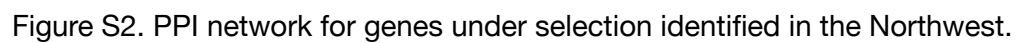



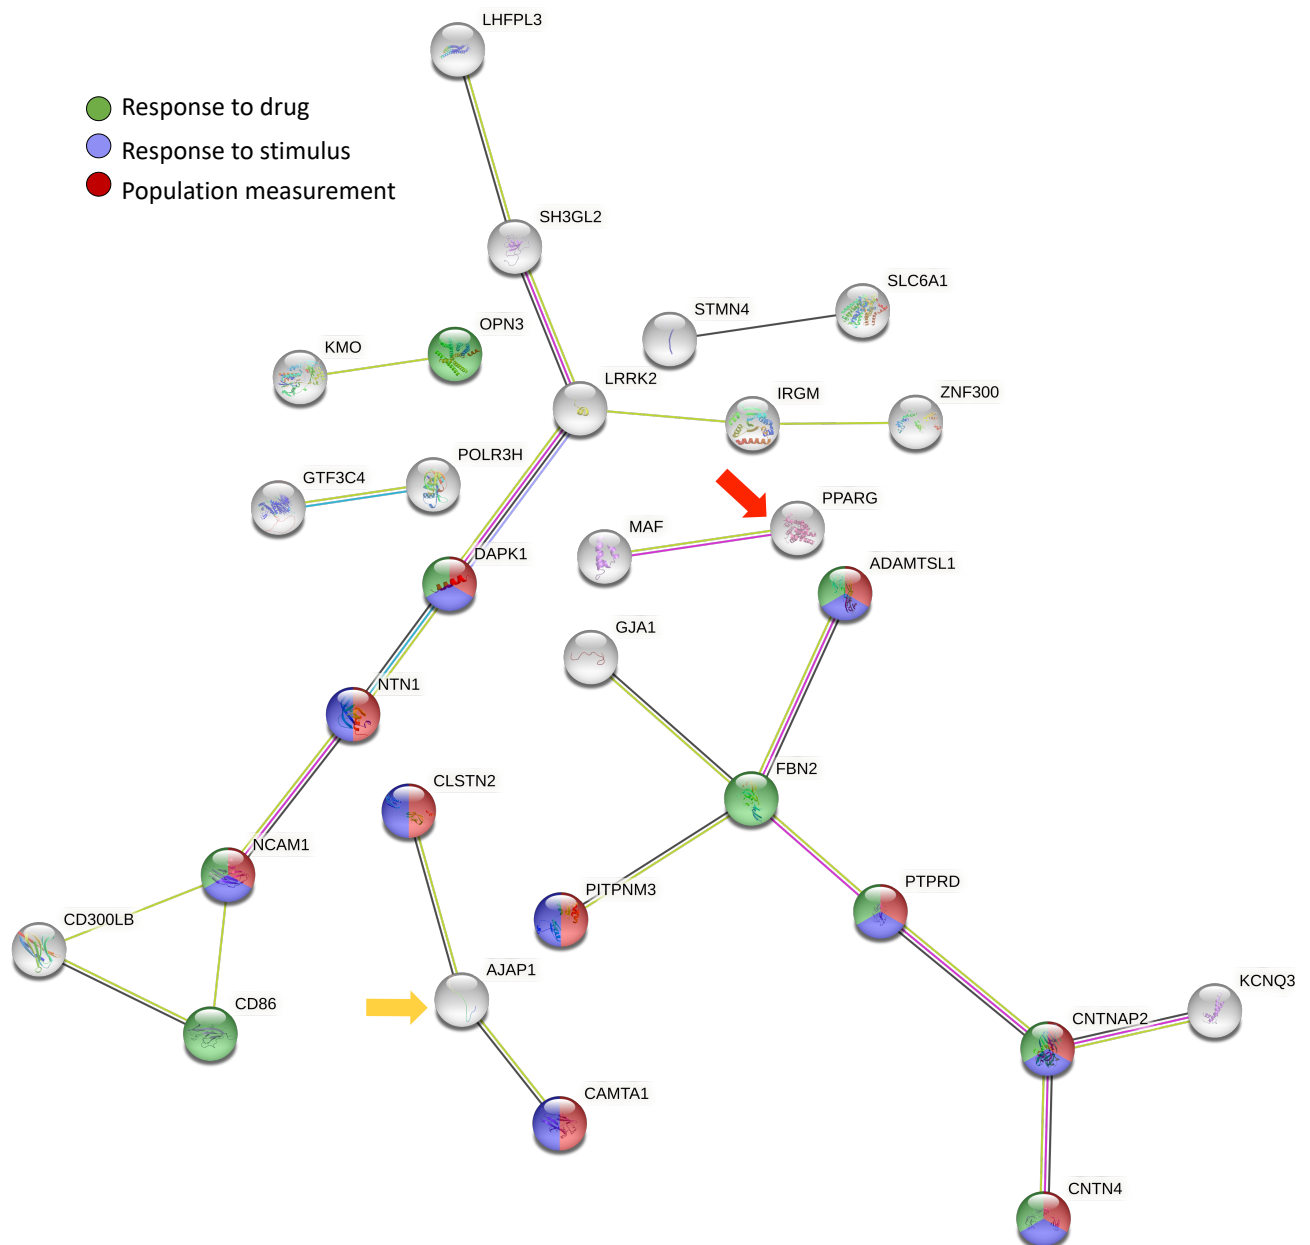

Figure S4. PPI network for genes under selection identified in the South.



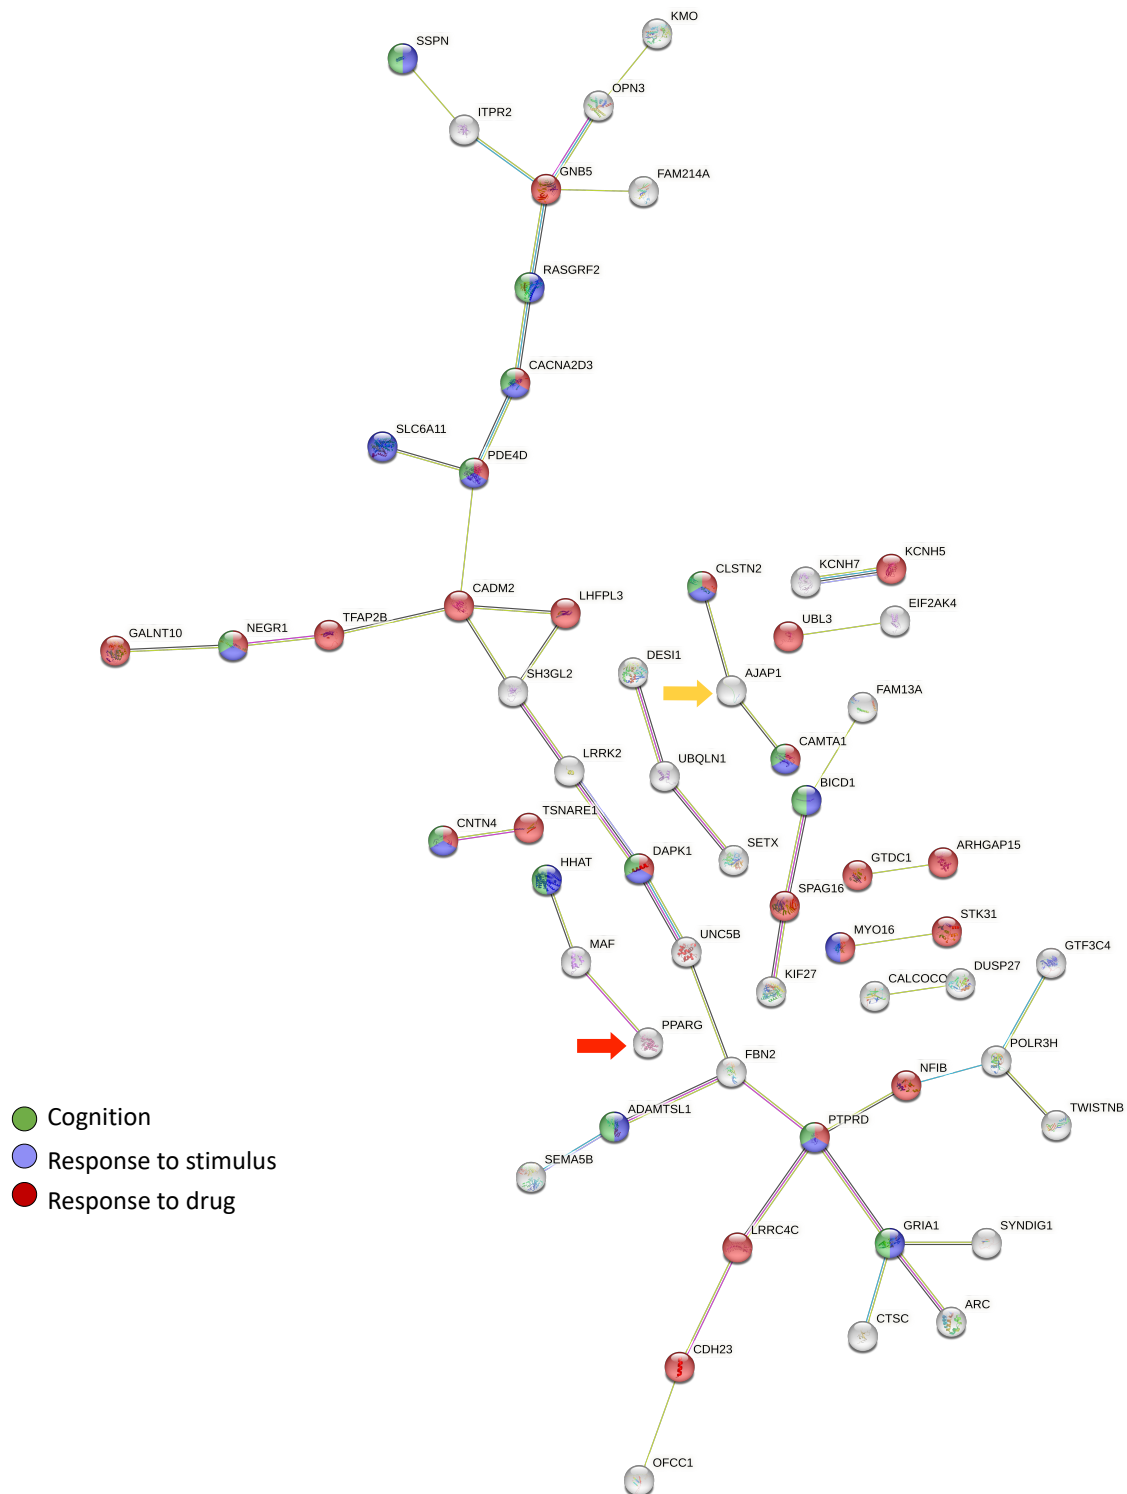

Figure S5. PPI network for genes under selection identified in the Southeast.
