# Supplementary material for: Unraveling Signatures of Local Adaptation among Indigenous Groups from Mexico
Source: Genes (Basel). 2022 Nov 30;13(12):2251. doi: 10.3390/genes13122251 (PMC9778281; doi:10.3390/genes13122251)
Supplement: Supplementary file 1 [file genes-13-02251-s001.zip › Supplementary_Tables_Nov.xlsx]

## Sheet: Table S1
Table S1: Population size by region and ethnic group
Region (N)	Ethnic Group	n
North (51)	Cucapa	1
	Guarijio	10
	Seri	10
	Pima	1
	Tarahumara	29
Northwest (26)	Cora	3
	Huichol	10
	Mexicanero	9
	Tepehuano	4
Center (83)	Huasteco	9
	Matlaltzinca	7
	Mazahua	5
	Nahuatl_Mor	9
	Nahuatl_Pue	3
	Nahuatl_SLP	7
	Otomi_Hgo	21
	Pame	4
	Popoloca	2
	Totonaco_Pue	11
	Totonaco_Ver	5
South (71)	Chinanteco	7
	Popoluca_Sierra	6
	Nahuatl_Ver	2
	Chocholteco	1
	Chontal_Oax	1
	Cuicateco	1
	Huave	1
	Mazateco_Oax	5
	Mazateco_Pue	9
	Mixteco_alto	11
	Mixteco_costa	10
	Tlapaneco	2
	Mixe	6
	Triqui	3
	Zapoteco	6
Southeast (94)	Awakateko	1
	Chol	6
	Chuj	10
	Ixil	1
	Jakalteko	2
	Kanjobal	10
	Kaqchiquel	2
	Kekchi	2
	Lacandon	7
	Mame	6
	Maya_Camp	1
	Maya_Yuc	10
	Mocho	4
	Tojolabal	4
	Tzeltal	10
	Tzotzil	13
	Zoque	5

## Sheet: Table S2
Table S2: Candidate genes under selection in the North region
Chromosome	Hg37 position	rs	Reference Allele	Alternate Allele	PBS	iHS	Gene Symbol	Gene name	MAIS minor allele freq
1	4543242	rs16839093	T	A	0.382491	2.26372	LINC01777	long intergenic non-protein coding RNA 1777	0.3784
1	4723842	rs12083135	A	G	0.606801	3.58583	AJAP1	adherens junctions associated protein 1	0.4485
1	4723917	rs10915578	G	A	0.444557	3.58583	AJAP1	adherens junctions associated protein 1	0.4284
1	4724048	rs17455108	G	A	0.606801	3.61412	AJAP1	adherens junctions associated protein 1	0.45
1	4732334	rs1564666	G	A	0.535772	3.80253	AJAP1	adherens junctions associated protein 1	0.4588
1	4747737	rs12747700	A	G	0.385276	2.27471	AJAP1	adherens junctions associated protein 1	0.347
1	9725525	rs4300218	G	A	0.308428	2.45815	PIK3CD	phosphatidylinositol-45-bisphosphate 3-kinase catalytic subunit delta	0.2955
1	73236014	rs2764508	C	T	0.436596	2.31534	LOC339468	uncharacterized LOC339468	0.3818
1	77896355	rs12033923	T	C	0.279882	2.18486	AK5	adenylate kinase 5	0.2818
1	108124480	rs17477236	C	A	0.293354	2.33224	VAV3	vav guanine nucleotide exchange factor 3	0.1621
1	108222466	rs17539492	T	G	0.305071	2.17986	VAV3	vav guanine nucleotide exchange factor 3	0.153
1	108745239	rs6686613	G	C	0.279712	2.50135	NBPF4	NBPF member 4	0.1353
1	108745673	rs17021210	C	G	0.279712	2.50135	NBPF4	NBPF member 4	0.1348
1	111756707	rs1886652	C	T	0.295041	2.74165	CHI3L2	chitinase 3 like 2	0.4634
1	111762881	rs2484460	C	T	0.348425	2.74165	CHI3L2	chitinase 3 like 2	0.4649
1	111780604	rs6685226	G	A	0.33761	2.80873	CHI3L2	chitinase 3 like 2	0.4649
1	156240835	rs16837272	C	A	0.282796	1.98062	SMG5	SMG5 nonsense mediated mRNA decay factor	0.4682
1	159273041	rs2427828	G	A	0.391618	2.20855	FCER1A	Fc fragment of IgE receptor Ia	0.4364
1	167076534	rs6427063	T	C	0.288909	2.05328	DUSP27	dual specificity phosphatase 27 atypical	0.2061
1	180919255	rs2297185	T	C	0.288495	1.98087	STX6	syntaxin 6	0.4695
1	182114569	rs10911024	A	G	0.340432	2.18702	LINC01344	long intergenic non-protein coding RNA 1344	0.4727
1	182131294	rs10911029	A	G	0.336035	2.13174	LINC01344	long intergenic non-protein coding RNA 1344	0.4742
1	209759971	rs17014838	T	A	0.377844	2.20822	CAMK1G	calcium/calmodulin dependent protein kinase IG	0.4576
1	210930809	rs2185385	A	G	0.373255	2.18277	KCNH1	potassium voltage-gated channel subfamily H member 1	0.4424
1	210993071	rs1418971	C	T	0.508846	2.19499	KCNH1	potassium voltage-gated channel subfamily H member 1	0.4864
1	211008695	rs6540626	C	T	0.455178	2.24148	KCNH1	potassium voltage-gated channel subfamily H member 1	0.4788
1	211014671	rs6540630	G	A	0.455178	2.24148	KCNH1	potassium voltage-gated channel subfamily H member 1	0.4773
1	211024365	rs2357922	G	A	0.455178	2.19082	KCNH1	potassium voltage-gated channel subfamily H member 1	0.4773
1	211024612	rs2884335	C	T	0.455178	2.19082	KCNH1	potassium voltage-gated channel subfamily H member 1	0.4741
1	211026944	rs6540631	G	A	0.455178	2.19082	KCNH1	potassium voltage-gated channel subfamily H member 1	0.4788
1	231070241	rs17734675	T	C	0.301145	2.54414	TTC13	tetratricopeptide repeat domain 13	0.3682
1	234795863	rs611634	C	A	0.28479	2.34711	LOC101927787	uncharacterized LOC101927787	0.3541
1	245358659	rs11582977	C	T	0.325695	2.65495	KIF26B	kinesin family member 26B	0.4106
1	245367534	rs6684360	T	C	0.298805	2.06135	KIF26B	kinesin family member 26B	0.3197
1	245396150	rs3124447	T	C	0.304894	2.28094	KIF26B	kinesin family member 26B	0.2994
1	245406293	rs2941280	T	A	0.373593	2.12843	KIF26B	kinesin family member 26B	0.3061
2	20202811	rs11681705	A	G	0.385366	2.51056	MATN3	matrilin 3	0.2903
2	74690378	rs1063588	C	T	0.530432	2.23323	MOGS	mannosyl-oligosaccharide glucosidase	0.3136
2	74722170	rs3755445	G	A	0.506188	2.23323	TTC31	tetratricopeptide repeat domain 31	0.3121
2	74746080	rs6709863	C	T	0.494484	2.24796	DQX1	DEAQ-box RNA dependent ATPase 1	0.3121
2	74746322	rs6546909	A	T	0.494484	2.24796	DQX1	DEAQ-box RNA dependent ATPase 1	0.3152
2	74920823	rs11691947	T	G	0.461773	2.0226	SEMA4F	semaphorin 4F	0.3136
2	74926935	rs7355739	A	C	0.461773	2.0226	SEMA4F	semaphorin 4F	0.3136
2	74927197	rs2041835	A	G	0.454793	2.0226	SEMA4F	semaphorin 4F	0.3136
2	74928350	rs363620	C	A	0.461773	2.0226	SEMA4F	semaphorin 4F	0.3167
2	74929490	rs11126440	A	G	0.461773	2.0226	SEMA4F	semaphorin 4F	0.3167
2	74930842	rs363624	A	G	0.461773	2.0226	SEMA4F	semaphorin 4F	0.3167
2	74930899	rs363625	A	G	0.461773	2.0226	SEMA4F	semaphorin 4F	0.3167
2	74938531	rs205645	A	G	0.476241	2.0226	SEMA4F	semaphorin 4F	0.3242
2	74950067	rs205638	G	A	0.422384	2.06984	SEMA4F	semaphorin 4F	0.3182
2	74951336	rs205636	T	C	0.422384	2.06984	SEMA4F	semaphorin 4F	0.3182
2	79420601	rs11126704	T	C	0.365668	2.54052	CTNNA2	catenin alpha 2	0.2477
2	79424861	rs12477301	G	A	0.373916	2.37168	CTNNA2	catenin alpha 2	0.25
2	106762785	rs3860450	T	A	0.282852	2.48953	UXS1	UDP-glucuronate decarboxylase 1	0.4009
2	118926955	rs13025020	A	G	0.349202	2.16349	THORLNC	testis associated oncogenic lncRNA	0.383
2	207936799	rs1019400	A	G	0.29203	2.48751	CPO	carboxypeptidase O	0.297
2	207946885	rs1263597	C	G	0.304082	2.48751	KLF7	Kruppel like factor 7	0.303
2	233166007	rs12467219	G	A	0.576509	2.2501	DIS3L2	DIS3 like 3'-5' exoribonuclease 2	0.2857
2	241846140	rs4076342	T	C	0.342976	1.98027	MAB21L4	mab-21 like 4	0.2455
3	12007910	rs438129	T	C	0.315701	2.67791	SYN2	synapsin II	0.3182
3	12426936	rs10510419	T	G	0.306171	2.45622	PPARG	peroxisome proliferator activated receptor gamma	0.4803
3	12468589	rs13099828	G	C	0.349367	2.41766	PPARG	peroxisome proliferator activated receptor gamma	0.4697
3	12471330	rs6782475	G	T	0.331713	2.51172	PPARG	peroxisome proliferator activated receptor gamma	0.4696
3	12477055	rs1152003	G	C	0.298111	2.50588	PPARG	peroxisome proliferator activated receptor gamma	0.2848
3	12478817	rs9833097	A	G	0.511446	3.44629	PPARG	peroxisome proliferator activated receptor gamma	0.4544
3	12484985	rs13090265	G	A	0.511446	3.02207	PPARG	peroxisome proliferator activated receptor gamma	0.4561
3	12494794	rs2249407	C	A	0.511279	2.49689	PPARG	peroxisome proliferator activated receptor gamma	0.4318
3	12514569	rs709163	A	G	0.344361	2.19996	PPARG	peroxisome proliferator activated receptor gamma	0.3591
3	12523604	rs17279604	C	G	0.425495	2.35181	PPARG	peroxisome proliferator activated receptor gamma	0.4724
3	12533148	rs17036821	T	G	0.421007	2.35181	TSEN2	tRNA splicing endonuclease subunit 2	0.4682
3	12550199	rs4684106	G	A	0.417839	2.39855	TSEN2	tRNA splicing endonuclease subunit 2	0.4652
3	12581592	rs13069599	T	C	0.394258	2.3794	MKRN2OS	MKRN2 opposite stry	0.4573
3	12656590	rs4684865	C	G	0.33827	2.37872	RAF1	Raf-1 proto-oncogene serine/threonine kinase	0.4485
3	12707776	rs9861472	T	A	0.295832	2.24008	RAF1	Raf-1 proto-oncogene serine/threonine kinase	0.3404
3	12742320	rs13072789	T	A	0.359211	2.2141	TMEM40	transmembrane protein 40	0.4439
3	12742433	rs13072983	G	A	0.526848	2.36911	TMEM40	transmembrane protein 40	0.4364
3	16068354	rs9815997	T	C	0.308263	2.079	GALNT15	polypeptide N-acetylgalactosaminyltransferase 15	0.3955
3	32348341	rs12497324	A	G	0.315685	2.48951	CMTM8	CKLF like MARVEL transmembrane domain containing 8	0.3061
3	55064184	rs3773557	G	T	0.297976	2.09352	CACNA2D3	calcium voltage-gated channel auxiliary subunit alpha2delta 3	0.3982
3	55071505	rs3773544	G	A	0.297976	2.12919	CACNA2D3	calcium voltage-gated channel auxiliary subunit alpha2delta 3	0.4121
3	60441341	rs1947162	G	C	0.287981	2.15802	FHIT	fragile histidine triad	0.4788
3	60448671	rs9809480	C	T	0.287981	2.27109	FHIT	fragile histidine triad	0.4758
3	107594466	rs13317948	C	T	0.314462	2.8886	LINC00635	long intergenic non-protein coding RNA 635	0.2242
3	124869928	rs679990	T	C	0.414682	2.43351	SLC12A8	solute carrier family 12 member 8	0.2652
3	125385039	rs6799729	G	A	0.282781	2.30344	OSBPL11	oxysterol binding protein like 11	0.2015
3	193931183	rs4078029	G	A	0.369706	1.99039	LINC02036	long intergenic non-protein coding RNA 2036	0.3394
4	46494121	rs12510295	G	A	0.318123	2.4276	GABRA2	gamma-aminobutyric acid type A receptor alpha2 subunit	0.3258
4	86440815	rs17010313	G	A	0.351886	2.03042	ARHGAP24	Rho GTPase activating protein 24	0.3318
4	89730986	rs17014602	G	C	0.321509	2.29504	FAM13A	family with sequence similarity 13 member A	0.4258
4	117792540	rs12511726	T	G	0.403358	2.41042	TRAM1L1	translocation associated membrane protein 1 like 1	0.4364
4	117792981	rs12508641	G	A	0.387422	2.45147	TRAM1L1	translocation associated membrane protein 1 like 1	0.4329
4	117795282	rs12505094	C	T	0.403358	2.40534	TRAM1L1	translocation associated membrane protein 1 like 1	0.4392
4	177489460	rs1449726	G	T	0.278217	2.37893	SPCS3	signal peptidase complex subunit 3	0.2568
5	50148281	rs27725	A	G	0.391618	2.19172	PARP8	poly(ADP-ribose) polymerase family member 8	0.269
5	58572001	rs6877508	G	A	0.301335	2.45326	PDE4D	phosphodieastrase 4D	0.3399
5	59242499	rs17374354	C	T	0.380982	2.42173	PDE4D	phosphodieastrase 4D	0.303
5	59278969	rs17315957	T	C	0.399115	2.68502	PDE4D	phosphodieastrase 4D	0.31
5	59308516	rs12517747	T	C	0.448232	2.97617	PDE4D	phosphodieastrase 4D	0.303
5	59309162	rs952110	A	G	0.448232	2.97617	PDE4D	phosphodieastrase 4D	0.303
5	59455212	rs996234	A	G	0.330234	2.82439	PDE4D	phosphodieastrase 4D	0.2955
5	109392612	rs1013458	T	C	0.282262	2.58839	TMEM232	transmembrane protein 232	0.4455
5	127683212	rs255691	G	A	0.317699	3.13889	FBN2	fibrillin 2	0.3985
5	127686378	rs151987	T	C	0.326013	3.03311	FBN2	fibrillin 2	0.3921
5	127724092	rs331071	A	T	0.380374	2.66594	FBN2	fibrillin 2	0.4255
5	143901004	rs358660	G	A	0.582451	2.66818	KCTD16	potassium channel tetramerization domain containing 16	0.4788
5	143901489	rs358661	G	T	0.537995	2.66818	KCTD16	potassium channel tetramerization domain containing 16	0.4909
5	149992045	rs752922	A	G	0.383215	2.0293	SYNPO	synaptopodin	0.4091
5	150930186	rs2278370	T	C	0.50876	2.24921	FAT2	FAT atypical cadherin 2	0.3545
5	150954648	rs4958460	G	A	0.374551	2.06471	FAT2	FAT atypical cadherin 2	0.3754
5	176105540	rs4868692	G	A	0.363677	2.0109	TSPAN17	tetraspanin 17	0.4015
6	6164208	rs4416719	T	A	0.498458	2.49472	F13A1	coagulation factor XIII A chain	0.3621
6	16384665	rs7738608	C	T	0.342939	2.15215	ATXN1	ataxin 1	0.4939
6	16384727	rs7758453	A	C	0.342939	2.15215	ATXN1	ataxin 1	0.4924
6	44925834	rs3799987	A	G	0.366632	2.03927	SUPT3H	SPT3 homolog SAGA y STAGA complex component	0.4164
6	44931331	rs1360195	C	G	0.366632	2.03927	SUPT3H	SPT3 homolog SAGA y STAGA complex component	0.4212
6	45214677	rs9472453	T	A	0.373223	2.08295	SUPT3H	SPT3 homolog SAGA y STAGA complex component	0.4162
6	45291381	rs4590263	A	G	0.373223	2.11403	SUPT3H	SPT3 homolog SAGA y STAGA complex component	0.4136
6	45329193	rs16873366	G	A	0.373223	2.10867	SUPT3H	SPT3 homolog SAGA y STAGA complex component	0.4136
6	45332305	rs6932926	G	A	0.373223	2.10867	SUPT3H	SPT3 homolog SAGA y STAGA complex component	0.4136
6	45335701	rs16873373	G	T	0.373223	2.10867	RUNX2	runt related transcription factor 2	0.4136
6	45343871	rs4714853	C	T	0.373223	2.10867	RUNX2	runt related transcription factor 2	0.4121
6	45349497	rs35565233	A	G	0.35045	2.10867	RUNX2	runt related transcription factor 2	0.4146
6	52095900	rs1266818	T	C	0.316207	2.5585	IL17A	interleukin 17A	0.2273
6	52108062	rs1266828	G	A	0.288241	2.5585	IL17F	interleukin 17F	0.2136
6	52245415	rs4712006	C	T	0.331116	2.85421	PAQR8	progestin y adipoQ receptor family member 8	0.3021
6	52266587	rs16882478	A	G	0.37081	2.86203	PAQR8	progestin y adipoQ receptor family member 8	0.3076
6	52362035	rs9370125	T	C	0.324438	2.81988	EFHC1	EF-hy domain containing 1	0.3161
6	52373456	rs7748569	T	A	0.324438	2.81958	TRAM2	translocation associated membrane protein 2	0.3091
6	80379611	rs12529674	C	A	0.340242	2.3503	SH3BGRL2	SH3 domain binding glutamate rich protein like 2	0.247
6	106627910	rs9398071	C	T	0.416757	2.92161	PRDM1	PR/SET domain 1	0.439
6	114239000	rs498519	C	G	0.304665	2.02335	FLJ34503	uncharacterized FLJ34503	0.3924
6	114240685	rs352092	T	C	0.522944	2.59899	FLJ34503	uncharacterized FLJ34503	0.4333
6	114246507	rs352066	G	A	0.286378	2.08419	FLJ34503	uncharacterized FLJ34503	0.3936
6	123033198	rs4945708	A	G	0.314077	3.32539	PKIB	cAMP-dependent protein kinase inhibitor beta	0.3587
7	4028716	rs7795699	C	G	0.333193	2.53215	SDK1	sidekick cell adhesion molecule 1	0.4424
7	4033561	rs1025915	A	G	0.350973	2.50075	SDK1	sidekick cell adhesion molecule 1	0.4409
7	4033680	rs1025914	G	A	0.325963	2.50075	SDK1	sidekick cell adhesion molecule 1	0.4375
7	106446811	rs17153476	T	C	0.295094	2.29857	PIK3CG	phosphatidylinositol-45-bisphosphate 3-kinase catalytic subunit gamma	0.2182
7	148309264	rs12704040	C	G	0.339415	2.10416	C7orf33	chromosome 7 open reading frame 33	0.4652
8	26862373	rs1996396	G	A	0.347443	2.33986	ADRA1A	adrenoceptor alpha 1A	0.4667
8	26863433	rs13268730	T	C	0.383935	2.33531	ADRA1A	adrenoceptor alpha 1A	0.4667
8	27101279	rs3739214	T	C	0.350595	2.16239	STMN4	stathmin 4	0.3636
8	55290604	rs7845242	G	C	0.363345	4.49421	RNU105C	RNA U105C small nucleolar	0.4
8	71564582	rs406703	G	A	0.334539	2.87487	LACTB2	lactamase beta 2	0.2909
8	75630494	rs11985065	A	G	0.305559	2.87162	MIR2052HG	MIR2052 host gene	0.197
8	80643439	rs4433192	C	A	0.358765	4.11881	STMN2	stathmin 2	0.2121
8	123969422	rs16897805	G	C	0.298202	2.1358	ZHX2	zinc fingers y homeoboxes 2	0.2128
8	123984869	rs17370786	G	A	0.278009	2.27794	ZHX2	zinc fingers y homeoboxes 2	0.2082
8	123987971	rs17311700	T	C	0.278009	2.27794	ZHX2	zinc fingers y homeoboxes 2	0.2076
8	133341012	rs876110	T	C	0.421514	3.18324	KCNQ3	potassium voltage-gated channel subfamily Q member 3	0.4331
8	134138581	rs4297024	G	A	0.372341	2.60154	TG	thyroglobulin	0.3663
8	134247127	rs13263504	G	A	0.547452	2.71194	CCN4	cellular communication network factor 4	0.4636
9	13084183	rs10738318	T	C	0.289335	2.09775	MPDZ	multiple PDZ domain crumbs cell polarity complex component	0.2242
9	79375027	rs17784809	A	C	0.413913	2.57546	PRUNE2	prune homolog 2 with BCH domain	0.2561
9	79375371	rs670879	T	G	0.410881	2.56176	PRUNE2	prune homolog 2 with BCH domain	0.2546
9	79387149	rs10119901	G	A	0.404939	2.51319	PRUNE2	prune homolog 2 with BCH domain	0.253
9	80942264	rs7038086	T	A	0.34049	1.97849	PSAT1	phosphoserine aminotransferase 1	0.4833
9	80943620	rs10780231	T	C	0.335539	1.97849	PSAT1	phosphoserine aminotransferase 1	0.4833
9	88893891	rs2147064	T	C	0.2789	2.19965	ISCA1	iron-sulfur cluster assembly 1	0.2197
9	88906695	rs10868406	G	C	0.2789	2.19965	TUT7	terminal uridylyl transferase 7	0.2197
9	88937617	rs700768	T	A	0.2789	2.28843	TUT7	terminal uridylyl transferase 7	0.2197
9	88948401	rs791221	G	C	0.2789	2.28843	TUT7	terminal uridylyl transferase 7	0.2197
9	88953554	rs791321	C	T	0.2789	2.19232	TUT7	terminal uridylyl transferase 7	0.2197
9	105993267	rs1176191	C	T	0.382255	2.56293	LINC01492	long intergenic non-protein coding RNA 1492	0.09451
9	112353047	rs7030024	T	C	0.334279	2.41321	PALM2	paralemmin 2	0.3404
9	112353340	rs7044698	A	G	0.334279	2.41321	PALM2	paralemmin 2	0.3394
10	5273767	rs2104994	A	G	0.290947	2.06709	AKR1C4	aldo-keto reductase family 1 member C4	0.4818
10	18379931	rs1547819	C	A	0.414031	2.11168	CACNB2	calcium voltage-gated channel auxiliary subunit beta 2	0.2364
10	90047709	rs2162361	C	T	0.40764	2.31276	RNLS	renalase FAD dependent amine oxidase	0.3652
10	90363007	rs10887840	A	G	0.316473	2.36921	LIPJ	lipase family member J	0.4345
10	90363908	rs10887841	A	G	0.345732	2.36921	LIPJ	lipase family member J	0.4331
10	90365290	rs2274312	G	A	0.353922	2.36921	LIPJ	lipase family member J	0.4318
10	90367890	rs7071218	G	A	0.316473	2.36921	LIPJ	lipase family member J	0.4284
10	98238595	rs11188783	A	T	0.333683	2.10095	TLL2	tolloid like 2	0.4742
10	98242457	rs11188784	G	A	0.333683	2.10095	TLL2	tolloid like 2	0.4742
10	98263545	rs879266	A	G	0.333565	2.08311	TLL2	tolloid like 2	0.4817
10	100082956	rs4917815	C	T	0.34443	2.44832	LOXL4	lysyl oxidase like 4	0.2173
10	100088262	rs4919210	T	C	0.35938	2.81671	LOXL4	lysyl oxidase like 4	0.2197
10	100099651	rs17109450	T	G	0.390092	2.23777	LOXL4	lysyl oxidase like 4	0.2219
10	126844505	rs11245522	C	T	0.277482	2.41383	CTBP2	C-terminal binding protein 2	0.3963
11	6688808	rs11512422	G	A	0.304306	2.05829	MRPL17	mitochondrial ribosomal protein L17	0.347
11	6700602	rs1111585	T	G	0.337776	2.29432	MRPL17	mitochondrial ribosomal protein L17	0.272
11	6816778	rs866347	A	G	0.292131	2.07872	OR6A2	olfactory receptor family 6 subfamily A member 2	0.2766
11	32098753	rs640311	T	A	0.284845	2.34641	RCN1	reticulocalbin 1	0.2606
11	32101281	rs477838	A	G	0.300388	2.34641	RCN1	reticulocalbin 1	0.2545
11	32103274	rs2474162	C	G	0.288257	2.34641	RCN1	reticulocalbin 1	0.2561
11	35788567	rs2970330	T	G	0.325886	2.51107	TRIM44	tripartite motif containing 44	0.3909
11	61390368	rs1495941	T	C	0.300869	2.01936	RPLP0P2	ribosomal protein lateral stalk subunit P0 pseudogene 2	0.4318
11	84775335	rs641655	T	C	0.552802	2.18019	DLG2	discs large MAGUK scaffold protein 2	0.4438
11	84812001	rs349083	A	G	0.29921	2.24044	DLG2	discs large MAGUK scaffold protein 2	0.3232
11	88139680	rs16913902	T	C	0.545216	3.26498	CTSC	cathepsin C	0.3
11	118919206	rs568922	T	C	0.328433	2.19308	HYOU1	hypoxia up-regulated 1	0.303
11	118920453	rs673768	T	C	0.328732	2.07117	HYOU1	hypoxia up-regulated 1	0.3055
11	118924212	rs470324	A	G	0.328433	2.19391	HYOU1	hypoxia up-regulated 1	0.3024
11	118931099	rs620331	T	C	0.350022	2.19391	HYOU1	hypoxia up-regulated 1	0.3024
11	118932320	rs582688	C	T	0.325307	2.19391	HYOU1	hypoxia up-regulated 1	0.3024
11	118932445	rs636283	T	C	0.328433	2.19391	HYOU1	hypoxia up-regulated 1	0.3015
12	3909911	rs7967486	A	G	0.346792	2.00735	PARP11	poly(ADP-ribose) polymerase family member 11	0.3258
12	3910192	rs7967830	A	G	0.51857	2.00735	PARP11	poly(ADP-ribose) polymerase family member 11	0.3273
12	3918300	rs758799	T	G	0.647042	2.06362	PARP11	poly(ADP-ribose) polymerase family member 11	0.3303
12	13204276	rs950671	G	C	0.349252	2.00122	FAM234B	family with sequence similarity 234 member B	0.4787
12	25655660	rs7967383	A	C	0.292338	1.99966	LMNTD1	lamin tail domain containing 1	0.253
12	32144484	rs10771897	G	A	0.289555	2.19236	RESF1	retroelement silencing factor 1	0.436
12	45155399	rs10785527	C	G	0.29363	2.29307	NELL2	neural EGFL like 2	0.3121
12	71029283	rs17226486	T	C	0.340107	2.1712	PTPRB	protein tyrosine phosphatase receptor type B	0.08333
12	83453620	rs12582321	C	T	0.547995	2.21397	TMTC2	transmembrane y tetratricopeptide repeat containing 2	0.4119
12	92860563	rs552398	A	G	0.301093	4.31533	LINC02397	long intergenic non-protein coding RNA 2397	0.3364
12	103164678	rs1357767	G	A	0.425299	2.15193	LINC00485	long intergenic non-protein coding RNA 485	0.4605
12	103192502	rs2254427	A	G	0.73798	2.57274	LINC00485	long intergenic non-protein coding RNA 485	0.3967
12	103199803	rs1718295	G	C	0.67556	2.75671	LINC00485	long intergenic non-protein coding RNA 485	0.3894
12	129792066	rs3912817	C	A	0.278318	2.11718	TMEM132D	transmembrane protein 132D	0.3537
12	129796484	rs10847829	G	A	0.294112	2.31977	TMEM132D	transmembrane protein 132D	0.3465
13	20630521	rs12430134	A	G	0.285897	2.07286	ZMYM2	zinc finger MyM-type containing 2	0.4588
13	20652752	rs11618347	A	G	0.282963	2.06127	ZMYM2	zinc finger MyM-type containing 2	0.4576
13	30303093	rs1359859	C	T	0.312189	2.15368	UBL3	ubiquitin like 3	0.2152
13	43616658	rs9533356	C	G	0.323911	2.09734	DNAJC15	DnaJ heat shock protein family (Hsp40) member C15	0.4576
13	43688916	rs11618074	A	G	0.321818	2.07428	DNAJC15	DnaJ heat shock protein family (Hsp40) member C15	0.4559
13	43693165	rs12430937	G	A	0.307868	1.97863	DNAJC15	DnaJ heat shock protein family (Hsp40) member C15	0.4545
13	43727706	rs1324014	A	G	0.293386	2.09384	DNAJC15	DnaJ heat shock protein family (Hsp40) member C15	0.4529
13	54711236	rs2784568	G	T	0.29561	3.25196	LINC00458	long intergenic non-protein coding RNA 458	0.497
13	93562397	rs7325627	C	A	0.329107	2.18258	GPC5	glypican 5	0.3541
13	93563911	rs17188711	C	T	0.329107	2.17444	GPC5	glypican 5	0.353
13	93613682	rs17188760	A	T	0.322984	2.35557	GPC5	glypican 5	0.3379
14	33765935	rs912854	C	T	0.35469	2.79239	NPAS3	neuronal PAS domain protein 3	0.4558
14	33785548	rs1952302	G	A	0.313221	2.50358	NPAS3	neuronal PAS domain protein 3	0.4468
14	34592224	rs17102226	C	T	0.424641	2.13481	EGLN3	egl-9 family hypoxia inducible factor 3	0.155
14	34594507	rs7140186	C	T	0.471713	2.60113	EGLN3	egl-9 family hypoxia inducible factor 3	0.1591
14	51446771	rs1959536	T	G	0.292372	2.29438	TRIM9	tripartite motif containing 9	0.2156
14	57391933	rs709969	C	T	0.31832	2.14108	OTX2-AS1	OTX2 antisense RNA 1 (head to head)	0.4557
14	57444151	rs762097	T	C	0.281732	2.15317	OTX2-AS1	OTX2 antisense RNA 1 (head to head)	0.4788
14	57446703	rs1504606	C	T	0.284461	2.15317	OTX2-AS1	OTX2 antisense RNA 1 (head to head)	0.4787
14	57450349	rs17092622	T	G	0.292729	2.15317	OTX2-AS1	OTX2 antisense RNA 1 (head to head)	0.4772
14	57450468	rs1015547	C	T	0.284601	2.15317	OTX2-AS1	OTX2 antisense RNA 1 (head to head)	0.4788
14	103824721	rs10484071	C	A	0.286799	2.25497	EIF5	eukaryotic translation initiation factor 5	0.1966
15	31419311	rs8031038	G	A	0.474932	2.54305	TRPM1	transient receptor potential cation channel subfamily M member 1	0.4621
15	31421176	rs803533	C	T	0.449755	2.54305	TRPM1	transient receptor potential cation channel subfamily M member 1	0.4606
15	40059535	rs12440567	A	G	0.314773	2.15919	FSIP1	fibrous sheath interacting protein 1	0.2864
15	40176196	rs1836847	C	T	0.286808	2.46948	GPR176	G protein-coupled receptor 176	0.3009
15	52463485	rs12595160	C	A	0.377682	2.28232	GNB5	G protein subunit beta 5	0.4848
15	52528166	rs8031089	A	G	0.276598	2.93636	MYO5C	myosin VC	0.4682
15	52541796	rs4776028	G	A	0.310514	2.38332	MYO5C	myosin VC	0.4924
15	52603363	rs7176482	A	G	0.317217	2.03109	MYO5A	myosin VA	0.4545
15	52641688	rs12324100	T	C	0.337907	1.98414	MYO5A	myosin VA	0.4526
15	52709934	rs1464963	C	T	0.307833	2.08621	MYO5A	myosin VA	0.453
15	52710315	rs10083671	A	G	0.318141	1.99019	MYO5A	myosin VA	0.4757
15	52746861	rs1669867	G	A	0.28939	2.03552	MYO5A	myosin VA	0.462
15	80552023	rs893219	C	T	0.526514	2.24324	LINC00927	long intergenic non-protein coding RNA 927	0.3982
15	80552463	rs2009949	C	A	0.526514	2.24324	LINC00927	long intergenic non-protein coding RNA 927	0.3955
15	101715448	rs4965802	G	A	0.288606	2.20358	CHSY1	chondroitin sulfate synthase 1	0.4909
15	101715520	rs4965803	G	T	0.288606	2.20358	CHSY1	chondroitin sulfate synthase 1	0.4924
16	20312350	rs4780280	C	T	0.279839	2.13186	GP2	glycoprotein 2	0.4697
16	20316862	rs4780875	A	T	0.297919	2.14044	GP2	glycoprotein 2	0.4697
16	20320087	rs4078023	G	T	0.29424	2.14044	GP2	glycoprotein 2	0.4697
16	77421051	rs274540	C	T	0.285586	2.5629	ADAMTS18	ADAM metallopeptidase with thrombospondin type 1 motif 18	0.09091
16	83658857	rs17760896	C	G	0.293726	2.17195	CDH13	cadherin 13	0.247
16	83740179	rs1364118	T	A	0.337513	2.31401	CDH13	cadherin 13	0.2576
17	31853074	rs10512445	T	C	0.30773	2.20715	ASIC2	acid sensing ion channel subunit 2	0.2045
17	31857088	rs17191701	C	T	0.30773	2.20715	ASIC2	acid sensing ion channel subunit 2	0.2045
17	39648257	rs3760521	A	G	0.328296	2.09507	KRT36	keratin 36	0.4012
17	39648944	rs721411	T	C	0.320917	2.23222	KRT13	keratin 13	0.4621
17	64956021	rs7501951	A	G	0.656798	2.39219	CACNG4	calcium voltage-gated channel auxiliary subunit gamma 4	0.4787
17	66314827	rs10445209	T	C	0.328135	2.11247	ARSG	arylsulfatase G	0.3076
18	24141152	rs41370148	T	C	0.365509	2.24221	KCTD1	potassium channel tetramerization domain containing 1	0.1909
18	24393963	rs656741	C	T	0.293851	2.75802	AQP4-AS1	AQP4 antisense RNA 1	0.1636
18	30061838	rs12968086	A	T	0.278665	2.71497	GAREM1	GRB2 associated regulator of MAPK1 subtype 1	0.4281
18	31289841	rs7237757	T	C	0.340609	2.43634	ASXL3	ASXL transcriptional regulator 3	0.2561
18	39114204	rs12455982	G	A	0.399149	2.61886	KC6	keratoconus gene 6	0.2796
18	39484211	rs1368024	C	T	0.335774	2.43453	PIK3C3	phosphatidylinositol 3-kinase catalytic subunit type 3	0.4924
18	39505006	rs7241193	G	A	0.407612	2.10268	PIK3C3	phosphatidylinositol 3-kinase catalytic subunit type 3	0.4924
18	39514420	rs9948913	C	T	0.407612	2.10268	PIK3C3	phosphatidylinositol 3-kinase catalytic subunit type 3	0.4909
18	39583699	rs10775471	A	G	0.486062	2.03735	PIK3C3	phosphatidylinositol 3-kinase catalytic subunit type 3	0.4833
18	39627244	rs12455083	T	C	0.481494	2.05894	PIK3C3	phosphatidylinositol 3-kinase catalytic subunit type 3	0.4832
19	30265235	rs12461902	G	A	0.381208	3.21964	CCNE1	cyclin E1	0.3545
19	30806165	rs7252608	A	C	0.296593	2.27144	ZNF536	zinc finger protein 536	0.459
19	30807277	rs7257173	T	C	0.280701	2.31516	ZNF536	zinc finger protein 536	0.4561
19	30825568	rs16964099	T	C	0.323191	2.16207	ZNF536	zinc finger protein 536	0.4303
19	40264524	rs4239503	G	C	0.332421	2.75934	CLC	Charcot-Leyden crystal galectin	0.4847
19	40315444	rs3810382	C	G	0.308062	2.89364	LEUTX	leucine twenty homeobox	0.439
19	52089724	rs4507016	A	G	0.294314	2.96657	ZNF175	zinc finger protein 175	0.4803
19	52094962	rs4802818	G	T	0.301638	2.59083	LINC01530	long intergenic non-protein coding RNA 1530	0.4758
19	52127030	rs11084095	G	A	0.367204	2.3062	SIGLEC5	sialic acid binding Ig like lectin 5	0.4128
19	53763086	rs2914367	G	A	0.287035	2.11686	VN1R2	vomeronasal 1 receptor 2	0.35
20	8517451	rs2423366	A	G	0.309975	2.01206	PLCB1	phospholipase C beta 1	0.3818
20	37511454	rs208798	G	A	0.330594	2.32089	PPP1R16B	protein phosphatase 1 regulatory subunit 16B	0.2864
20	50227227	rs2235864	A	G	0.309569	2.50592	ATP9A	ATPase phospholipid transporting 9A (putative)	0.4771
20	56807792	rs2274932	T	C	0.278529	2.18299	PPP4R1L	protein phosphatase 4 regulatory subunit 1 like (pseudogene)	0.4273
22	28165101	rs17477193	T	G	0.29197	2.15821	MN1	MN1 proto-oncogene transcriptional regulator	0.1682
22	39907661	rs738288	G	A	0.880124	2.12228	MIEF1	mitochondrial elongation factor 1	0.4561
22	42682786	rs4822100	A	G	0.333868	2.21129	TCF20	transcription factor 20	0.4561

## Sheet: Table S3
Table S3: Candidate genes under selection in the Northwest region
Chromosome	Hg37 position	rs	Reference Allele	Alternate Allele	PBS	iHS	Gene Symbol	Gene name	MAIS minor allele freq
1	5051305	rs7367766	G	T	0.395234	1.98124	AJAP1	adherens junctions associated protein 1	0.311
1	5061519	rs10158288	T	C	0.304094	1.98922	AJAP1	adherens junctions associated protein 1	0.3182
1	5065850	rs10915309	G	A	0.26092	2.03582	AJAP1	adherens junctions associated protein 1	0.3182
1	5080433	rs6689504	G	T	0.344018	2.27266	AJAP1	adherens junctions associated protein 1	0.31
1	6742281	rs156985	T	C	0.348488	2.16164	DNAJC11	DnaJ heat shock protein family (Hsp40) member C11	0.3318
1	6771569	rs277671	A	C	0.348488	2.18432	DNAJC11	DnaJ heat shock protein family (Hsp40) member C11	0.3258
1	92243307	rs12751910	G	A	0.309189	2.68162	TGFBR3	transforming growth factor beta receptor 3	0.3091
1	92246048	rs17443164	C	G	0.309189	2.68162	TGFBR3	transforming growth factor beta receptor 3	0.3091
1	92256928	rs2129974	C	T	0.30798	2.89948	TGFBR3	transforming growth factor beta receptor 3	0.304
1	167503917	rs12038219	C	G	0.560937	2.03414	CREG1	cellular repressor of E1A stimulated genes 1	0.4561
1	227103413	rs12041000	G	A	0.309127	1.99867	COQ8A	coenzyme Q8A	0.5
1	242566798	rs1992277	G	A	0.414626	2.68885	PLD5	phospholipase D family member 5	0.3333
1	242590706	rs2810020	C	A	0.485966	2.26319	PLD5	phospholipase D family member 5	0.3485
1	242591749	rs2654873	G	T	0.485966	2.26319	PLD5	phospholipase D family member 5	0.3541
1	242595629	rs1394063	C	G	0.523854	2.30782	PLD5	phospholipase D family member 5	0.3593
1	242603322	rs10926736	T	C	0.63017	2.17433	PLD5	phospholipase D family member 5	0.3606
2	23987599	rs12474314	G	C	0.262406	2.43405	ATAD2B	ATPase family AAA domain containing 2B	0.3924
2	28737613	rs4233725	G	A	0.266388	3.10477	PLB1	phospholipase B1	0.3758
2	112699350	rs10207820	C	T	0.286425	2.16658	MERTK	MER proto-oncogene tyrosine kinase	0.3891
2	112704054	rs1516627	A	G	0.286425	2.16658	MERTK	MER proto-oncogene tyrosine kinase	0.3869
2	112705185	rs3761700	T	G	0.32725	2.16658	MERTK	MER proto-oncogene tyrosine kinase	0.3991
2	112722490	rs6541971	G	A	0.286425	2.16658	MERTK	MER proto-oncogene tyrosine kinase	0.3879
2	112741293	rs10180345	G	A	0.286425	2.19119	MERTK	MER proto-oncogene tyrosine kinase	0.3833
2	112742075	rs1996325	G	A	0.286425	2.19119	MERTK	MER proto-oncogene tyrosine kinase	0.3879
2	112743917	rs1554214	A	G	0.286425	2.19119	MERTK	MER proto-oncogene tyrosine kinase	0.3933
2	112744260	rs10207726	T	C	0.477224	2.19119	MERTK	MER proto-oncogene tyrosine kinase	0.3924
2	112745114	rs13394651	A	T	0.286425	2.19119	MERTK	MER proto-oncogene tyrosine kinase	0.3891
2	112752880	rs6739294	A	G	0.286425	2.19119	MERTK	MER proto-oncogene tyrosine kinase	0.3879
2	112753097	rs6726639	C	A	0.286425	2.19119	MERTK	MER proto-oncogene tyrosine kinase	0.3879
2	112753230	rs11683421	C	T	0.286425	2.19119	MERTK	MER proto-oncogene tyrosine kinase	0.386
2	112760944	rs4353657	A	C	0.289429	2.19119	MERTK	MER proto-oncogene tyrosine kinase	0.3902
2	112767406	rs11884641	G	A	0.508468	2.19119	MERTK	MER proto-oncogene tyrosine kinase	0.403
2	112770134	rs11683409	C	G	0.292526	2.19119	MERTK	MER proto-oncogene tyrosine kinase	0.3879
2	112776979	rs3811640	A	C	0.431961	2.02176	MERTK	MER proto-oncogene tyrosine kinase	0.4061
2	112779449	rs6737989	G	T	0.461704	2.02176	MERTK	MER proto-oncogene tyrosine kinase	0.4167
2	112814045	rs6713344	T	C	0.417912	2.07166	TMEM87B	transmembrane protein 87B	0.4273
2	144280518	rs10207679	C	G	0.290519	2.5418	ARHGAP15	Rho GTPase activating protein 15	0.3879
2	144282793	rs6732131	A	G	0.33292	2.5418	ARHGAP15	Rho GTPase activating protein 15	0.4515
2	144309026	rs6745691	G	A	0.31734	2.62106	ARHGAP15	Rho GTPase activating protein 15	0.4512
2	144316090	rs13412930	A	G	0.287754	2.62106	ARHGAP15	Rho GTPase activating protein 15	0.3924
2	144318169	rs6750323	C	T	0.321668	2.62106	ARHGAP15	Rho GTPase activating protein 15	0.4455
2	144332854	rs4325696	C	T	0.283846	2.61265	ARHGAP15	Rho GTPase activating protein 15	0.3894
2	144343304	rs4662343	A	T	0.339178	2.61265	ARHGAP15	Rho GTPase activating protein 15	0.45
2	155092983	rs2348922	A	C	0.300698	2.51238	GALNT13	polypeptide N-acetylgalactosaminyltransferase 13	0.4331
2	155138501	rs933757	T	G	0.321671	2.48639	GALNT13	polypeptide N-acetylgalactosaminyltransferase 13	0.4271
2	155181150	rs13032599	A	G	0.59999	2.54177	GALNT13	polypeptide N-acetylgalactosaminyltransferase 13	0.4182
2	155306752	rs707079	A	T	0.280974	2.26117	GALNT13	polypeptide N-acetylgalactosaminyltransferase 13	0.35
2	155308672	rs7582614	C	A	0.265276	2.26424	GALNT13	polypeptide N-acetylgalactosaminyltransferase 13	0.3526
2	161159692	rs11889328	A	G	0.298156	2.02106	RBMS1	RNA binding motif single stryed interacting protein 1	0.266
2	161196868	rs12692593	A	C	0.298156	2.02155	RBMS1	RNA binding motif single stryed interacting protein 1	0.2607
2	161217535	rs13008416	A	G	0.298156	2.02748	RBMS1	RNA binding motif single stryed interacting protein 1	0.2682
2	161235981	rs13397529	C	G	0.284606	2.38402	RBMS1	RNA binding motif single stryed interacting protein 1	0.2606
2	161288182	rs11687163	C	A	0.293772	2.37602	RBMS1	RNA binding motif single stryed interacting protein 1	0.2636
2	161315376	rs12692605	G	A	0.293772	2.37996	RBMS1	RNA binding motif single stryed interacting protein 1	0.2652
2	161318004	rs10176456	G	A	0.293772	2.38402	RBMS1	RNA binding motif single stryed interacting protein 1	0.2652
2	187846971	rs11675132	A	G	0.405625	2.25759	ZSWIM2	zinc finger SWIM-type containing 2	0.2879
2	205951940	rs16836906	A	G	0.304996	2.75211	PARD3B	par-3 family cell polarity regulator beta	0.3227
2	228065166	rs9283540	C	G	0.266388	2.89461	COL4A3	collagen type IV alpha 3 chain	0.403
3	11750215	rs6801925	C	G	0.320213	2.58815	VGLL4	vestigial like family member 4	0.4394
3	12478817	rs9833097	A	G	0.387103	2.48493	PPARG	peroxisome proliferator activated receptor gamma	0.4544
3	12656590	rs4684865	C	G	0.297694	2.06986	RAF1	Raf-1 proto-oncogene serine/threonine kinase	0.4485
3	68383055	rs7614996	C	G	0.260353	3.36663	FAM19A1	family with sequence similarity 19 member A1 C-C motif chemokine like	0.3606
3	96681559	rs4621347	A	C	0.306652	2.40119	EPHA6	EPH receptor A6	0.4439
3	96784464	rs6438925	G	T	0.403124	2.29811	EPHA6	EPH receptor A6	0.4394
3	96807782	rs6801624	C	G	0.316671	2.40632	EPHA6	EPH receptor A6	0.4512
3	96813048	rs11917307	A	G	0.40896	2.31725	EPHA6	EPH receptor A6	0.4451
3	96827817	rs1500704	A	G	0.381073	2.30497	EPHA6	EPH receptor A6	0.4451
3	96830145	rs1500705	A	G	0.381073	2.30497	EPHA6	EPH receptor A6	0.4455
3	96860229	rs1112475	G	C	0.269461	2.39444	EPHA6	EPH receptor A6	0.4409
3	96885697	rs9818654	G	T	0.360503	2.38607	EPHA6	EPH receptor A6	0.397
3	96886192	rs1392695	C	T	0.360503	2.38607	EPHA6	EPH receptor A6	0.3963
3	97046579	rs7633330	T	C	0.266228	2.07924	EPHA6	EPH receptor A6	0.4482
3	107576819	rs13092666	C	G	0.278551	2.19372	LINC00635	long intergenic non-protein coding RNA 635	0.2303
3	124061080	rs1025957	T	C	0.281458	3.07604	KALRN	kalirin RhoGEF kinase	0.2812
3	124083170	rs504918	T	C	0.467135	3.67069	KALRN	kalirin RhoGEF kinase	0.3303
3	124084974	rs492270	A	T	0.484989	3.67069	KALRN	kalirin RhoGEF kinase	0.3288
3	124088009	rs627830	G	A	0.441901	3.67069	KALRN	kalirin RhoGEF kinase	0.3343
3	124102388	rs9869539	A	G	0.357666	4.12785	KALRN	kalirin RhoGEF kinase	0.3697
3	124133368	rs3755664	C	T	0.369478	3.03271	KALRN	kalirin RhoGEF kinase	0.3121
3	124223298	rs522554	G	A	0.373909	2.25916	KALRN	kalirin RhoGEF kinase	0.2857
3	124224993	rs485887	A	G	0.303193	2.67709	KALRN	kalirin RhoGEF kinase	0.2835
3	124233545	rs4678121	C	T	0.353034	2.67247	KALRN	kalirin RhoGEF kinase	0.2894
3	149278045	rs9851477	C	T	0.515325	3.30183	WWTR1	WW domain containing transcription regulator 1	0.1439
3	149302302	rs1344816	G	T	0.315586	2.27565	WWTR1	WW domain containing transcription regulator 1	0.3061
3	168740165	rs1362525	T	C	0.326489	2.21842	MECOM	MDS1 y EVI1 complex locus	0.2455
4	64670507	rs17687721	T	C	0.380315	2.21676	TECRL	trans-23-enoyl-CoA reductase like	0.31
4	64671240	rs11938858	C	T	0.269622	2.44995	TECRL	trans-23-enoyl-CoA reductase like	0.1727
4	64681512	rs7659576	A	C	0.269622	2.44995	TECRL	trans-23-enoyl-CoA reductase like	0.1733
4	64732043	rs17688509	G	A	0.373751	2.8745	TECRL	trans-23-enoyl-CoA reductase like	0.3091
4	64734418	rs17637374	C	T	0.415767	2.8745	TECRL	trans-23-enoyl-CoA reductase like	0.3091
4	64908038	rs17639696	T	A	0.327273	2.8745	TECRL	trans-23-enoyl-CoA reductase like	0.2985
4	64912201	rs2053844	A	G	0.327273	2.8745	TECRL	trans-23-enoyl-CoA reductase like	0.2994
4	64912684	rs1375471	G	A	0.347065	2.8745	TECRL	trans-23-enoyl-CoA reductase like	0.2985
4	64915867	rs1554415	A	T	0.347065	2.8745	TECRL	trans-23-enoyl-CoA reductase like	0.3015
4	64916245	rs1554413	G	C	0.347065	2.8745	TECRL	trans-23-enoyl-CoA reductase like	0.2985
4	64930323	rs1449188	A	G	0.291655	2.44174	TECRL	trans-23-enoyl-CoA reductase like	0.1429
4	64934748	rs10028878	A	C	0.366891	2.87565	TECRL	trans-23-enoyl-CoA reductase like	0.3015
4	64966414	rs10009664	A	G	0.334134	2.87565	TECRL	trans-23-enoyl-CoA reductase like	0.2948
4	64970948	rs1402142	C	A	0.275156	2.43963	TECRL	trans-23-enoyl-CoA reductase like	0.1379
4	64974240	rs9996291	G	C	0.354308	2.8619	TECRL	trans-23-enoyl-CoA reductase like	0.2918
4	64981479	rs6854991	T	G	0.334134	2.8619	TECRL	trans-23-enoyl-CoA reductase like	0.2939
4	64993239	rs1589318	G	C	0.394287	2.8619	TECRL	trans-23-enoyl-CoA reductase like	0.2939
4	65020811	rs10014455	C	T	0.334134	2.8619	TECRL	trans-23-enoyl-CoA reductase like	0.2894
4	65027150	rs11733963	A	G	0.334134	2.8619	TECRL	trans-23-enoyl-CoA reductase like	0.2918
4	65071722	rs1304006	C	T	0.341792	2.66284	TECRL	trans-23-enoyl-CoA reductase like	0.2818
4	65113157	rs17652504	A	C	0.3814	2.72899	TECRL	trans-23-enoyl-CoA reductase like	0.2909
4	65133338	rs2014122	T	A	0.397317	2.72899	TECRL	trans-23-enoyl-CoA reductase like	0.2888
4	69932587	rs9991142	C	T	0.288737	2.13586	UGT2B7	UDP glucuronosyltransferase family 2 member B7	0.3723
4	69932752	rs4434329	T	C	0.288737	2.13586	UGT2B7	UDP glucuronosyltransferase family 2 member B7	0.3697
4	69940122	rs11937195	A	C	0.312713	2.13586	UGT2B7	UDP glucuronosyltransferase family 2 member B7	0.3712
4	69971335	rs7435335	A	G	0.312713	2.16401	UGT2B7	UDP glucuronosyltransferase family 2 member B7	0.3636
4	70701881	rs1503727	C	T	0.389112	2.15281	SULT1E1	sulfotransferase family 1E member 1	0.4787
4	70709207	rs3775779	A	T	0.399679	2.15281	SULT1E1	sulfotransferase family 1E member 1	0.4833
4	188583907	rs9992899	T	C	0.283809	2.5056	LINC02492	long intergenic non-protein coding RNA 2492	0.4167
4	188586853	rs11929702	C	A	0.295822	2.55352	LINC02492	long intergenic non-protein coding RNA 2492	0.4121
4	188598140	rs11132474	A	C	0.413344	5.36685	LINC02492	long intergenic non-protein coding RNA 2492	0.4606
4	188602736	rs866971	G	A	0.292361	4.79602	LINC02492	long intergenic non-protein coding RNA 2492	0.4773
4	188650233	rs7438821	T	G	0.536868	2.33171	LINC02492	long intergenic non-protein coding RNA 2492	0.4955
4	189439872	rs7677233	G	A	0.389625	2.34691	LINC01060	long intergenic non-protein coding RNA 1060	0.4455
5	3335397	rs7711130	G	A	0.299233	2.26639	LINC01377	long intergenic non-protein coding RNA 1377	0.4121
5	36655353	rs17290929	G	A	0.286717	3.11788	SLC1A3	solute carrier family 1 member 3	0.1333
5	71380659	rs17366380	G	C	0.37044	2.43855	MAP1B	microtubule associated protein 1B	0.2888
5	72419267	rs638333	C	T	0.542442	2.56834	TMEM171	transmembrane protein 171	0.497
5	72419617	rs636926	C	A	0.270947	2.60327	TMEM171	transmembrane protein 171	0.3303
5	159913603	rs3096021	C	T	0.273593	2.9078	MIR146A	microRNA 146a	0.4697
5	174468188	rs17064308	T	C	0.263902	2.94001	LINC01951	long intergenic non-protein coding RNA 1951	0.3055
6	9413201	rs2017505	C	T	0.479063	2.41463	NA	NA	0.3636
6	13716767	rs4715512	T	A	0.352094	2.30481	RANBP9	RAN binding protein 9	0.4409
6	13737010	rs9475227	G	T	0.372212	2.21715	RANBP9	RAN binding protein 9	0.4424
6	41898096	rs2479726	A	G	0.38247	2.43218	BYSL	bystin like	0.4863
6	91568963	rs16883676	C	A	0.277301	3.27389	MAP3K7	mitogen-activated protein kinase kinase kinase 7	0.1152
6	97440636	rs4839701	G	A	0.287493	2.54247	KLHL32	kelch like family member 32	0.4061
6	97454582	rs4839702	G	C	0.287493	2.5305	KLHL32	kelch like family member 32	0.4098
6	97478138	rs4839895	A	G	0.301909	2.5705	KLHL32	kelch like family member 32	0.4061
6	114240685	rs352092	T	C	0.33949	2.77455	FLJ34503	uncharacterized FLJ34503	0.4333
6	121326250	rs7748273	C	T	0.270511	2.28659	TBC1D32	TBC1 domain family member 32	0.4388
6	121334770	rs1318322	G	A	0.360965	2.29954	TBC1D32	TBC1 domain family member 32	0.4407
6	121340526	rs1935942	T	C	0.360965	2.28659	TBC1D32	TBC1 domain family member 32	0.4424
6	121358699	rs9482113	G	A	0.462015	2.27379	TBC1D32	TBC1 domain family member 32	0.4455
6	121383793	rs11153994	T	C	0.266242	2.28659	TBC1D32	TBC1 domain family member 32	0.4515
6	121400981	rs12526640	G	T	0.489939	2.26568	TBC1D32	TBC1 domain family member 32	0.4633
6	121457536	rs975679	C	T	0.295012	2.81613	TBC1D32	TBC1 domain family member 32	0.4559
6	121465011	rs1273745	C	G	0.327589	2.29685	TBC1D32	TBC1 domain family member 32	0.4514
6	121476363	rs2995680	G	C	0.327589	2.27022	TBC1D32	TBC1 domain family member 32	0.453
6	121481728	rs2797955	T	C	0.327589	2.27022	TBC1D32	TBC1 domain family member 32	0.4557
6	121482620	rs2455056	A	T	0.327589	2.27022	TBC1D32	TBC1 domain family member 32	0.4514
6	121483543	rs1776817	A	G	0.305628	2.27022	TBC1D32	TBC1 domain family member 32	0.4485
6	121499580	rs811484	A	G	0.449168	2.27022	TBC1D32	TBC1 domain family member 32	0.4529
6	121499838	rs7766150	G	A	0.300847	2.27022	TBC1D32	TBC1 domain family member 32	0.45
6	121600538	rs4585603	G	A	0.449168	2.31776	TBC1D32	TBC1 domain family member 32	0.4561
6	121620804	rs17083393	C	T	0.475244	2.33355	TBC1D32	TBC1 domain family member 32	0.4561
6	150471263	rs1408505	T	C	0.357104	2.31864	PPP1R14C	protein phosphatase 1 regulatory inhibitor subunit 14C	0.4076
6	150596143	rs789483	T	C	0.292848	3.23699	PPP1R14C	protein phosphatase 1 regulatory inhibitor subunit 14C	0.4152
6	150618750	rs11751092	A	G	0.555844	2.40314	PPP1R14C	protein phosphatase 1 regulatory inhibitor subunit 14C	0.4218
6	150642796	rs9384384	C	G	0.335365	2.69217	PPP1R14C	protein phosphatase 1 regulatory inhibitor subunit 14C	0.3212
6	150644476	rs9384388	G	A	0.35253	2.70018	PPP1R14C	protein phosphatase 1 regulatory inhibitor subunit 14C	0.3211
6	150659881	rs9383793	C	T	0.300177	2.63905	IYD	iodotyrosine deiodinase	0.4021
6	150665752	rs9397900	G	A	0.329082	3.07344	IYD	iodotyrosine deiodinase	0.3227
6	150673177	rs623882	G	A	0.300185	2.66867	IYD	iodotyrosine deiodinase	0.393
6	150673215	rs623829	A	G	0.310353	2.66867	IYD	iodotyrosine deiodinase	0.397
6	150694239	rs683255	T	C	0.295081	2.2487	IYD	iodotyrosine deiodinase	0.4128
6	150694707	rs11969964	G	A	0.354468	2.93785	IYD	iodotyrosine deiodinase	0.3258
6	150695460	rs660382	G	A	0.300204	2.2831	IYD	iodotyrosine deiodinase	0.4091
6	150703144	rs7761906	G	C	0.400272	2.87999	IYD	iodotyrosine deiodinase	0.3394
6	150711164	rs9397303	A	C	0.394011	2.77313	IYD	iodotyrosine deiodinase	0.3409
6	150716274	rs1556881	G	A	0.394011	2.83246	IYD	iodotyrosine deiodinase	0.3394
6	150716888	rs3823259	G	T	0.368988	3.16978	IYD	iodotyrosine deiodinase	0.3394
6	150719613	rs2076284	G	T	0.387835	2.8067	IYD	iodotyrosine deiodinase	0.3389
6	150721430	rs1416481	G	A	0.387835	3.08549	IYD	iodotyrosine deiodinase	0.3348
6	158084621	rs16900309	C	T	0.262019	2.79683	ZDHHC14	zinc finger DHHC-type containing 14	0.4106
7	5676119	rs852374	T	C	0.733448	2.2763	RNF216	ring finger protein 216	0.4879
7	5794220	rs11771172	C	T	0.791788	2.28074	RNF216	ring finger protein 216	0.4924
7	5812748	rs17186478	T	G	0.762469	2.30489	RNF216	ring finger protein 216	0.4924
7	31438372	rs11980453	C	T	0.358347	2.80851	NEUROD6	neuronal differentiation 6	0.2545
7	31442958	rs6950896	T	G	0.32481	2.30388	NEUROD6	neuronal differentiation 6	0.253
7	71217136	rs10276110	C	G	0.28343	2.39202	CALN1	calneuron 1	0.3091
7	88447187	rs3915191	A	G	0.265377	3.05414	ZNF804B	zinc finger protein 804B	0.4258
7	90848217	rs4621732	C	T	0.310885	3.93491	FZD1	frizzled class receptor 1	0.2294
7	103543903	rs6951651	G	C	0.279371	2.12436	RELN	reelin	0.3982
8	24371091	rs17812926	T	C	0.379512	2.21729	LOC101929315	uncharacterized LOC101929315	0.2242
8	28064115	rs17411752	A	G	0.314471	2.22401	ELP3	elongator acetyltransferase complex subunit 3	0.3636
8	28065022	rs10866872	C	G	0.338244	2.22401	ELP3	elongator acetyltransferase complex subunit 3	0.3576
8	28069928	rs12543257	A	C	0.318258	2.2234	ELP3	elongator acetyltransferase complex subunit 3	0.3674
8	30846883	rs2543607	T	C	0.359257	2.02838	PURG	purine rich element binding protein G	0.4571
8	30854392	rs9987093	G	A	0.359257	2.03286	PURG	purine rich element binding protein G	0.45
8	39900719	rs2929116	C	T	0.326136	2.35367	IDO2	indoleamine 23-dioxygenase 2	0.447
8	39901797	rs2929115	G	A	0.326136	2.33615	IDO2	indoleamine 23-dioxygenase 2	0.4453
8	117025017	rs1016004	A	T	0.294969	2.18788	LINC00536	long intergenic non-protein coding RNA 536	0.3
8	132739778	rs12541606	T	G	0.267397	2.25232	EFR3A	EFR3 homolog A	0.4347
8	132766258	rs16904516	C	T	0.293451	2.24398	EFR3A	EFR3 homolog A	0.4271
8	133341012	rs876110	T	C	0.268047	2.18612	KCNQ3	potassium voltage-gated channel subfamily Q member 3	0.4331
9	16435848	rs3739714	T	C	0.287518	2.19547	BNC2	basonuclin 2	0.1545
9	16801850	rs2254193	A	C	0.318921	2.91595	BNC2	basonuclin 2	0.1955
9	16802998	rs2243614	T	C	0.318921	2.91595	BNC2	basonuclin 2	0.1909
9	16804197	rs2254468	A	G	0.346511	2.72991	BNC2	basonuclin 2	0.1939
9	28648677	rs16913482	A	G	0.466606	2.32814	LINGO2	leucine rich repeat y Ig domain containing 2	0.4544
9	28705578	rs1583668	T	C	0.466606	2.1592	LINGO2	leucine rich repeat y Ig domain containing 2	0.4621
9	107680639	rs10512335	T	G	0.264509	2.24475	ABCA1	ATP binding cassette subfamily A member 1	0.4375
9	113582050	rs2821140	T	C	0.27818	2.36166	LPAR1	lysophosphatidic acid receptor 1	0.3288
9	124441524	rs12350307	G	A	0.315501	2.32187	DAB2IP	DAB2 interacting protein	0.4803
9	124441848	rs12005159	C	G	0.310189	2.32187	DAB2IP	DAB2 interacting protein	0.4833
9	124442040	rs7875072	T	C	0.310189	2.32187	DAB2IP	DAB2 interacting protein	0.4769
9	124897527	rs7875181	G	A	0.278081	2.49515	NDUFA8	NADH:ubiquinone oxidoreductase subunit A8	0.08939
9	124929161	rs7466389	C	T	0.278081	2.34403	MORN5	MORN repeat containing 5	0.08841
9	124943542	rs11788440	C	T	0.278081	2.35642	MORN5	MORN repeat containing 5	0.08636
10	7610506	rs1537625	A	C	0.276622	2.46587	ITIH5	inter-alpha-trypsin inhibitor heavy chain family member 5	0.3348
10	14874692	rs6602768	G	A	0.287262	2.72998	CDNF	cerebral dopamine neurotrophic factor	0.2
10	14891406	rs17155992	G	A	0.287262	2.72998	HSPA14	heat shock protein family A (Hsp70) member 14	0.197
10	35879245	rs2474749	G	A	0.448737	2.17883	GJD4	gap junction protein delta 4	0.08636
10	35894794	rs637928	G	T	0.448737	2.17883	GJD4	gap junction protein delta 4	0.08636
10	35894922	rs638413	G	A	0.440535	2.17883	GJD4	gap junction protein delta 4	0.08537
10	53231446	rs293300	T	C	0.393627	2.18247	PRKG1	protein kinase cGMP-dependent 1	0.3939
10	57921330	rs11005235	T	C	0.275788	2.92754	ZWINT	ZW10 interacting kinetochore protein	0.3374
10	57954989	rs2002031	G	A	0.299068	2.94755	ZWINT	ZW10 interacting kinetochore protein	0.3359
10	58032156	rs16908530	C	T	0.454377	3.05877	ZWINT	ZW10 interacting kinetochore protein	0.3273
10	58076723	rs12255620	T	G	0.31987	3.00158	ZWINT	ZW10 interacting kinetochore protein	0.3288
10	58084841	rs11005314	T	G	0.301551	2.55611	ZWINT	ZW10 interacting kinetochore protein	0.4727
10	58086214	rs12255924	T	C	0.30593	2.71871	ZWINT	ZW10 interacting kinetochore protein	0.4712
10	58086503	rs12263637	G	A	0.30593	2.71871	ZWINT	ZW10 interacting kinetochore protein	0.4742
10	58090264	rs9971280	C	T	0.360936	2.57862	ZWINT	ZW10 interacting kinetochore protein	0.4712
10	58110406	rs16908801	C	T	0.344258	3.60552	ZWINT	ZW10 interacting kinetochore protein	0.3161
10	58125900	rs11005338	A	G	0.353267	2.80119	ZWINT	ZW10 interacting kinetochore protein	0.3182
10	58161893	rs2263916	A	G	0.353267	2.8387	ZWINT	ZW10 interacting kinetochore protein	0.3191
10	58237680	rs11005363	G	C	0.353267	2.97485	ZWINT	ZW10 interacting kinetochore protein	0.3242
10	58276545	rs11005382	A	G	0.35252	2.31557	ZWINT	ZW10 interacting kinetochore protein	0.3227
10	70931474	rs1802295	C	T	0.486342	2.25011	VPS26A	VPS26 retromer complex component A	0.2309
10	91737349	rs7920861	T	G	0.416393	2.24207	LINC01375	long intergenic non-protein coding RNA 1375	0.3379
10	97468589	rs10882654	T	G	0.280032	2.8185	TCTN3	tectonic family member 3	0.2942
10	120366876	rs1766262	T	A	0.512626	2.35587	PRLHR	prolactin releasing hormone receptor	0.3439
10	120442882	rs17662895	T	C	0.512481	2.42976	CACUL1	CDK2 associated cullin domain 1	0.3146
10	121129167	rs17608302	C	T	0.291685	2.81199	GRK5	G protein-coupled receptor kinase 5	0.3784
10	126202890	rs12413427	C	T	0.45648	2.40966	LHPP	phospholysine phosphohistidine inorganic pyrophosphate phosphatase	0.3409
11	2220652	rs11043069	C	T	0.353763	2.47442	ASCL2	achaete-scute family bHLH transcription factor 2	0.447
11	6768655	rs10839610	G	A	0.319258	2.14486	GVINP1	GTPase very large interferon inducible pseudogene 1	0.2188
11	6773439	rs7928685	C	T	0.321987	2.14486	OR2AG2	olfactory receptor family 2 subfamily AG member 2	0.2158
11	21636955	rs2219540	T	A	0.303761	2.34366	NELL1	neural EGFL like 1	0.3879
11	31173243	rs4369378	G	T	0.510347	2.19709	DCDC1	doublecortin domain containing 1	0.3
11	31210714	rs7949998	A	G	0.510347	2.19632	DCDC1	doublecortin domain containing 1	0.2948
11	31232624	rs2616789	T	C	0.510347	2.16175	DCDC1	doublecortin domain containing 1	0.3
11	31287523	rs2616805	A	C	0.510347	2.24257	DCDC1	doublecortin domain containing 1	0.3015
11	62080857	rs12282256	T	C	0.276248	2.16982	SCGB1D4	secretoglobin family 1D member 4	0.4985
11	62083908	rs2463833	C	T	0.264768	2.19194	SCGB1D4	secretoglobin family 1D member 4	0.4924
11	62084003	rs11231029	G	A	0.276248	2.19194	SCGB1D4	secretoglobin family 1D member 4	0.4985
11	62088838	rs2463829	C	T	0.264768	2.07301	SCGB1D4	secretoglobin family 1D member 4	0.4954
11	71167820	rs1792316	C	A	0.290398	2.54319	NADSYN1	NAD synthetase 1	0.4085
11	71190632	rs4944063	G	A	0.282316	2.54319	NADSYN1	NAD synthetase 1	0.424
11	71213007	rs751389	G	C	0.27111	2.54319	NADSYN1	NAD synthetase 1	0.4242
11	104885147	rs491191	T	C	0.483379	2.2957	CASP5	caspase 5	0.4712
11	104894171	rs516286	G	T	0.483379	2.2957	CASP5	caspase 5	0.4712
11	104911697	rs7928549	T	C	0.45762	2.31814	CASP1	caspase 1	0.4712
11	104912012	rs17103597	T	G	0.45762	2.31814	CASP1	caspase 1	0.4697
11	104912221	rs542571	A	T	0.45762	2.31814	CARD16	caspase recruitment domain family member 16	0.4712
11	104912458	rs1503391	C	A	0.45762	2.31814	CARD16	caspase recruitment domain family member 16	0.4697
11	104924978	rs12800151	T	C	0.500131	2.22594	CASP1	caspase 1	0.4726
11	104939029	rs538943	C	T	0.500131	2.22594	CASP1	caspase 1	0.4712
11	104950495	rs481926	A	G	0.500131	2.18025	CASP1	caspase 1	0.4727
11	104964272	rs2155817	G	A	0.500131	2.34696	CARD17	caspase recruitment domain family member 17	0.4727
11	112218097	rs4937300	T	C	0.440989	2.38927	LOC283140	uncharacterized LOC283140	0.3936
11	116632500	rs10488699	C	T	0.357604	2.17198	BUD13	BUD13 homolog	0.2636
11	116652207	rs12286037	C	T	0.357604	2.2473	ZPR1	ZPR1 zinc finger	0.2636
11	120013307	rs470876	C	T	0.368252	2.18643	TRIM29	tripartite motif containing 29	0.4455
11	123475615	rs1274213	G	A	0.323303	2.15316	GRAMD1B	GRAM domain containing 1B	0.3288
11	131663817	rs7940659	C	G	0.424113	2.26656	NTM	neurotrimin	0.4061
11	131664190	rs7941338	G	A	0.424113	2.26656	NTM	neurotrimin	0.4076
11	131673987	rs4083232	G	A	0.388041	2.36567	NTM	neurotrimin	0.4101
12	3852360	rs1808285	A	G	0.393742	2.00992	CRACR2A	calcium release activated channel regulator 2A	0.4119
12	31410284	rs12423595	C	T	0.370882	2.1544	SINHCAF	SIN3-HDAC complex associated factor	0.2682
12	40328415	rs12423682	G	T	0.262068	4.50217	SLC2A13	solute carrier family 2 member 13	0.4012
12	40365383	rs535458	C	A	0.262068	3.21046	SLC2A13	solute carrier family 2 member 13	0.4
12	83444128	rs12814295	G	T	0.266584	3.24386	TMTC2	transmembrane y tetratricopeptide repeat containing 2	0.4253
12	83453620	rs12582321	C	T	0.352965	3.18521	TMTC2	transmembrane y tetratricopeptide repeat containing 2	0.4119
12	85231488	rs17182841	C	A	0.37202	2.87889	SLC6A15	solute carrier family 6 member 15	0.3258
12	100020033	rs6538920	G	A	0.292572	2.54691	ANKS1B	ankyrin repeat y sterile alpha motif domain containing 1B	0.2896
13	33882066	rs2321160	T	C	0.371252	2.27179	STARD13	StAR related lipid transfer domain containing 13	0.4453
13	40762851	rs17446306	T	C	0.281618	3.61663	LINC00332	long intergenic non-protein coding RNA 332	0.2515
13	41019165	rs9315777	A	C	0.373105	3.48213	LINC00598	long intergenic non-protein coding RNA 598	0.4757
13	46458021	rs724153	C	A	0.413309	2.18029	ZC3H13	zinc finger CCCH-type containing 13	0.3106
13	54693040	rs1984140	C	T	0.415869	2.94867	LINC00458	long intergenic non-protein coding RNA 458	0.2848
13	54694923	rs2576131	C	T	0.415869	2.94867	LINC00458	long intergenic non-protein coding RNA 458	0.2848
13	54700303	rs2576127	T	G	0.415869	2.95444	LINC00458	long intergenic non-protein coding RNA 458	0.2848
13	54700377	rs2576126	C	T	0.415869	2.95444	LINC00458	long intergenic non-protein coding RNA 458	0.2805
13	54711236	rs2784568	G	T	0.374981	2.85994	LINC00458	long intergenic non-protein coding RNA 458	0.497
13	79362805	rs12428698	G	C	0.346796	2.56125	LINC00331	long intergenic non-protein coding RNA 331	0.2006
13	110919205	rs595325	A	C	0.302886	2.74254	COL4A1	collagen type IV alpha 1 chain	0.1
14	72931304	rs3819549	G	A	0.304392	2.56922	RGS6	regulator of G protein signaling 6	0.3354
14	72939735	rs10131497	C	T	0.367674	2.47105	RGS6	regulator of G protein signaling 6	0.3282
14	72954772	rs2239276	C	G	0.382185	2.26194	RGS6	regulator of G protein signaling 6	0.3394
14	72954805	rs2239275	C	G	0.382185	2.26194	RGS6	regulator of G protein signaling 6	0.3399
14	72954859	rs2239274	C	G	0.320756	2.81914	RGS6	regulator of G protein signaling 6	0.3364
14	72954990	rs2239273	T	G	0.320756	2.81914	RGS6	regulator of G protein signaling 6	0.3348
14	89415942	rs4904480	A	G	0.30951	2.23937	TTC8	tetratricopeptide repeat domain 8	0.3924
14	89416057	rs4904481	T	G	0.30951	2.23937	TTC8	tetratricopeptide repeat domain 8	0.3909
14	89417252	rs2401785	A	G	0.305397	2.2213	TTC8	tetratricopeptide repeat domain 8	0.3951
14	89423736	rs1951337	A	C	0.301345	2.19737	TTC8	tetratricopeptide repeat domain 8	0.397
14	89425304	rs762018	A	T	0.301345	2.19737	TTC8	tetratricopeptide repeat domain 8	0.397
14	89427951	rs17125091	T	A	0.297351	2.19737	TTC8	tetratricopeptide repeat domain 8	0.3985
14	89430056	rs1885186	T	C	0.297351	2.19737	TTC8	tetratricopeptide repeat domain 8	0.3985
15	31419311	rs8031038	G	A	0.375346	3.52502	TRPM1	transient receptor potential cation channel subfamily M member 1	0.4621
15	31421176	rs803533	C	T	0.352383	3.52502	TRPM1	transient receptor potential cation channel subfamily M member 1	0.4606
16	19978897	rs12935531	C	T	0.274507	2.08774	GPR139	G protein-coupled receptor 139	0.2818
16	23854428	rs2188360	A	G	0.331629	2.31159	PRKCB	protein kinase C beta	0.4818
16	23864724	rs7404005	A	C	0.331629	2.42176	PRKCB	protein kinase C beta	0.4848
16	48226479	rs12443685	T	C	0.460638	2.45972	ABCC11	ATP binding cassette subfamily C member 11	0.3788
16	87726546	rs8056235	G	A	0.306489	2.30672	JPH3	junctophilin 3	0.2018
16	87751310	rs8059567	T	G	0.340464	2.29431	KLHDC4	kelch domain containing 4	0.1433
16	87755392	rs7184429	T	C	0.297767	2.29431	KLHDC4	kelch domain containing 4	0.1712
16	87768164	rs1599802	A	G	0.309165	2.2485	KLHDC4	kelch domain containing 4	0.147
16	87769704	rs1599799	A	G	0.332854	2.18379	KLHDC4	kelch domain containing 4	0.1485
16	87769888	rs1984981	G	A	0.332854	2.18379	KLHDC4	kelch domain containing 4	0.147
16	87769951	rs1984980	A	G	0.275784	2.18379	KLHDC4	kelch domain containing 4	0.1727
16	87776213	rs12597271	G	A	0.348291	2.18379	KLHDC4	kelch domain containing 4	0.147
17	8604353	rs17808442	T	A	0.332805	2.27349	MYH10	myosin heavy chain 10	0.453
17	37037718	rs11653086	G	T	0.446462	2.35871	LASP1	LIM y SH3 protein 1	0.4802
17	39197760	rs17843047	T	C	0.308712	2.01262	KRTAP1-1	keratin associated protein 1-1	0.4894
17	39622679	rs12603256	A	G	0.331779	2.0416	KRT32	keratin 32	0.3982
17	39624526	rs3809887	A	G	0.331779	2.0416	KRT35	keratin 35	0.403
17	39625398	rs12603111	C	T	0.331779	2.35457	KRT35	keratin 35	0.4
17	39631022	rs17495705	C	T	0.331779	2.35457	KRT35	keratin 35	0.3967
17	39648257	rs3760521	A	G	0.345865	2.96193	KRT36	keratin 36	0.4012
17	39648944	rs721411	T	C	0.406527	2.96193	KRT13	keratin 13	0.4621
17	40735077	rs9903251	G	C	0.68119	2.04716	RETREG3	reticulophagy regulator family member 3	0.4773
17	46840541	rs7219021	G	T	0.401717	2.44921	TTLL6	tubulin tyrosine ligase like 6	0.4572
17	46868710	rs3887854	T	C	0.378532	2.72721	TTLL6	tubulin tyrosine ligase like 6	0.4697
17	46872346	rs9901447	T	C	0.404264	2.72721	TTLL6	tubulin tyrosine ligase like 6	0.4773
17	46988044	rs999475	A	G	0.463545	2.53358	UBE2Z	ubiquitin conjugating enzyme E2 Z	0.4379
17	47008546	rs4793993	T	C	0.444084	2.6454	SNF8	SNF8 ESCRT-II complex subunit	0.4392
17	48580126	rs6504661	T	A	0.417817	2.393	RSAD1	radical S-adenosyl methionine domain containing 1	0.4061
17	59600468	rs12451827	A	G	0.563763	1.99354	TBX4	T-box 4	0.297
17	59642328	rs12451513	T	G	0.454403	1.99396	TBX4	T-box 4	0.2545
17	59704935	rs11650471	T	C	0.39966	2.17575	BRIP1	BRCA1 interacting protein C-terminal helicase 1	0.2424
17	59720425	rs4968582	G	A	0.396323	2.17575	BRIP1	BRCA1 interacting protein C-terminal helicase 1	0.2439
17	59728239	rs10438771	G	A	0.396323	2.17575	BRIP1	BRCA1 interacting protein C-terminal helicase 1	0.2439
17	59739005	rs10221278	T	C	0.359504	2.1826	BRIP1	BRCA1 interacting protein C-terminal helicase 1	0.2568
17	59913158	rs12602103	T	G	0.331446	2.57714	BRIP1	BRCA1 interacting protein C-terminal helicase 1	0.3682
17	59949487	rs8075585	A	T	0.494074	2.63861	INTS2	integrator complex subunit 2	0.4652
17	60789405	rs9891713	C	T	0.388482	2.51104	MARCH10	membrane associated ring-CH-type finger 10	0.378
17	69087104	rs9909477	G	A	0.273314	2.85943	CASC17	cancer susceptibility 17	0.3758
17	69096808	rs12449659	T	C	0.268226	2.98029	CASC17	cancer susceptibility 17	0.3773
18	685158	rs2847156	G	C	0.465687	2.25687	ENOSF1	enolase superfamily member 1	0.3857
18	685447	rs2606260	A	G	0.409655	2.25687	ENOSF1	enolase superfamily member 1	0.4015
18	685574	rs2847155	T	G	0.409655	2.25687	ENOSF1	enolase superfamily member 1	0.4015
18	11019761	rs987229	A	T	0.438478	2	PIEZO2	piezo type mechanosensitive ion channel component 2	0.4621
18	30036543	rs1458863	A	G	0.277754	1.97683	GAREM1	GRB2 associated regulator of MAPK1 subtype 1	0.4939
19	29584690	rs16962546	A	G	0.268659	2.24009	UQCRFS1	ubiquinol-cytochrome c reductase Rieske iron-sulfur polypeptide 1	0.1576
19	29588133	rs10416902	C	T	0.268659	2.45325	UQCRFS1	ubiquinol-cytochrome c reductase Rieske iron-sulfur polypeptide 1	0.1498
19	29590545	rs16962554	T	C	0.268659	2.45325	UQCRFS1	ubiquinol-cytochrome c reductase Rieske iron-sulfur polypeptide 1	0.1576
19	43537378	rs3922338	A	G	0.407245	2.61588	PSG11	pregnancy specific beta-1-glycoprotein 11	0.2462
19	43556843	rs4335867	A	C	0.336907	2.90577	PSG2	pregnancy specific beta-1-glycoprotein 2	0.2446
20	24427813	rs6049698	C	T	0.410065	2.36117	SYNDIG1	synapse differentiation inducing 1	0.4015
20	24430808	rs6036803	A	G	0.434119	2.36117	SYNDIG1	synapse differentiation inducing 1	0.4253
20	24586383	rs12480522	G	T	0.304599	2.4191	SYNDIG1	synapse differentiation inducing 1	0.2197
20	24590332	rs12481129	T	C	0.312331	2.44532	SYNDIG1	synapse differentiation inducing 1	0.2158
20	24727485	rs6049943	A	T	0.395899	2.2356	CST7	cystatin F	0.4667
20	24770231	rs226670	A	G	0.287003	2.28559	CST7	cystatin F	0.3909
20	24772505	rs226681	C	T	0.287003	2.28559	CST7	cystatin F	0.3909
20	24781420	rs226697	T	C	0.287003	2.35207	CST7	cystatin F	0.3891
20	25058135	rs7263632	C	T	0.562904	2.18387	VSX1	visual system homeobox 1	0.4394
20	25059546	rs12480307	C	T	0.562904	2.18387	VSX1	visual system homeobox 1	0.4394
20	25061308	rs4815368	T	C	0.552047	2.18387	VSX1	visual system homeobox 1	0.4394
20	25065518	rs6076315	A	G	0.571641	2.18387	VSX1	visual system homeobox 1	0.4436
20	25123482	rs6050360	T	C	0.641261	2.64905	LOC284798	uncharacterized LOC284798	0.4485
20	25130395	rs8115729	A	G	0.641261	2.64905	LOC284798	uncharacterized LOC284798	0.447
20	25141399	rs6107007	C	G	0.641261	2.64905	LOC284798	uncharacterized LOC284798	0.4409
20	40278483	rs734437	G	A	0.312594	4.81261	CHD6	chromodomain helicase DNA binding protein 6	0.3318
20	49714756	rs11086322	A	G	0.355027	2.02464	KCNG1	potassium voltage-gated channel modifier subfamily G member 1	0.4742
21	27796105	rs2830215	T	C	0.278472	2.21139	CYYR1-AS1	cysteine y tyrosine rich 1 antisense RNA 1	0.2788
21	39120131	rs857989	G	C	0.282814	2.22693	KCNJ6	potassium voltage-gated channel subfamily J member 6	0.282
21	39746265	rs2836348	G	A	0.332581	2.77094	ERG	ETS transcription factor ERG	0.3754
22	25480981	rs5760836	A	G	0.503248	2.17366	KIAA1671	KIAA1671	0.2546
22	30888412	rs5997665	C	T	0.374249	2.71947	SEC14L4	SEC14 like lipid binding 4	0.1003
22	30940372	rs5997678	T	C	0.2927	4.55816	SEC14L6	SEC14 like lipid binding 6	0.09394
22	33106947	rs5749498	G	T	0.303916	2.6664	SYN3	synapsin III	0.1348
22	33111247	rs12170368	C	T	0.316585	2.63397	SYN3	synapsin III	0.1288
22	33440219	rs10483168	G	T	0.27385	2.1653	SYN3	synapsin III	0.1945

## Sheet: Table S4
Table S4: Candidate genes under selection in the Center region
Chromosome	Hg37 position	rs	Reference Allele	Alternate Allele	PBS	iHS	Gene Symbol	Gene name	MAIS minor allele freq
1	4896261	rs12072038	C	G	0.212269	2.57885	AJAP1	adherens junctions associated protein 1	0.1398
1	4916605	rs1535736	T	C	0.184526	2.33711	AJAP1	adherens junctions associated protein 1	0.1231
1	4916906	rs1535734	G	A	0.184526	2.33711	AJAP1	adherens junctions associated protein 1	0.1242
1	4930181	rs1886112	T	C	0.188275	2.32657	AJAP1	adherens junctions associated protein 1	0.1246
1	4971217	rs2209159	T	C	0.325288	2.47222	AJAP1	adherens junctions associated protein 1	0.1394
1	5080433	rs6689504	G	T	0.222555	2.67435	AJAP1	adherens junctions associated protein 1	0.31
1	6742281	rs156985	T	C	0.300359	2.27053	DNAJC11	DnaJ heat shock protein family (Hsp40) member C11	0.3318
1	6771569	rs277671	A	C	0.322519	2.44508	DNAJC11	DnaJ heat shock protein family (Hsp40) member C11	0.3258
1	6784592	rs277681	C	A	0.38209	2.07687	DNAJC11	DnaJ heat shock protein family (Hsp40) member C11	0.2924
1	6793240	rs441515	C	G	0.23202	2.12595	LINC01672	long intergenic non-protein coding RNA 1672	0.3182
1	6924587	rs12406288	A	G	0.36157	2.58801	CAMTA1	calmodulin binding transcription activator 1	0.3
1	6960927	rs4908426	A	T	0.337645	3.06071	CAMTA1	calmodulin binding transcription activator 1	0.3
1	6976226	rs4908427	G	A	0.382602	2.60348	CAMTA1	calmodulin binding transcription activator 1	0.297
1	9355936	rs9442514	T	G	0.174769	2.37236	SPSB1	splA/ryanodine receptor domain y SOCS box containing 1	0.4726
1	12194612	rs1148471	G	A	0.18398	5.8078	TNFRSF8	TNF receptor superfamily member 8	0.2636
1	15031315	rs10803303	T	C	0.20634	2.18791	KAZN	kazrin periplakin interacting protein	0.3045
1	15039411	rs7516095	T	G	0.201053	2.14478	KAZN	kazrin periplakin interacting protein	0.3125
1	15044796	rs1883576	C	T	0.223373	2.14667	KAZN	kazrin periplakin interacting protein	0.3076
1	23887880	rs4649097	A	G	0.200117	2.26592	ID3	inhibitor of DNA binding 3 HLH protein	0.2727
1	23907702	rs4649099	A	G	0.255956	2.20139	ID3	inhibitor of DNA binding 3 HLH protein	0.266
1	49046897	rs2798121	G	C	0.177996	2.72783	AGBL4	ATP/GTP binding protein like 4	0.2197
1	58281264	rs852753	C	G	0.317916	2.08313	DAB1	DAB1 reelin adaptor protein	0.1322
1	58301491	rs852786	C	G	0.267281	2.11907	DAB1	DAB1 reelin adaptor protein	0.1368
1	117491123	rs4433378	G	A	0.191151	2.84702	PTGFRN	prostaglyin F2 receptor inhibitor	0.2061
1	159564045	rs10494329	G	C	0.162579	2.36187	APCS	amyloid P component serum	0.4621
1	159567848	rs1037144	A	G	0.168403	2.30522	APCS	amyloid P component serum	0.459
1	159567922	rs1037145	C	T	0.181477	2.52664	APCS	amyloid P component serum	0.4561
1	166828464	rs4657608	C	T	0.197701	3.4832	TADA1	transcriptional adaptor 1	0.1682
1	209759971	rs17014838	A	T	0.184532	2.03761	CAMK1G	calcium/calmodulin dependent protein kinase IG	0.4576
2	13083401	rs779384	A	C	0.197011	2.43151	TRIB2	tribbles pseudokinase 2	0.2545
2	37569508	rs952711	G	A	0.174542	2.60381	QPCT	glutaminyl-peptide cyclotransferase	0.3602
2	37569575	rs952712	T	C	0.182521	2.64211	QPCT	glutaminyl-peptide cyclotransferase	0.3628
2	37579971	rs2255991	T	C	0.167377	2.41941	QPCT	glutaminyl-peptide cyclotransferase	0.3667
2	42338486	rs17029230	A	G	0.177035	2.30672	PKDCC	protein kinase domain containing cytoplasmic	0.1809
2	52057287	rs10183053	G	A	0.179891	2.07749	LOC730100	uncharacterized LOC730100	0.3079
2	97241928	rs4907241	G	A	0.170119	2.34541	KANSL3	KAT8 regulatory NSL complex subunit 3	0.1485
2	97243305	rs12469420	A	G	0.170119	2.34541	KANSL3	KAT8 regulatory NSL complex subunit 3	0.1485
2	128637225	rs2405635	G	A	0.175434	2.43055	AMMECR1L	AMMECR1 like	0.196
2	143894656	rs354722	T	C	0.266109	2.10218	ARHGAP15	Rho GTPase activating protein 15	0.2227
2	143944581	rs354729	T	C	0.219691	2.61833	ARHGAP15	Rho GTPase activating protein 15	0.3374
2	143965332	rs10201629	A	G	0.210725	2.61833	ARHGAP15	Rho GTPase activating protein 15	0.3404
2	144024837	rs2890701	G	C	0.206542	2.28014	ARHGAP15	Rho GTPase activating protein 15	0.3333
2	144040731	rs7579046	T	G	0.393938	2.37217	ARHGAP15	Rho GTPase activating protein 15	0.4091
2	144040750	rs7605182	C	A	0.402782	2.31228	ARHGAP15	Rho GTPase activating protein 15	0.403
2	198147776	rs1896854	G	T	0.233178	2.2527	ANKRD44	ankyrin repeat domain 44	0.2621
2	198148191	rs12618567	T	A	0.234169	2.3203	ANKRD44	ankyrin repeat domain 44	0.2621
2	198162430	rs1429414	A	G	0.246873	2.3203	ANKRD44	ankyrin repeat domain 44	0.2652
2	198257795	rs4685	T	C	0.278057	2.19883	SF3B1	splicing factor 3b subunit 1	0.2652
2	198345797	rs787983	G	A	0.246578	2.24162	COQ10B	coenzyme Q10B	0.266
2	198362018	rs8539	T	C	0.261085	2.28573	HSPD1	heat shock protein family D (Hsp60) member 1	0.2622
2	198369370	rs6434930	T	C	0.243368	2.28573	HSPD1	heat shock protein family D (Hsp60) member 1	0.2652
2	198403697	rs3792159	C	T	0.235808	2.15508	MOB4	MOB family member 4 phocein	0.2668
2	198436103	rs7582536	A	G	0.236494	2.15508	RFTN2	raftlin family member 2	0.2675
2	198463090	rs10178946	G	T	0.271341	2.11953	RFTN2	raftlin family member 2	0.2576
2	198513877	rs7564924	C	T	0.230063	2.21505	RFTN2	raftlin family member 2	0.2591
2	198531529	rs9967823	A	G	0.221668	2.42291	RFTN2	raftlin family member 2	0.2607
2	198533369	rs6719832	A	G	0.230063	2.27301	RFTN2	raftlin family member 2	0.2591
2	223317212	rs12613007	A	G	0.189372	2.1021	SGPP2	sphingosine-1-phosphate phosphatase 2	0.2485
2	231882023	rs4973368	A	G	0.196897	2.47766	SPATA3	spermatogenesis associated 3	0.4545
2	231882118	rs4973370	A	G	0.196897	2.47766	SPATA3	spermatogenesis associated 3	0.4545
3	1172474	rs1010226	C	G	0.188359	2.14685	CNTN6	contactin 6	0.1894
3	2160106	rs9842506	T	G	0.202693	2.15169	CNTN4	contactin 4	0.3742
3	2160472	rs17194126	T	C	0.215293	2.15169	CNTN4	contactin 4	0.3799
3	10941102	rs958469	C	A	0.237395	2.25827	SLC6A11	solute carrier family 6 member 11	0.2318
3	10968172	rs746278	C	A	0.172915	2.24501	SLC6A11	solute carrier family 6 member 11	0.1429
3	12478817	rs9833097	A	G	0.199949	2.09051	PPARG	peroxisome proliferator activated receptor gamma	0.4544
3	115239407	rs16823817	C	A	0.172977	2.68943	GAP43	growth associated protein 43	0.4364
3	190980379	rs6773528	A	G	0.192249	2.26733	OSTN	osteocrin	0.4225
3	190980797	rs7644510	G	A	0.192249	2.26733	OSTN	osteocrin	0.4212
3	190985247	rs10937463	C	T	0.192249	2.2699	UTS2B	urotensin 2B	0.4212
3	190987067	rs17465071	C	T	0.19329	2.48423	UTS2B	urotensin 2B	0.4076
3	190987891	rs4515105	A	G	0.192249	2.28486	UTS2B	urotensin 2B	0.4197
3	190987963	rs2168154	C	G	0.192249	2.28486	UTS2B	urotensin 2B	0.4197
3	190991439	rs9877400	C	T	0.190537	2.28486	UTS2B	urotensin 2B	0.4212
3	191024206	rs9808988	G	A	0.189432	2.24789	UTS2B	urotensin 2B	0.2644
3	191046770	rs4687210	A	G	0.167504	2.3581	UTS2B	urotensin 2B	0.2379
3	191169024	rs167149	C	T	0.166773	2.08559	CCDC50	coiled-coil domain containing 50	0.2394
3	194579376	rs6772240	T	C	0.224779	2.22628	XXYLT1	xyloside xylosyltransferase 1	0.4894
4	39414993	rs11940694	G	A	0.251906	2.61512	KLB	klotho beta	0.2515
4	66452949	rs6834811	A	C	0.169711	2.23023	EPHA5	EPH receptor A5	0.197
4	89066715	rs2622626	C	A	0.176536	2.25671	ABCG2	ATP binding cassette subfamily G member 2 (Junior blood group)	0.1976
4	89088475	rs2622609	C	A	0.166305	2.10835	ABCG2	ATP binding cassette subfamily G member 2 (Junior blood group)	0.1884
4	89097477	rs1481017	C	T	0.166952	2.07728	ABCG2	ATP binding cassette subfamily G member 2 (Junior blood group)	0.1985
4	89149026	rs2046132	C	G	0.169291	2.25171	ABCG2	ATP binding cassette subfamily G member 2 (Junior blood group)	0.2061
4	89156899	rs4693941	A	T	0.18648	2.26923	ABCG2	ATP binding cassette subfamily G member 2 (Junior blood group)	0.2061
4	151122552	rs2054271	A	G	0.18642	2.69842	DCLK2	doublecortin like kinase 2	0.4218
4	166285761	rs12642246	A	T	0.236888	2.38806	CPE	carboxypeptidase E	0.1939
4	166286171	rs4621390	G	A	0.192127	2.38806	CPE	carboxypeptidase E	0.1924
4	166659698	rs716399	G	A	0.179468	2.90914	LINC01179	long intergenic non-protein coding RNA 1179	0.2766
4	166666480	rs881821	T	C	0.178097	2.5988	LINC01179	long intergenic non-protein coding RNA 1179	0.1591
5	15539360	rs12521185	A	G	0.21021	2.68999	FBXL7	F-box y leucine rich repeat protein 7	0.2994
5	65437974	rs3915775	A	G	0.165532	2.55036	SREK1	splicing regulatory glutamic acid y lysine rich protein 1	0.3723
5	150498981	rs2303022	G	C	0.302029	2.38688	ANXA6	annexin A6	0.1212
5	150501366	rs11167538	T	G	0.304439	2.45326	ANXA6	annexin A6	0.1227
5	152798614	rs1019507	A	C	0.192174	2.09834	GRIA1	glutamate ionotropic receptor AMPA type subunit 1	0.1803
5	152801466	rs1600146	G	C	0.21123	2.91784	GRIA1	glutamate ionotropic receptor AMPA type subunit 1	0.2248
5	155299213	rs17617120	T	C	0.208387	3.29987	SGCD	sarcoglycan delta	0.1733
6	10206722	rs6926380	T	C	0.176489	2.21166	OFCC1	orofacial cleft 1 cyidate 1	0.4379
6	21968482	rs873669	C	G	0.187168	2.15382	CASC15	cancer susceptibility 15	0.1485
6	35422754	rs2395626	T	G	0.207392	2.63417	FANCE	FA complementation group E	0.1318
6	36722951	rs236446	T	C	0.190179	2.73495	CPNE5	copine 5	0.2842
6	45506122	rs12209785	G	A	0.215498	2.04851	RUNX2	runt related transcription factor 2	0.4205
6	45526942	rs1200426	T	G	0.290034	2.13502	RUNX2	runt related transcription factor 2	0.4281
6	50803050	rs987237	G	A	0.18997	2.95759	TFAP2B	transcription factor AP-2 beta	0.3404
6	106543945	rs2076060	C	G	0.172284	2.08574	PRDM1	PR/SET domain 1	0.304
7	6071277	rs4724770	A	G	0.188332	2.61748	EIF2AK1	eukaryotic translation initiation factor 2 alpha kinase 1	0.4833
7	31558879	rs217157	G	T	0.168409	2.61053	ITPRID1	ITPR interacting domain containing 1	0.4364
7	31564717	rs217170	G	A	0.168409	2.66241	ITPRID1	ITPR interacting domain containing 1	0.4364
7	103977242	rs2106504	T	A	0.210417	2.53317	LHFPL3	LHFPL tetraspan subfamily member 3	0.2303
7	103990382	rs6958831	G	T	0.193201	2.58786	LHFPL3	LHFPL tetraspan subfamily member 3	0.2416
7	103997924	rs10240925	T	C	0.194527	2.5633	LHFPL3	LHFPL tetraspan subfamily member 3	0.2249
7	104114709	rs11972050	G	C	0.164862	2.78178	LHFPL3	LHFPL tetraspan subfamily member 3	0.1505
7	104174623	rs13233643	T	C	0.168147	2.34366	LHFPL3	LHFPL tetraspan subfamily member 3	0.2864
7	104382873	rs4367471	C	T	0.17555	2.35329	LHFPL3	LHFPL tetraspan subfamily member 3	0.4121
7	104395340	rs10953448	G	T	0.17555	2.35329	LHFPL3	LHFPL tetraspan subfamily member 3	0.4098
7	104400251	rs12669007	C	G	0.168361	2.62062	LHFPL3	LHFPL tetraspan subfamily member 3	0.497
7	104403259	rs10953449	G	C	0.17555	2.77424	LHFPL3	LHFPL tetraspan subfamily member 3	0.4134
7	106491677	rs1724262	A	G	0.184209	2.08867	PIK3CG	phosphatidylinositol-45-bisphosphate 3-kinase catalytic subunit gamma	0.4742
8	30846883	rs2543607	T	C	0.183232	2.62552	PURG	purine rich element binding protein G	0.4571
8	30854392	rs9987093	G	A	0.205199	2.60294	PURG	purine rich element binding protein G	0.45
8	132739778	rs12541606	G	T	0.217806	2.37651	EFR3A	EFR3 homolog A	0.4347
8	132766258	rs16904516	T	C	0.228676	2.37828	EFR3A	EFR3 homolog A	0.4271
8	132842020	rs12541773	A	G	0.333289	2.31712	EFR3A	EFR3 homolog A	0.4242
8	133257927	rs16904635	T	C	0.27102	2.33739	KCNQ3	potassium voltage-gated channel subfamily Q member 3	0.4271
8	133266770	rs4736411	A	T	0.278922	2.31188	KCNQ3	potassium voltage-gated channel subfamily Q member 3	0.4255
8	133276200	rs16904639	C	T	0.262848	2.29741	KCNQ3	potassium voltage-gated channel subfamily Q member 3	0.4266
8	133284974	rs2896655	A	G	0.274181	2.38459	KCNQ3	potassium voltage-gated channel subfamily Q member 3	0.4197
8	133341012	rs876110	C	T	0.317104	3.06041	KCNQ3	potassium voltage-gated channel subfamily Q member 3	0.4331
8	133530355	rs2673577	C	T	0.163315	3.3387	KCNQ3	potassium voltage-gated channel subfamily Q member 3	0.3636
8	133532377	rs2597343	G	A	0.163315	3.3387	KCNQ3	potassium voltage-gated channel subfamily Q member 3	0.3636
8	133533516	rs2721883	C	T	0.163315	3.3387	KCNQ3	potassium voltage-gated channel subfamily Q member 3	0.3636
8	133534265	rs2721884	G	A	0.189127	3.3387	KCNQ3	potassium voltage-gated channel subfamily Q member 3	0.3624
9	8361136	rs10511493	T	A	0.191065	2.71708	PTPRD	protein tyrosine phosphatase receptor type D	0.147
9	86319414	rs17080575	C	T	0.201821	2.10484	UBQLN1	ubiquilin 1	0.1652
9	86490594	rs7869387	G	A	0.168938	2.26059	KIF27	kinesin family member 27	0.1804
9	86611036	rs754144	T	C	0.167077	2.75011	RMI1	RecQ mediated genome instability 1	0.1758
9	90319414	rs3118860	T	C	0.205627	2.92104	DAPK1	death associated protein kinase 1	0.2076
9	90320954	rs1927973	G	A	0.169856	2.13134	DAPK1	death associated protein kinase 1	0.1581
9	90327095	rs3128499	A	G	0.234486	2.57597	CTSL	cathepsin L	0.1864
9	117669270	rs3827818	T	C	0.190294	2.56624	TNFSF8	TNF superfamily member 8	0.4788
9	117679730	rs3789878	C	G	0.218253	2.56624	TNFSF8	TNF superfamily member 8	0.4711
9	119098876	rs12378619	T	C	0.183658	3.62724	PAPPA	pappalysin 1	0.3298
9	127621644	rs3780591	A	G	0.376373	2.06489	RPL35	ribosomal protein L35	0.4621
9	135185355	rs744133	G	A	0.243835	2.06324	SETX	senataxin	0.424
9	137430674	rs9409980	G	A	0.183822	2.11118	LOC100506532	uncharacterized LOC100506532	0.2879
9	137434337	rs9409982	A	T	0.194946	2.11118	LOC100506532	uncharacterized LOC100506532	0.2894
10	70758098	rs2263813	G	T	0.224854	2.18562	KIF1BP	KIF1 binding protein	0.3348
10	70762353	rs2185654	G	A	0.224854	2.18562	KIF1BP	KIF1 binding protein	0.3374
10	81917957	rs3862518	C	T	0.306753	2.11977	ANXA11	annexin A11	0.3773
10	81924055	rs10466226	G	A	0.306753	2.10401	ANXA11	annexin A11	0.3773
10	81924373	rs10466228	G	A	0.306753	2.10401	ANXA11	annexin A11	0.3758
10	81934995	rs12763392	C	T	0.306753	2.10819	ANXA11	annexin A11	0.3796
10	81938632	rs12256429	C	T	0.306753	2.10194	ANXA11	annexin A11	0.3773
10	81940701	rs6585454	G	A	0.306753	2.10194	ANXA11	annexin A11	0.3773
10	81940864	rs12779955	C	T	0.306753	2.10194	ANXA11	annexin A11	0.3773
11	2751285	rs231910	G	A	0.20473	2.39434	KCNQ1	potassium voltage-gated channel subfamily Q member 1	0.1581
11	44280090	rs729287	T	C	0.195168	2.06566	ALX4	ALX homeobox 4	0.1348
11	45727559	rs17786758	A	G	0.189812	2.35625	CHST1	carbohydrate sulfotransferase 1	0.2924
11	45740092	rs17724891	G	A	0.185938	2.16909	CHST1	carbohydrate sulfotransferase 1	0.2948
11	45740173	rs2666893	A	G	0.162381	2.16909	CHST1	carbohydrate sulfotransferase 1	0.2939
11	79046533	rs538821	T	C	0.17006	2.11836	TENM4	teneurin transmembrane protein 4	0.3545
11	105507166	rs12574741	C	T	0.236283	2.30413	GRIA4	glutamate ionotropic receptor AMPA type subunit 4	0.1337
11	105507517	rs6591137	C	T	0.237416	2.30413	GRIA4	glutamate ionotropic receptor AMPA type subunit 4	0.1333
11	105510193	rs10895849	T	C	0.239422	2.30413	GRIA4	glutamate ionotropic receptor AMPA type subunit 4	0.1333
11	105569356	rs10791767	G	A	0.165053	2.09079	GRIA4	glutamate ionotropic receptor AMPA type subunit 4	0.1242
11	105588857	rs632100	A	G	0.165053	2.18123	GRIA4	glutamate ionotropic receptor AMPA type subunit 4	0.1242
11	112837269	rs12295969	G	C	0.218159	2.03356	NCAM1	neural cell adhesion molecule 1	0.4333
11	112897907	rs17114694	T	C	0.190984	2.16221	NCAM1	neural cell adhesion molecule 1	0.4227
11	113313389	rs4648318	C	T	0.195738	2.35501	DRD2	dopamine receptor D2	0.2303
11	128663126	rs10488705	C	T	0.164076	2.19635	FLI1	Fli-1 proto-oncogene ETS transcription factor	0.3318
12	3867263	rs11062799	G	A	0.204692	2.07725	CRACR2A	calcium release activated channel regulator 2A	0.1182
12	14045266	rs10492142	C	T	0.1626	2.13105	GRIN2B	glutamate ionotropic receptor NMDA type subunit 2B	0.3273
12	14045718	rs10845858	A	G	0.1626	2.13105	GRIN2B	glutamate ionotropic receptor NMDA type subunit 2B	0.3273
12	30983550	rs10492243	C	T	0.203077	2.96963	LINC00941	long intergenic non-protein coding RNA 941	0.2682
12	31009557	rs11612603	T	C	0.188539	2.86213	LINC00941	long intergenic non-protein coding RNA 941	0.2644
12	31038082	rs919211	A	T	0.213427	2.63208	TSPAN11	tetraspanin 11	0.1687
12	31054860	rs244504	G	A	0.213335	2.5214	TSPAN11	tetraspanin 11	0.1803
12	31055840	rs244503	C	G	0.209135	2.53179	TSPAN11	tetraspanin 11	0.1667
12	31063131	rs4931386	G	A	0.233216	2.53179	TSPAN11	tetraspanin 11	0.1717
12	31071897	rs10734794	C	T	0.218035	2.48199	TSPAN11	tetraspanin 11	0.2333
12	31392499	rs4931473	A	G	0.225928	3.13695	OVOS2	NA	0.2712
12	31410284	rs12423595	C	T	0.191962	2.70572	SINHCAF	SIN3-HDAC complex associated factor	0.2682
12	40724030	rs11176053	T	C	0.193302	3.63515	LRRK2	leucine rich repeat kinase 2	0.3455
12	42980489	rs11181569	C	T	0.381454	2.15921	PRICKLE1	prickle planar cell polarity protein 1	0.1561
12	45238904	rs2055677	G	C	0.172102	2.1748	NELL2	neural EGFL like 2	0.3921
12	45239348	rs2055676	A	T	0.172102	2.1748	NELL2	neural EGFL like 2	0.3939
12	50199651	rs11169160	A	T	0.168015	2.59589	NCKAP5L	NCK associated protein 5 like	0.1682
12	117225078	rs2088236	T	C	0.169123	2.9027	RNFT2	ring finger protein transmembrane 2	0.1167
12	117672135	rs3741476	T	C	0.189479	2.12551	NOS1	nitric oxide synthase 1	0.1697
13	24291878	rs745068	T	G	0.170173	2.43025	TNFRSF19	TNF receptor superfamily member 19	0.347
13	24294158	rs753953	C	T	0.163955	2.43025	TNFRSF19	TNF receptor superfamily member 19	0.348
13	24297153	rs7993131	A	C	0.185964	2.15056	TNFRSF19	TNF receptor superfamily member 19	0.3439
13	53510831	rs9568779	T	C	0.19801	2.10983	OLFM4	olfactomedin 4	0.3515
13	90756983	rs2637451	T	G	0.20844	2.28182	LINC00559	long intergenic non-protein coding RNA 559	0.09909
13	94938785	rs1409174	A	G	0.184933	2.70454	GPC6	glypican 6	0.2015
15	58718998	rs7170361	C	T	0.172966	2.18883	LIPC	lipase C hepatic type	0.1697
16	34602945	rs17723574	G	C	0.327662	2.48578	LINC01566	long intergenic non-protein coding RNA 1566	0.2212
16	48556573	rs9933187	T	G	0.192729	2.28971	N4BP1	NEDD4 binding protein 1	0.3636
16	48557918	rs9924078	A	C	0.18521	2.15764	N4BP1	NEDD4 binding protein 1	0.3652
17	5573766	rs6502872	T	C	0.179353	2.134	NLRP1	NLR family pyrin domain containing 1	0.3818
17	57572273	rs4968332	G	A	0.245778	3.40942	LINC01476	long intergenic non-protein coding RNA 1476	0.3389
17	59600468	rs12451827	A	G	0.163003	2.40848	TBX4	T-box 4	0.297
17	59642328	rs12451513	T	G	0.252354	2.37445	TBX4	T-box 4	0.2545
17	59704935	rs11650471	T	C	0.272184	2.27684	BRIP1	BRCA1 interacting protein C-terminal helicase 1	0.2424
17	59720425	rs4968582	G	A	0.270567	2.27684	BRIP1	BRCA1 interacting protein C-terminal helicase 1	0.2439
17	59728239	rs10438771	G	A	0.266468	2.27684	BRIP1	BRCA1 interacting protein C-terminal helicase 1	0.2439
17	59739005	rs10221278	T	C	0.181337	3.13766	BRIP1	BRCA1 interacting protein C-terminal helicase 1	0.2568
17	63495631	rs9892932	T	C	0.192589	2.23993	AXIN2	axin 2	0.197
17	72544663	rs2706536	A	G	0.16552	2.07003	CD300C	CD300c molecule	0.269
18	3129131	rs8089599	T	C	0.205932	2.03942	MYOM1	myomesin 1	0.4394
18	7153795	rs11874166	T	G	0.171422	2.09071	LRRC30	leucine rich repeat containing 30	0.1955
18	67142857	rs17184557	A	T	0.180792	2.22092	DOK6	docking protein 6	0.3364
19	17769166	rs7258943	C	T	0.18036	2.21815	UNC13A	unc-13 homolog A	0.2606
19	50761189	rs386168	G	C	0.179146	2.36068	MYH14	myosin heavy chain 14	0.153
20	24572046	rs6049798	T	A	0.185164	2.12938	SYNDIG1	synapse differentiation inducing 1	0.2197
20	24572331	rs4815280	A	T	0.185164	2.12938	SYNDIG1	synapse differentiation inducing 1	0.2182
20	39776046	rs760762	C	T	0.20156	2.12436	PLCG1	phospholipase C gamma 1	0.3879
20	39797465	rs753381	T	C	0.195617	2.32312	PLCG1	phospholipase C gamma 1	0.3815
20	39811275	rs4297946	G	C	0.201347	2.32312	ZHX3	zinc fingers y homeoboxes 3	0.383
20	39911385	rs6029609	A	G	0.197241	2.11555	ZHX3	zinc fingers y homeoboxes 3	0.3872
20	39913632	rs2179372	C	G	0.197241	2.11555	ZHX3	zinc fingers y homeoboxes 3	0.3848
20	39938122	rs4812492	T	C	0.197241	2.74034	ZHX3	zinc fingers y homeoboxes 3	0.3848
20	40278483	rs734437	A	G	0.179839	2.44559	CHD6	chromodomain helicase DNA binding protein 6	0.3318
20	45599960	rs6122543	T	A	0.200024	3.42717	EYA2	EyA transcriptional coactivator y phosphatase 2	0.1394
20	54088577	rs10485778	T	A	0.213043	2.40227	CBLN4	cerebellin 4 precursor	0.3146
20	54090626	rs17001256	G	T	0.227653	2.68468	CBLN4	cerebellin 4 precursor	0.4061
20	54095311	rs16984758	G	A	0.220993	2.11239	CBLN4	cerebellin 4 precursor	0.4073
20	62270905	rs914561	T	C	0.162716	2.52646	STMN3	stathmin 3	0.4227
20	62306190	rs8124478	G	A	0.252122	2.46628	RTEL1	regulator of telomere elongation helicase 1	0.403
21	32444485	rs2833256	A	G	0.263363	2.72356	TIAM1	T cell lymphoma invasion y metastasis 1	0.2667
22	40778231	rs17001868	C	A	0.224345	2.22157	SGSM3	small G protein signaling modulator 3	0.1402
22	40815872	rs17425081	A	G	0.174757	3.43478	MRTFA	myocardin related transcription factor A	0.2173
22	40909156	rs3091393	G	C	0.328914	2.18232	MRTFA	myocardin related transcription factor A	0.1136
22	41071659	rs133063	C	T	0.406205	2.08916	MCHR1	melanin concentrating hormone receptor 1	0.114
22	41107688	rs12168697	T	C	0.230577	2.42969	MCHR1	melanin concentrating hormone receptor 1	0.1033

## Sheet: Table S5
Table S5: Candidate genes under selection in the South region
Chromosome	Hg37 position	rs	Reference Allele	Alternate Allele	PBS	iHS	Gene Symbol	Gene name	MAIS minor allele freq
1	4685648	rs875808	A	G	0.171198	2.17635	AJAP1	adherens junctions associated protein 1	0.1424
1	4971217	rs2209159	T	C	0.172282	2.58694	AJAP1	adherens junctions associated protein 1	0.1394
1	5048715	rs9426492	A	G	0.224095	2.18104	AJAP1	adherens junctions associated protein 1	0.3152
1	5051305	rs7367766	G	T	0.213607	2.71959	AJAP1	adherens junctions associated protein 1	0.311
1	5061519	rs10158288	T	C	0.192825	2.47928	AJAP1	adherens junctions associated protein 1	0.3182
1	5080433	rs6689504	G	T	0.244065	2.74009	AJAP1	adherens junctions associated protein 1	0.31
1	6742281	rs156985	T	C	0.269813	2.15601	DNAJC11	DnaJ heat shock protein family (Hsp40) member C11	0.3318
1	6771569	rs277671	A	C	0.284736	2.3238	DNAJC11	DnaJ heat shock protein family (Hsp40) member C11	0.3258
1	6793240	rs441515	C	G	0.282385	2.2585	LINC01672	long intergenic non-protein coding RNA 1672	0.3182
1	6808354	rs277675	C	T	0.197301	2.93942	LINC01672	long intergenic non-protein coding RNA 1672	0.09848
1	6922492	rs11120779	G	A	0.171088	2.46601	CAMTA1	calmodulin binding transcription activator 1	0.2712
1	6923726	rs1972306	C	T	0.216589	2.19152	CAMTA1	calmodulin binding transcription activator 1	0.2576
1	6924587	rs12406288	A	G	0.338929	2.57817	CAMTA1	calmodulin binding transcription activator 1	0.3
1	6960927	rs4908426	A	T	0.314842	2.67838	CAMTA1	calmodulin binding transcription activator 1	0.3
1	6976226	rs4908427	G	A	0.286978	2.71211	CAMTA1	calmodulin binding transcription activator 1	0.297
1	23887880	rs4649097	G	A	0.195843	2.22471	ID3	inhibitor of DNA binding 3 HLH protein	0.2727
1	34635092	rs7529786	A	G	0.212921	2.182	C1orf94	chromosome 1 open reading frame 94	0.3985
1	57547097	rs17114957	G	A	0.197118	2.20375	DAB1	DAB1 reelin adaptor protein	0.4803
1	117491123	rs4433378	G	A	0.28428	2.31871	PTGFRN	prostaglyin F2 receptor inhibitor	0.2061
1	166828464	rs4657608	C	T	0.274575	3.8076	TADA1	transcriptional adaptor 1	0.1682
1	166858941	rs10800276	G	A	0.189869	2.48657	TADA1	transcriptional adaptor 1	0.1348
1	166864189	rs7519593	G	A	0.205011	2.48692	TADA1	transcriptional adaptor 1	0.1357
1	167111293	rs11808527	T	C	0.183503	3.00336	DUSP27	dual specificity phosphatase 27 atypical	0.15
1	241754836	rs655970	G	A	0.173841	2.42646	KMO	kynurenine 3-monooxygenase	0.2879
1	241755925	rs640718	G	A	0.223305	2.6815	KMO	kynurenine 3-monooxygenase	0.3424
1	241774286	rs16841877	T	C	0.174135	2.34477	OPN3	opsin 3	0.343
1	242323596	rs1319804	A	T	0.204455	2.10151	PLD5	phospholipase D family member 5	0.3313
1	242350620	rs189779	T	C	0.173252	2.27067	PLD5	phospholipase D family member 5	0.3746
1	242398145	rs10926666	A	G	0.209187	2.19412	PLD5	phospholipase D family member 5	0.3227
2	36958374	rs6710234	C	T	0.233504	3.22368	VIT	vitrin	0.3613
2	36966349	rs10490662	C	T	0.241926	2.92223	VIT	vitrin	0.3667
2	36977116	rs12469652	G	A	0.23887	2.98704	VIT	vitrin	0.3697
2	36977577	rs10207138	T	C	0.220226	2.48232	VIT	vitrin	0.2652
2	36978749	rs10865116	A	G	0.200786	2.52116	VIT	vitrin	0.2621
2	36982752	rs2270321	C	T	0.19572	2.60512	VIT	vitrin	0.2636
2	42338486	rs17029230	G	A	0.202652	2.50859	PKDCC	protein kinase domain containing cytoplasmic	0.1809
2	42360831	rs7600992	T	C	0.173188	2.22504	PKDCC	protein kinase domain containing cytoplasmic	0.2939
2	144040731	rs7579046	T	G	0.27566	2.35607	ARHGAP15	Rho GTPase activating protein 15	0.4091
2	144040750	rs7605182	C	A	0.280356	2.33775	ARHGAP15	Rho GTPase activating protein 15	0.403
3	2160106	rs9842506	T	G	0.226603	3.2077	CNTN4	contactin 4	0.3742
3	2160472	rs17194126	T	C	0.226426	3.27189	CNTN4	contactin 4	0.3799
3	10941102	rs958469	C	A	0.194484	2.20158	SLC6A11	solute carrier family 6 member 11	0.2318
3	10966588	rs4684746	G	A	0.230047	2.65415	SLC6A11	solute carrier family 6 member 11	0.1379
3	10968172	rs746278	C	A	0.17006	2.59603	SLC6A11	solute carrier family 6 member 11	0.1429
3	11004257	rs7642251	A	G	0.197802	2.83512	SLC6A11	solute carrier family 6 member 11	0.1576
3	11016323	rs751960	G	A	0.193561	2.83512	SLC6A11	solute carrier family 6 member 11	0.1565
3	11017443	rs1728810	G	T	0.195739	2.41421	SLC6A11	solute carrier family 6 member 11	0.1576
3	11139579	rs4684758	A	G	0.17487	2.60024	SLC6A1	solute carrier family 6 member 1	0.2121
3	12468589	rs13099828	G	C	0.189863	2.30355	PPARG	peroxisome proliferator activated receptor gamma	0.4697
3	12471330	rs6782475	G	T	0.185855	2.30355	PPARG	peroxisome proliferator activated receptor gamma	0.4696
3	12475088	rs7626560	T	C	0.188773	2.36383	PPARG	peroxisome proliferator activated receptor gamma	0.4558
3	12478817	rs9833097	A	G	0.178287	3.32716	PPARG	peroxisome proliferator activated receptor gamma	0.4544
3	12494794	rs2249407	C	A	0.223752	2.45511	PPARG	peroxisome proliferator activated receptor gamma	0.4318
3	121793187	rs4308217	A	C	0.17027	2.94839	CD86	CD86 molecule	0.1167
3	139723808	rs987193	G	A	0.174994	2.18918	CLSTN2	calsyntenin 2	0.4027
4	21555307	rs16871393	C	A	0.216861	2.14064	KCNIP4	potassium voltage-gated channel interacting protein 4	0.2576
4	84958919	rs1921879	A	T	0.177763	2.12905	LOC101928978	uncharacterized LOC101928978	0.2317
4	84972690	rs11932985	C	T	0.2734	2.35528	LOC101928978	uncharacterized LOC101928978	0.1258
4	85024378	rs2868872	G	T	0.235798	2.22453	LOC101928978	uncharacterized LOC101928978	0.2167
4	85043820	rs41486746	A	G	0.22402	2.19473	LOC101928978	uncharacterized LOC101928978	0.2106
4	85056919	rs17008164	C	G	0.226306	2.19473	LOC101928978	uncharacterized LOC101928978	0.2106
4	85057124	rs17008168	A	G	0.22402	2.19473	LOC101928978	uncharacterized LOC101928978	0.2106
4	85066641	rs10516709	G	A	0.226306	2.19717	LOC101928978	uncharacterized LOC101928978	0.2106
4	85070169	rs1921892	A	C	0.226306	2.19473	LOC101928978	uncharacterized LOC101928978	0.2106
4	178915050	rs1462513	T	G	0.228864	3.32824	LINC01098	long intergenic non-protein coding RNA 1098	0.1697
4	178922743	rs2378808	A	T	0.221185	3.42061	LINC01098	long intergenic non-protein coding RNA 1098	0.1717
5	127693525	rs32238	G	T	0.218345	2.54013	FBN2	fibrillin 2	0.303
5	127707075	rs331096	G	A	0.185285	2.70198	FBN2	fibrillin 2	0.3136
5	150176501	rs6870304	C	A	0.176099	3.26518	IRGM	immunity related GTPase M	0.1429
5	150290146	rs2086120	G	A	0.205604	2.85172	ZNF300	zinc finger protein 300	0.1235
5	150313198	rs1531543	C	A	0.207744	2.84766	ZNF300P1	zinc finger protein 300 pseudogene 1	0.1227
5	150326976	rs6882830	A	G	0.207744	2.82118	ZNF300P1	zinc finger protein 300 pseudogene 1	0.1277
5	150331654	rs7720289	A	G	0.207744	2.85235	ZNF300P1	zinc finger protein 300 pseudogene 1	0.1258
6	77531261	rs2315637	C	T	0.207657	2.56746	HTR1B	5-hydroxytryptamine receptor 1B	0.1909
6	114240685	rs352092	T	C	0.191328	2.17157	FLJ34503	uncharacterized FLJ34503	0.4333
6	116754277	rs3213531	G	A	0.20188	2.65064	DSE	dermatan sulfate epimerase	0.4258
6	121758907	rs3805787	G	A	0.184631	2.4292	GJA1	gap junction protein alpha 1	0.1927
7	103977242	rs2106504	T	A	0.301935	2.285	LHFPL3	LHFPL tetraspan subfamily member 3	0.2303
7	103990382	rs6958831	G	T	0.235994	2.79415	LHFPL3	LHFPL tetraspan subfamily member 3	0.2416
7	103997924	rs10240925	T	C	0.284615	2.20768	LHFPL3	LHFPL tetraspan subfamily member 3	0.2249
7	104382873	rs4367471	T	C	0.186411	2.01796	LHFPL3	LHFPL tetraspan subfamily member 3	0.4121
7	104403259	rs10953449	C	G	0.186257	2.37193	LHFPL3	LHFPL tetraspan subfamily member 3	0.4134
7	147730228	rs4725761	G	A	0.229802	2.48914	CNTNAP2	contactin associated protein like 2	0.2173
8	27101279	rs3739214	T	C	0.173671	2.81252	STMN4	stathmin 4	0.3636
8	30854392	rs9987093	G	A	0.168684	2.48349	PURG	purine rich element binding protein G	0.45
8	71624632	rs268647	G	A	0.186939	2.32511	XKR9	XK related 9	0.1924
8	71676339	rs4738101	A	G	0.186939	2.34504	XKR9	XK related 9	0.1924
8	130232692	rs4733683	T	G	0.253363	2.18793	LINC00977	long intergenic non-protein coding RNA 977	0.1773
8	132842020	rs12541773	G	A	0.221098	2.19551	EFR3A	EFR3 homolog A	0.4242
8	133341012	rs876110	T	C	0.199528	2.90733	KCNQ3	potassium voltage-gated channel subfamily Q member 3	0.4331
8	143664312	rs3934486	G	A	0.241933	2.19811	ARC	activity regulated cytoskeleton associated protein	0.4924
8	143676026	rs4977021	T	C	0.24345	2.2725	ARC	activity regulated cytoskeleton associated protein	0.4954
9	8356540	rs7022162	C	T	0.206685	2.2296	PTPRD	protein tyrosine phosphatase receptor type D	0.1368
9	8361136	rs10511493	T	A	0.266391	2.4127	PTPRD	protein tyrosine phosphatase receptor type D	0.147
9	8362230	rs20514	T	G	0.187201	3.00269	PTPRD	protein tyrosine phosphatase receptor type D	0.1894
9	18355044	rs7861774	T	C	0.184428	2.38781	SH3GL2	SH3 domain containing GRB2 like 2 endophilin A1	0.1692
9	18362865	rs10511652	A	G	0.181169	3.04741	ADAMTSL1	ADAMTS like 1	0.1733
9	18364503	rs7020284	T	C	0.178178	3.36366	ADAMTSL1	ADAMTS like 1	0.1839
9	90319414	rs3118860	T	C	0.172449	3.03047	DAPK1	death associated protein kinase 1	0.2076
9	90320954	rs1927973	A	G	0.186142	2.0799	DAPK1	death associated protein kinase 1	0.1581
9	90327095	rs3128499	A	G	0.207538	2.49554	CTSL	cathepsin L	0.1864
9	119098876	rs12378619	C	T	0.182224	3.67039	PAPPA	pappalysin 1	0.3298
9	135185355	rs744133	G	A	0.194039	2.25731	SETX	senataxin	0.424
9	135559249	rs10901198	C	T	0.168559	2.6609	GTF3C4	general transcription factor IIIC subunit 4	0.353
9	137842500	rs10858300	T	C	0.181319	2.09477	OLFM1	olfactomedin 1	0.1682
10	80986678	rs1250592	G	A	0.17381	2.06963	ZMIZ1	zinc finger MIZ-type containing 1	0.45
10	81017467	rs1250530	C	T	0.206404	2.24587	ZMIZ1	zinc finger MIZ-type containing 1	0.4451
10	81018948	rs1269893	C	G	0.210335	2.15545	ZMIZ1	zinc finger MIZ-type containing 1	0.4924
11	6755642	rs12223054	T	A	0.183113	2.09677	GVINP1	GTPase very large interferon inducible pseudogene 1	0.2249
11	19120159	rs1125217	C	G	0.192912	2.66824	MRGPRX2	MAS related GPR family member X2	0.1636
11	19203165	rs1991249	G	A	0.205295	2.16551	CSRP3	cysteine y glycine rich protein 3	0.1242
11	43908104	rs3740983	G	T	0.192339	2.71449	ALKBH3	alkB homolog 3 alpha-ketoglutaratedependent dioxygenase	0.2318
11	43925440	rs11037726	A	T	0.186659	2.83406	ALKBH3	alkB homolog 3 alpha-ketoglutaratedependent dioxygenase	0.2379
11	112837269	rs12295969	C	G	0.174302	2.43901	NCAM1	neural cell adhesion molecule 1	0.4333
11	112838512	rs720024	T	C	0.169912	2.17722	NCAM1	neural cell adhesion molecule 1	0.4297
11	118538187	rs607527	T	G	0.196195	2.1994	TREH	trehalase	0.1455
11	118550756	rs642530	C	T	0.198054	2.1994	TREH	trehalase	0.1424
11	118552420	rs4936433	G	A	0.194279	2.1994	TREH	trehalase	0.1437
11	118555754	rs525485	A	G	0.210361	2.1994	TREH	trehalase	0.1424
12	30979116	rs10843843	C	T	0.196845	2.97108	LINC00941	long intergenic non-protein coding RNA 941	0.1091
12	30980440	rs16906853	T	C	0.171031	3.25293	LINC00941	long intergenic non-protein coding RNA 941	0.2409
12	30981288	rs11051099	T	C	0.206068	2.75104	LINC00941	long intergenic non-protein coding RNA 941	0.1869
12	30981978	rs33151	G	A	0.19854	2.75705	LINC00941	long intergenic non-protein coding RNA 941	0.1864
12	30982771	rs4931380	A	G	0.200339	2.75705	LINC00941	long intergenic non-protein coding RNA 941	0.1894
12	30983129	rs16906858	G	A	0.198052	2.75705	LINC00941	long intergenic non-protein coding RNA 941	0.1884
12	30983550	rs10492243	C	T	0.226346	4.11587	LINC00941	long intergenic non-protein coding RNA 941	0.2682
12	31009557	rs11612603	T	C	0.224918	3.94542	LINC00941	long intergenic non-protein coding RNA 941	0.2644
12	31038082	rs919211	A	T	0.243222	3.22424	TSPAN11	tetraspanin 11	0.1687
12	31054860	rs244504	G	A	0.182304	3.43224	TSPAN11	tetraspanin 11	0.1803
12	31055840	rs244503	C	G	0.248928	2.68625	TSPAN11	tetraspanin 11	0.1667
12	31063131	rs4931386	G	A	0.263985	2.8683	TSPAN11	tetraspanin 11	0.1717
12	31071897	rs10734794	C	T	0.207272	3.65796	TSPAN11	tetraspanin 11	0.2333
12	31073016	rs1485343	T	G	0.233105	4.02954	TSPAN11	tetraspanin 11	0.2879
12	31074862	rs7979386	C	T	0.178711	3.66679	TSPAN11	tetraspanin 11	0.2197
12	31410284	rs12423595	C	T	0.189477	2.36012	SINHCAF	SIN3-HDAC complex associated factor	0.2682
12	40724030	rs11176053	T	C	0.17578	3.58031	LRRK2	leucine rich repeat kinase 2	0.3455
12	41708862	rs7962357	A	T	0.229071	2.22707	PDZRN4	PDZ domain containing ring finger 4	0.1182
12	117225078	rs2088236	T	C	0.217377	2.31098	RNFT2	ring finger protein transmembrane 2	0.1167
13	111286546	rs7323602	T	G	0.186564	2.10473	NAXD	NAD(P)HX dehydratase	0.3803
16	31860399	rs12447780	T	C	0.204742	4.05763	VN1R3	vomeronasal 1 receptor 3 (gene/pseudogene)	0.1439
16	79690368	rs11150185	T	A	0.250353	2.34323	MAF	MAF bZIP transcription factor	0.2439
16	79692668	rs11150186	G	A	0.249548	2.24163	MAF	MAF bZIP transcription factor	0.2432
17	6398233	rs10852883	A	G	0.216628	2.44322	PITPNM3	PITPNM family member 3	0.1788
17	6404727	rs8064810	G	A	0.214716	2.53971	PITPNM3	PITPNM family member 3	0.1833
17	9104053	rs11652513	T	C	0.213488	2.20721	NTN1	netrin 1	0.2561
17	72523259	rs783250	T	C	0.182147	2.08948	CD300LB	CD300 molecule like family member b	0.2835
17	72527718	rs965229	A	G	0.173806	2.10674	CD300LB	CD300 molecule like family member b	0.2879
18	2516420	rs12970878	T	C	0.181007	2.36861	METTL4	methyltransferase like 4	0.4606
18	60781023	rs17070659	C	T	0.199867	2.96398	PHLPP1	PH domain y leucine rich repeat protein phosphatase 1	0.1879
20	24572046	rs6049798	T	A	0.211616	2.70315	SYNDIG1	synapse differentiation inducing 1	0.2197
20	24572331	rs4815280	A	T	0.211616	2.70315	SYNDIG1	synapse differentiation inducing 1	0.2182
20	24586383	rs12480522	G	T	0.174976	2.55811	SYNDIG1	synapse differentiation inducing 1	0.2197
20	24590332	rs12481129	T	C	0.177131	2.74835	SYNDIG1	synapse differentiation inducing 1	0.2158
20	24614231	rs4813525	C	T	0.238206	2.81882	SYNDIG1	synapse differentiation inducing 1	0.2
21	45239995	rs2186927	C	T	0.199147	2.1525	AATBC	apoptosis associated transcript in bladder cancer	0.3267
21	45240137	rs1573336	C	T	0.199147	2.1525	AATBC	apoptosis associated transcript in bladder cancer	0.3258
22	41844786	rs202657	G	T	0.197942	2.25346	PHF5A	PHD finger protein 5A	0.1652
22	41849513	rs202628	G	A	0.197942	2.25346	PHF5A	PHD finger protein 5A	0.1667
22	41850500	rs79008	A	G	0.211485	2.25346	PHF5A	PHD finger protein 5A	0.1662
22	41862288	rs5758368	T	C	0.192076	2.25346	PHF5A	PHD finger protein 5A	0.1692
22	41927700	rs1810460	T	C	0.179054	2.35006	POLR3H	RNA polymerase III subunit H	0.1697
22	41935912	rs4822035	A	G	0.170003	2.57797	POLR3H	RNA polymerase III subunit H	0.1727
22	42009520	rs132767	T	C	0.194314	2.19807	DESI1	desumoylating isopeptidase 1	0.1667
22	42107745	rs5751141	A	G	0.170958	2.08758	MEI1	meiotic double-stryed break formation protein 1	0.1727

## Sheet: Table S6
Table S6: Candidate genes under selection in the Southeast region
Chromosome	Hg37 position	rs	Reference Allele	Alternate Allele	PBS	iHS	Gene Symbol	Gene name	MAIS minor allele freq
1	4781151	rs3820251	T	C	0.174476	2.23044	AJAP1	adherens junctions associated protein 1	0.3439
1	5051305	rs7367766	G	T	0.249205	2.59409	AJAP1	adherens junctions associated protein 1	0.311
1	5061519	rs10158288	T	C	0.223571	2.33773	AJAP1	adherens junctions associated protein 1	0.3182
1	5065850	rs10915309	G	A	0.18454	2.4984	AJAP1	adherens junctions associated protein 1	0.3182
1	5080433	rs6689504	G	T	0.287309	2.60858	AJAP1	adherens junctions associated protein 1	0.31
1	6742281	rs156985	T	C	0.339804	2.2461	DNAJC11	DnaJ heat shock protein family (Hsp40) member C11	0.3318
1	6793240	rs441515	C	G	0.267333	2.18658	LINC01672	long intergenic non-protein coding RNA 1672	0.3182
1	6808354	rs277675	C	T	0.181071	3.00671	LINC01672	long intergenic non-protein coding RNA 1672	0.09848
1	6896285	rs1396904	G	T	0.196427	2.40995	CAMTA1	calmodulin binding transcription activator 1	0.2553
1	6922492	rs11120779	G	A	0.161716	2.61436	CAMTA1	calmodulin binding transcription activator 1	0.2712
1	6923726	rs1972306	C	T	0.196427	2.43672	CAMTA1	calmodulin binding transcription activator 1	0.2576
1	6924587	rs12406288	A	G	0.355345	2.65364	CAMTA1	calmodulin binding transcription activator 1	0.3
1	6960927	rs4908426	A	T	0.331493	2.72107	CAMTA1	calmodulin binding transcription activator 1	0.3
1	6976226	rs4908427	G	A	0.351401	2.57955	CAMTA1	calmodulin binding transcription activator 1	0.297
1	15031315	rs10803303	T	C	0.209153	2.24246	KAZN	kazrin periplakin interacting protein	0.3045
1	15039411	rs7516095	T	G	0.172158	2.4286	KAZN	kazrin periplakin interacting protein	0.3125
1	15044796	rs1883576	C	T	0.177155	2.41963	KAZN	kazrin periplakin interacting protein	0.3076
1	57547097	rs17114957	G	A	0.219471	2.12962	DAB1	DAB1 reelin adaptor protein	0.4803
1	58271285	rs11207111	A	C	0.208187	2.23958	DAB1	DAB1 reelin adaptor protein	0.304
1	58272916	rs12140411	G	A	0.251465	2.22303	DAB1	DAB1 reelin adaptor protein	0.3
1	58281264	rs852753	C	G	0.235167	2.09383	DAB1	DAB1 reelin adaptor protein	0.1322
1	72385095	rs3795700	T	C	0.220967	2.19532	NEGR1	neuronal growth regulator 1	0.2318
1	159553264	rs1955160	A	T	0.193785	2.61896	APCS	amyloid P component serum	0.4771
1	159559962	rs1900393	G	T	0.17435	2.45383	APCS	amyloid P component serum	0.4561
1	159564045	rs10494329	G	C	0.20041	2.59312	APCS	amyloid P component serum	0.4621
1	159567848	rs1037144	A	G	0.19942	2.59312	APCS	amyloid P component serum	0.459
1	159567922	rs1037145	C	T	0.206453	2.45429	APCS	amyloid P component serum	0.4561
1	166828464	rs4657608	C	T	0.324067	3.52673	TADA1	transcriptional adaptor 1	0.1682
1	166832125	rs2049910	C	T	0.25692	3.84287	TADA1	transcriptional adaptor 1	0.193
1	166911149	rs2312238	T	A	0.163513	2.43099	ILDR2	immunoglobulin like domain containing receptor 2	0.1125
1	167111293	rs11808527	T	C	0.208844	2.62254	DUSP27	dual specificity phosphatase 27 atypical	0.15
1	167124465	rs1532482	T	A	0.19268	2.68762	DUSP27	dual specificity phosphatase 27 atypical	0.153
1	167126942	rs873821	T	C	0.19268	2.66598	DUSP27	dual specificity phosphatase 27 atypical	0.1505
1	205468289	rs6681714	C	T	0.16349	3.71788	CDK18	cyclin dependent kinase 18	0.1611
1	210587818	rs4845015	G	A	0.194261	2.63858	HHAT	hedgehog acyltransferase	0.3076
1	210611882	rs910032	G	A	0.206019	2.57072	HHAT	hedgehog acyltransferase	0.3061
1	210620211	rs4845032	C	G	0.201484	2.51246	HHAT	hedgehog acyltransferase	0.3055
1	210620779	rs34549224	C	T	0.217347	2.55725	HHAT	hedgehog acyltransferase	0.304
1	217400809	rs4846403	C	T	0.233186	2.24101	GPATCH2	G-patch domain containing 2	0.4348
1	217501133	rs904217	T	C	0.22771	2.09519	GPATCH2	G-patch domain containing 2	0.4498
1	217506973	rs1032603	A	G	0.234908	2.06804	GPATCH2	G-patch domain containing 2	0.4394
1	241754836	rs655970	G	A	0.193426	2.52307	KMO	kynurenine 3-monooxygenase	0.2879
1	241755925	rs640718	G	A	0.25988	2.70645	KMO	kynurenine 3-monooxygenase	0.3424
1	241774286	rs16841877	T	C	0.208264	2.40738	OPN3	opsin 3	0.343
1	242350620	rs189779	T	C	0.200286	2.1132	PLD5	phospholipase D family member 5	0.3746
2	1437163	rs1473936	A	C	0.19124	2.2216	TPO	thyroid peroxidase	0.4773
2	36958374	rs6710234	C	T	0.210356	3.37464	VIT	vitrin	0.3613
2	36966349	rs10490662	C	T	0.211234	2.85205	VIT	vitrin	0.3667
2	36977116	rs12469652	G	A	0.207209	3.05782	VIT	vitrin	0.3697
2	36977577	rs10207138	T	C	0.191839	2.52947	VIT	vitrin	0.2652
2	36978749	rs10865116	A	G	0.171326	2.58357	VIT	vitrin	0.2621
2	36982752	rs2270321	C	T	0.171711	2.63684	VIT	vitrin	0.2636
2	42338486	rs17029230	G	A	0.188221	2.29475	PKDCC	protein kinase domain containing cytoplasmic	0.1809
2	42360831	rs7600992	T	C	0.25113	2.16082	PKDCC	protein kinase domain containing cytoplasmic	0.2939
2	143944581	rs354729	T	C	0.259435	2.38769	ARHGAP15	Rho GTPase activating protein 15	0.3374
2	143965332	rs10201629	A	G	0.259435	2.40164	ARHGAP15	Rho GTPase activating protein 15	0.3404
2	144040731	rs7579046	T	G	0.333672	2.35201	ARHGAP15	Rho GTPase activating protein 15	0.4091
2	144040750	rs7605182	C	A	0.333672	2.35201	ARHGAP15	Rho GTPase activating protein 15	0.403
2	144799194	rs9287357	G	C	0.169521	2.05705	GTDC1	glycosyltransferase like domain containing 1	0.4076
2	155303969	rs13032771	G	A	0.185218	2.26492	GALNT13	polypeptide N-acetylgalactosaminyltransferase 13	0.1365
2	155306752	rs707079	A	T	0.214592	2.15751	GALNT13	polypeptide N-acetylgalactosaminyltransferase 13	0.35
2	155308672	rs7582614	C	A	0.214592	2.28668	GALNT13	polypeptide N-acetylgalactosaminyltransferase 13	0.3526
2	163421321	rs981840	C	G	0.174904	2.26858	KCNH7	potassium voltage-gated channel subfamily H member 7	0.1727
2	163491296	rs4383352	G	C	0.169602	2.26858	KCNH7	potassium voltage-gated channel subfamily H member 7	0.1727
2	214861233	rs10498012	C	T	0.194603	2.64293	SPAG16	sperm associated antigen 16	0.1909
2	214862848	rs4673801	G	A	0.200238	2.58555	SPAG16	sperm associated antigen 16	0.1924
3	2160106	rs9842506	T	G	0.205915	2.90962	CNTN4	contactin 4	0.3742
3	2160472	rs17194126	T	C	0.203823	2.98952	CNTN4	contactin 4	0.3799
3	10941102	rs958469	C	A	0.326254	2.76238	SLC6A11	solute carrier family 6 member 11	0.2318
3	10953549	rs2581206	C	A	0.174397	2.68377	SLC6A11	solute carrier family 6 member 11	0.1128
3	10966588	rs4684746	G	A	0.224723	2.73935	SLC6A11	solute carrier family 6 member 11	0.1379
3	10968172	rs746278	C	A	0.22461	2.71841	SLC6A11	solute carrier family 6 member 11	0.1429
3	11004257	rs7642251	A	G	0.204139	2.96641	SLC6A11	solute carrier family 6 member 11	0.1576
3	11016323	rs751960	G	A	0.2	2.96641	SLC6A11	solute carrier family 6 member 11	0.1565
3	11017443	rs1728810	G	T	0.202115	2.33131	SLC6A11	solute carrier family 6 member 11	0.1576
3	12426936	rs10510419	T	G	0.176463	2.09064	PPARG	peroxisome proliferator activated receptor gamma	0.4803
3	12468589	rs13099828	G	C	0.217139	2.08566	PPARG	peroxisome proliferator activated receptor gamma	0.4697
3	12471330	rs6782475	G	T	0.211081	2.08566	PPARG	peroxisome proliferator activated receptor gamma	0.4696
3	12475088	rs7626560	T	C	0.220781	2.37472	PPARG	peroxisome proliferator activated receptor gamma	0.4558
3	12478817	rs9833097	A	G	0.181079	2.87172	PPARG	peroxisome proliferator activated receptor gamma	0.4544
3	12494794	rs2249407	C	A	0.197622	2.3921	PPARG	peroxisome proliferator activated receptor gamma	0.4318
3	48381992	rs12633519	A	G	0.170135	2.08443	FBXW12	F-box y WD repeat domain containing 12	0.4136
3	55003733	rs881820	T	G	0.211882	2.09001	CACNA2D3	calcium voltage-gated channel auxiliary subunit alpha2delta 3	0.1364
3	55007881	rs2222072	C	A	0.210074	2.10789	CACNA2D3	calcium voltage-gated channel auxiliary subunit alpha2delta 3	0.1333
3	84987578	rs12489817	T	C	0.186873	2.40549	CADM2	cell adhesion molecule 2	0.4088
3	122694400	rs895074	T	C	0.196749	2.23009	SEMA5B	semaphorin 5B	0.2879
3	122695288	rs7432970	A	G	0.196107	2.23009	SEMA5B	semaphorin 5B	0.2879
3	139723808	rs987193	G	A	0.179499	2.52557	CLSTN2	calsyntenin 2	0.4027
3	139805080	rs1316806	T	A	0.161687	2.20521	CLSTN2	calsyntenin 2	0.3924
3	191024206	rs9808988	A	G	0.174146	2.4952	UTS2B	urotensin 2B	0.2644
4	21555307	rs16871393	C	A	0.255013	2.71258	KCNIP4	potassium voltage-gated channel interacting protein 4	0.2576
4	21562372	rs17482780	T	A	0.165976	2.14682	KCNIP4	potassium voltage-gated channel interacting protein 4	0.2227
4	36328939	rs16992066	G	A	0.177519	2.12075	DTHD1	death domain containing 1	0.3576
4	84941806	rs4129090	T	C	0.20656	2.09755	LOC101928978	uncharacterized LOC101928978	0.2455
4	84950278	rs1921886	C	A	0.168018	2.21656	LOC101928978	uncharacterized LOC101928978	0.2439
4	84952657	rs1921884	C	T	0.218737	2.34076	LOC101928978	uncharacterized LOC101928978	0.2258
4	84958919	rs1921879	A	T	0.254528	2.35027	LOC101928978	uncharacterized LOC101928978	0.2317
4	84962653	rs1921877	T	C	0.17233	2.19955	LOC101928978	uncharacterized LOC101928978	0.2273
4	84988602	rs12498826	C	G	0.169414	2.12005	LOC101928978	uncharacterized LOC101928978	0.2136
4	85012075	rs1882389	G	A	0.298643	2.4739	LOC101928978	uncharacterized LOC101928978	0.2167
4	85012426	rs2868869	G	T	0.298643	2.4739	LOC101928978	uncharacterized LOC101928978	0.2136
4	85013971	rs1921859	C	T	0.173494	2.11804	LOC101928978	uncharacterized LOC101928978	0.2121
4	85014233	rs2868870	T	C	0.171501	2.11804	LOC101928978	uncharacterized LOC101928978	0.2121
4	85024378	rs2868872	G	T	0.298643	2.55593	LOC101928978	uncharacterized LOC101928978	0.2167
4	85025087	rs17008116	A	C	0.171501	2.4087	LOC101928978	uncharacterized LOC101928978	0.2121
4	85029517	rs7684739	T	C	0.173494	2.4087	LOC101928978	uncharacterized LOC101928978	0.2121
4	85033914	rs1921854	C	T	0.16572	2.32655	LOC101928978	uncharacterized LOC101928978	0.2076
4	85039106	rs4380513	C	T	0.16572	2.32655	LOC101928978	uncharacterized LOC101928978	0.2061
4	85043820	rs41486746	A	G	0.289379	2.4957	LOC101928978	uncharacterized LOC101928978	0.2106
4	85056919	rs17008164	C	G	0.291932	2.4957	LOC101928978	uncharacterized LOC101928978	0.2106
4	85057124	rs17008168	A	G	0.289379	2.4957	LOC101928978	uncharacterized LOC101928978	0.2106
4	85066641	rs10516709	G	A	0.291932	2.50019	LOC101928978	uncharacterized LOC101928978	0.2106
4	85070169	rs1921892	A	C	0.291932	2.4957	LOC101928978	uncharacterized LOC101928978	0.2106
4	85072631	rs2178604	A	T	0.16572	2.32659	LOC101928978	uncharacterized LOC101928978	0.2061
4	85078337	rs10516714	G	A	0.16572	2.32659	LOC101928978	uncharacterized LOC101928978	0.2061
4	89730986	rs17014602	G	C	0.375313	2.08286	FAM13A	family with sequence similarity 13 member A	0.4258
4	178915050	rs1462513	T	G	0.198228	2.54113	LINC01098	long intergenic non-protein coding RNA 1098	0.1697
4	178922743	rs2378808	A	T	0.188421	2.69329	LINC01098	long intergenic non-protein coding RNA 1098	0.1717
5	59278969	rs17315957	T	C	0.240908	2.13815	PDE4D	phosphodieastrase 4D	0.31
5	59569008	rs7714765	A	G	0.177041	2.59591	PDE4D	phosphodieastrase 4D	0.3
5	59627575	rs4349679	G	C	0.195077	2.44751	PDE4D	phosphodieastrase 4D	0.253
5	60827969	rs16892251	T	C	0.178088	2.10622	ZSWIM6	zinc finger SWIM-type containing 6	0.453
5	80472887	rs1020721	A	G	0.169341	3.23291	RASGRF2	Ras protein specific guanine nucleotide releasing factor 2	0.3773
5	127693525	rs32238	G	T	0.236618	2.7709	FBN2	fibrillin 2	0.303
5	127707075	rs331096	G	A	0.206695	2.88464	FBN2	fibrillin 2	0.3136
5	150290146	rs2086120	G	A	0.170366	2.8021	ZNF300	zinc finger protein 300	0.1235
5	150313198	rs1531543	C	A	0.173198	2.81203	ZNF300P1	zinc finger protein 300 pseudogene 1	0.1227
5	150326976	rs6882830	A	G	0.173198	2.77804	ZNF300P1	zinc finger protein 300 pseudogene 1	0.1277
5	150331654	rs7720289	A	G	0.173198	2.81916	ZNF300P1	zinc finger protein 300 pseudogene 1	0.1258
5	150387493	rs707144	G	A	0.219157	2.30522	ZNF300P1	zinc finger protein 300 pseudogene 1	0.1201
5	150390517	rs707149	A	G	0.206769	2.65313	ZNF300P1	zinc finger protein 300 pseudogene 1	0.1212
5	153087153	rs12523051	A	G	0.183849	2.17464	GRIA1	glutamate ionotropic receptor AMPA type subunit 1	0.3045
5	153797277	rs7710430	T	C	0.172977	3.41544	GALNT10	polypeptide N-acetylgalactosaminyltransferase 10	0.2197
5	153991222	rs1975985	G	A	0.165181	3.35497	MIR1303	microRNA 1303	0.2667
6	10206722	rs6926380	T	C	0.218277	2.45291	OFCC1	orofacial cleft 1 cyidate 1	0.4379
6	24111617	rs1419230	T	C	0.218424	2.10604	NRSN1	neurensin 1	0.3727
6	24112370	rs1361890	T	G	0.218424	2.10604	NRSN1	neurensin 1	0.3727
6	50803050	rs987237	G	A	0.205831	2.69918	TFAP2B	transcription factor AP-2 beta	0.3404
6	114240685	rs352092	T	C	0.248988	2.61406	FLJ34503	uncharacterized FLJ34503	0.4333
6	116754277	rs3213531	G	A	0.232737	2.67115	DSE	dermatan sulfate epimerase	0.4258
6	116820735	rs12526587	C	A	0.170063	2.31183	TRAPPC3L	trafficking protein particle complex 3 like	0.4136
7	19757731	rs10239591	T	C	0.183911	2.11963	TWISTNB	TWIST neighbor	0.4818
7	23794029	rs4722266	A	G	0.230304	2.2657	STK31	serine/threonine kinase 31	0.3424
7	103977242	rs2106504	T	A	0.283379	2.14368	LHFPL3	LHFPL tetraspan subfamily member 3	0.2303
7	103990382	rs6958831	G	T	0.216709	2.62398	LHFPL3	LHFPL tetraspan subfamily member 3	0.2416
7	103997924	rs10240925	T	C	0.264321	2.09846	LHFPL3	LHFPL tetraspan subfamily member 3	0.2249
7	143719697	rs11543722	A	C	0.189011	2.30889	OR2A5	olfactory receptor family 2 subfamily A member 5	0.2204
8	27101279	rs3739214	T	C	0.195538	2.72918	STMN4	stathmin 4	0.3636
8	30854392	rs9987093	G	A	0.163456	2.49977	PURG	purine rich element binding protein G	0.45
8	87617188	rs9297935	C	T	0.16271	3.1691	CNGB3	cyclic nucleotide gated channel beta 3	0.2015
8	128999640	rs4733812	A	G	0.21714	2.41233	PVT1	Pvt1 oncogene	0.1463
8	130232692	rs4733683	T	G	0.25614	2.22157	LINC00977	long intergenic non-protein coding RNA 977	0.1773
8	132739778	rs12541606	T	G	0.200413	2.42836	EFR3A	EFR3 homolog A	0.4347
8	132766258	rs16904516	C	T	0.192621	2.37739	EFR3A	EFR3 homolog A	0.4271
8	132842020	rs12541773	G	A	0.278167	2.45792	EFR3A	EFR3 homolog A	0.4242
8	143359064	rs3923080	C	T	0.209497	2.0531	TSNARE1	t-SNARE domain containing 1	0.2879
8	143664312	rs3934486	G	A	0.300633	2.49351	ARC	activity regulated cytoskeleton associated protein	0.4924
8	143676026	rs4977021	T	C	0.299329	2.53461	ARC	activity regulated cytoskeleton associated protein	0.4954
9	8361136	rs10511493	T	A	0.272414	2.16478	PTPRD	protein tyrosine phosphatase receptor type D	0.147
9	8361934	rs12552493	T	C	0.236056	2.17552	PTPRD	protein tyrosine phosphatase receptor type D	0.1113
9	8362230	rs20514	T	G	0.166488	2.23394	PTPRD	protein tyrosine phosphatase receptor type D	0.1894
9	14495337	rs16931853	A	G	0.161452	2.11732	NFIB	nuclear factor I B	0.4288
9	18358128	rs7047314	A	G	0.169725	2.15086	SH3GL2	SH3 domain containing GRB2 like 2 endophilin A1	0.1717
9	18362865	rs10511652	A	G	0.201062	2.14837	ADAMTSL1	ADAMTS like 1	0.1733
9	18364503	rs7020284	T	C	0.198463	2.41673	ADAMTSL1	ADAMTS like 1	0.1839
9	86319414	rs17080575	C	T	0.213519	2.06465	UBQLN1	ubiquilin 1	0.1652
9	86490594	rs7869387	G	A	0.179456	2.47833	KIF27	kinesin family member 27	0.1804
9	86611036	rs754144	T	C	0.177546	2.8211	RMI1	RecQ mediated genome instability 1	0.1758
9	86693470	rs2118166	T	C	0.187415	3.19638	LOC101927575	uncharacterized LOC101927575	0.3207
9	90319414	rs3118860	T	C	0.16112	2.70404	DAPK1	death associated protein kinase 1	0.2076
9	90327095	rs3128499	A	G	0.183736	2.57995	CTSL	cathepsin L	0.1864
9	117669270	rs3827818	C	T	0.166423	2.6478	TNFSF8	TNF superfamily member 8	0.4788
9	117679730	rs3789878	G	C	0.184285	2.6478	TNFSF8	TNF superfamily member 8	0.4711
9	119098876	rs12378619	C	T	0.244782	3.68282	PAPPA	pappalysin 1	0.3298
9	124980026	rs10985568	C	T	0.264079	2.34149	LHX6	LIM homeobox 6	0.3963
9	135185355	rs744133	G	A	0.249744	2.30148	SETX	senataxin	0.424
9	135559249	rs10901198	C	T	0.175928	2.68079	GTF3C4	general transcription factor IIIC subunit 4	0.353
10	72730811	rs827265	A	G	0.172232	2.65896	UNC5B	unc-5 netrin receptor B	0.4758
10	73192608	rs7069945	T	C	0.184294	2.87186	CDH23	cadherin related 23	0.4545
10	81017467	rs1250530	C	T	0.250402	2.12804	ZMIZ1	zinc finger MIZ-type containing 1	0.4451
10	118959013	rs3847483	C	T	0.167823	2.21785	KCNK18	potassium two pore domain channel subfamily K member 18	0.4333
10	118959363	rs17095821	C	T	0.167823	2.44346	KCNK18	potassium two pore domain channel subfamily K member 18	0.4347
10	118967460	rs363313	G	A	0.167823	2.52293	KCNK18	potassium two pore domain channel subfamily K member 18	0.4318
10	118973145	rs3858335	C	A	0.167823	2.28575	KCNK18	potassium two pore domain channel subfamily K member 18	0.4333
10	118973556	rs17095891	G	A	0.167823	2.28575	KCNK18	potassium two pore domain channel subfamily K member 18	0.4333
11	6736745	rs7130858	A	G	0.23888	2.46604	GVINP1	GTPase very large interferon inducible pseudogene 1	0.2242
11	6755642	rs12223054	T	A	0.240209	2.70466	GVINP1	GTPase very large interferon inducible pseudogene 1	0.2249
11	6768655	rs10839610	G	A	0.309119	2.45503	GVINP1	GTPase very large interferon inducible pseudogene 1	0.2188
11	6773439	rs7928685	C	T	0.31861	2.49851	OR2AG2	olfactory receptor family 2 subfamily AG member 2	0.2158
11	19120159	rs1125217	C	G	0.178716	2.45844	MRGPRX2	MAS related GPR family member X2	0.1636
11	40318617	rs11035770	C	T	0.187592	2.45539	LRRC4C	leucine rich repeat containing 4C	0.4424
11	43908104	rs3740983	G	T	0.252766	2.84837	ALKBH3	alkB homolog 3 alpha-ketoglutaratedependent dioxygenase	0.2318
11	43925440	rs11037726	A	T	0.243297	3.19729	ALKBH3	alkB homolog 3 alpha-ketoglutaratedependent dioxygenase	0.2379
11	44101559	rs178528	A	C	0.178619	2.10617	ACCS	1-aminocyclopropane-1-carboxylate synthase homolog (inactive)	0.08537
11	44363600	rs4755813	T	C	0.1771	2.97813	ALX4	ALX homeobox 4	0.2712
11	88139680	rs16913902	T	C	0.186817	2.58389	CTSC	cathepsin C	0.3
11	112071294	rs12420140	G	A	0.211375	2.33982	BCO2	beta-carotene oxygenase 2	0.3727
11	112218097	rs4937300	T	C	0.179718	2.07061	LOC283140	uncharacterized LOC283140	0.3936
11	117732806	rs10892187	A	G	0.165202	2.52806	FXYD6	FXyD domain containing ion transport regulator 6	0.3333
12	26366307	rs765071	G	A	0.16334	2.74664	SSPN	sarcospan	0.2742
12	26585578	rs7955049	G	A	0.181377	3.88441	ITPR2	inositol 145-trisphosphate receptor type 2	0.2553
12	30979116	rs10843843	C	T	0.181141	2.74747	LINC00941	long intergenic non-protein coding RNA 941	0.1091
12	30980440	rs16906853	T	C	0.164159	3.03145	LINC00941	long intergenic non-protein coding RNA 941	0.2409
12	30981288	rs11051099	T	C	0.198999	2.73644	LINC00941	long intergenic non-protein coding RNA 941	0.1869
12	30981978	rs33151	G	A	0.189998	2.62876	LINC00941	long intergenic non-protein coding RNA 941	0.1864
12	30982771	rs4931380	A	G	0.191729	2.62876	LINC00941	long intergenic non-protein coding RNA 941	0.1894
12	30983129	rs16906858	G	A	0.188567	2.62876	LINC00941	long intergenic non-protein coding RNA 941	0.1884
12	30983550	rs10492243	C	T	0.23358	3.21982	LINC00941	long intergenic non-protein coding RNA 941	0.2682
12	31009557	rs11612603	T	C	0.215195	3.84325	LINC00941	long intergenic non-protein coding RNA 941	0.2644
12	31038082	rs919211	A	T	0.248475	2.84402	TSPAN11	tetraspanin 11	0.1687
12	31054860	rs244504	G	A	0.178739	3.1353	TSPAN11	tetraspanin 11	0.1803
12	31055840	rs244503	C	G	0.243606	2.66613	TSPAN11	tetraspanin 11	0.1667
12	31063131	rs4931386	G	A	0.264871	2.65717	TSPAN11	tetraspanin 11	0.1717
12	31071897	rs10734794	C	T	0.194604	3.47445	TSPAN11	tetraspanin 11	0.2333
12	31073016	rs1485343	T	G	0.194661	3.58504	TSPAN11	tetraspanin 11	0.2879
12	32457665	rs261871	C	T	0.177968	2.49261	BICD1	BICD cargo adaptor 1	0.4409
12	32480056	rs261889	A	G	0.16577	2.22501	BICD1	BICD cargo adaptor 1	0.4212
12	40724030	rs11176053	T	C	0.224628	2.07469	LRRK2	leucine rich repeat kinase 2	0.3455
12	41708862	rs7962357	A	T	0.208761	2.30389	PDZRN4	PDZ domain containing ring finger 4	0.1182
12	54114923	rs2077285	C	A	0.202769	2.64788	CALCOCO1	calcium binding y coiled-coil domain 1	0.4223
12	113209185	rs2384035	G	A	0.167892	2.49896	RPH3A	rabphilin 3A	0.3207
13	30303093	rs1359859	C	T	0.2679	2.21915	UBL3	ubiquitin like 3	0.2152
13	95762005	rs9561784	G	A	0.224153	2.11777	ABCC4	ATP binding cassette subfamily C member 4	0.2073
13	109866000	rs11617943	C	A	0.230159	2.65028	MYO16	myosin XVI	0.25
13	109879099	rs1328837	A	G	0.238188	2.63101	MYO16	myosin XVI	0.2485
13	109883183	rs1328835	C	G	0.262221	2.63601	MYO16	myosin XVI	0.247
14	63140996	rs4899090	G	A	0.204451	2.13088	KCNH5	potassium voltage-gated channel subfamily H member 5	0.4179
14	103249676	rs941726	C	T	0.185374	2.11619	TRAF3	TNF receptor associated factor 3	0.2136
15	36868554	rs11073182	C	T	0.175389	2.43001	C15orf41	chromosome 15 open reading frame 41	0.1818
15	36879892	rs12101796	A	G	0.184193	2.29876	C15orf41	chromosome 15 open reading frame 41	0.1839
15	40251741	rs8041785	G	A	0.170592	2.73414	EIF2AK4	eukaryotic translation initiation factor 2 alpha kinase 4	0.1601
15	52463485	rs12595160	C	A	0.184615	2.91178	GNB5	G protein subunit beta 5	0.4848
15	52901977	rs2414166	A	G	0.171285	2.62298	FAM214A	family with sequence similarity 214 member A	0.3758
15	52959687	rs1863512	A	G	0.168892	2.82115	FAM214A	family with sequence similarity 214 member A	0.3773
16	31860399	rs12447780	T	C	0.203575	2.54765	VN1R3	vomeronasal 1 receptor 3 (gene/pseudogene)	0.1439
16	34602945	rs17723574	G	C	0.209172	2.96841	LINC01566	long intergenic non-protein coding RNA 1566	0.2212
16	79690368	rs11150185	T	A	0.289058	3.27959	MAF	MAF bZIP transcription factor	0.2439
16	79691318	rs7184694	C	T	0.231273	2.43268	MAF	MAF bZIP transcription factor	0.2061
16	79692668	rs11150186	G	A	0.293616	3.00532	MAF	MAF bZIP transcription factor	0.2432
17	78184393	rs7503034	T	C	0.179698	2.13064	SGSH	N-sulfoglucosamine sulfohydrolase	0.2258
17	78192414	rs6565649	A	G	0.237372	2.18598	SGSH	N-sulfoglucosamine sulfohydrolase	0.221
17	78193252	rs6565651	C	T	0.237674	2.14795	SGSH	N-sulfoglucosamine sulfohydrolase	0.2138
18	2516420	rs12970878	T	C	0.180008	2.18734	METTL4	methyltransferase like 4	0.4606
18	2517992	rs1517608	G	A	0.212239	2.24869	METTL4	methyltransferase like 4	0.4727
18	2521311	rs8090642	G	A	0.214359	2.0772	METTL4	methyltransferase like 4	0.4788
18	30061838	rs12968086	A	T	0.214006	2.45788	GAREM1	GRB2 associated regulator of MAPK1 subtype 1	0.4281
18	60781023	rs17070659	C	T	0.197628	2.4043	PHLPP1	PH domain y leucine rich repeat protein phosphatase 1	0.1879
20	24557888	rs6114780	G	A	0.196045	2.64912	SYNDIG1	synapse differentiation inducing 1	0.2939
20	24567367	rs6036843	A	C	0.220521	2.90029	SYNDIG1	synapse differentiation inducing 1	0.2325
20	24572046	rs6049798	T	A	0.27901	2.45125	SYNDIG1	synapse differentiation inducing 1	0.2197
20	24572331	rs4815280	A	T	0.27901	2.45125	SYNDIG1	synapse differentiation inducing 1	0.2182
20	24586383	rs12480522	G	T	0.307739	2.33215	SYNDIG1	synapse differentiation inducing 1	0.2197
20	24590332	rs12481129	T	C	0.304828	2.41088	SYNDIG1	synapse differentiation inducing 1	0.2158
20	24614231	rs4813525	C	T	0.291615	2.78739	SYNDIG1	synapse differentiation inducing 1	0.2
20	54090626	rs17001256	G	T	0.164285	2.27756	CBLN4	cerebellin 4 precursor	0.4061
20	54259052	rs6069367	C	T	0.170021	2.93604	CBLN4	cerebellin 4 precursor	0.3924
21	15659254	rs1013001	A	G	0.165501	2.29098	ABCC13	ATP binding cassette subfamily C member 13 (pseudogene)	0.1869
21	15659550	rs1012999	G	A	0.176731	2.65561	ABCC13	ATP binding cassette subfamily C member 13 (pseudogene)	0.3186
21	27884497	rs222921	A	G	0.171352	2.72776	CYYR1	cysteine y tyrosine rich 1	0.2742
21	45226304	rs6518323	G	A	0.170993	2.29757	AATBC	apoptosis associated transcript in bladder cancer	0.397
22	41071659	rs133063	C	T	0.331327	2.24268	MCHR1	melanin concentrating hormone receptor 1	0.114
22	41813886	rs202664	C	T	0.295821	2.2065	TEF	TEF PAR bZIP transcription factor	0.1672
22	41844786	rs202657	G	T	0.232966	2.26083	PHF5A	PHD finger protein 5A	0.1652
22	41849513	rs202628	G	A	0.232966	2.26083	PHF5A	PHD finger protein 5A	0.1667
22	41850500	rs79008	A	G	0.253299	2.26083	PHF5A	PHD finger protein 5A	0.1662
22	41862288	rs5758368	T	C	0.22474	2.26083	PHF5A	PHD finger protein 5A	0.1692
22	41927700	rs1810460	T	C	0.205581	2.42699	POLR3H	RNA polymerase III subunit H	0.1697
22	41935912	rs4822035	A	G	0.192608	2.88565	POLR3H	RNA polymerase III subunit H	0.1727
22	42009520	rs132767	T	C	0.201706	2.37424	DESI1	desumoylating isopeptidase 1	0.1667
22	42107745	rs5751141	A	G	0.192261	2.20811	MEI1	meiotic double-stryed break formation protein 1	0.1727
22	42150146	rs1534932	C	T	0.206061	2.18886	MEI1	meiotic double-stryed break formation protein 1	0.1687
22	42202606	rs4820444	A	G	0.17913	2.10883	CCDC134	coiled-coil domain containing 134	0.1682
22	42356886	rs6002560	C	T	0.167253	2.13189	LINC00634	long intergenic non-protein coding RNA 634	0.4258
22	42367837	rs916440	G	A	0.219687	2.12219	LINC00634	long intergenic non-protein coding RNA 634	0.4343

## Sheet: Table S7
Table S7: Genes found under selection in one or several regions
Intersections/Region	N common genes	Shared genes
Center+North+Northwest+South+Southeast	2	PPARG, AJAP1
Center+North+Northwest+South	1	KCNQ3
North+Northwest+South+Southeast	1	FLJ34503
Center+Northwest+South+Southeast	5	SYNDIG1, DNAJC11, EFR3A, PURG, ARHGAP15
North+Northwest+Southeast	1	GAREM1
North+South+Southeast	3	FBN2, STMN4, DUSP27
Center+Northwest+South	1	SINHCAF
Northwest+South+Southeast	2	PLD5, GVINP1
Center+South+Southeast	16	TSPAN11, SLC6A11, PTPRD, PKDCC, DAB1, CNTN4, LINC01672, LINC00941, SETX, LHFPL3, CAMTA1, LRRK2, TADA1, CTSL, DAPK1, PAPPA
North+Northwest	7	RAF1, KRT36, KRT13, TRPM1, LINC00635, LINC00458, TMTC2
Center+North	5	PIK3CG, CAMK1G, NELL2, PRDM1, RUNX2
North+Southeast	6	GNB5, UBL3, PDE4D, FAM13A, CACNA2D3, CTSC
Center+Northwest	4	CRACR2A, TBX4, BRIP1, CHD6
Northwest+Southeast	3	OR2AG2, GALNT13, LOC283140
Center+South	4	ID3, PTGFRN, RNFT2, NCAM1
Center+Southeast	14	UBQLN1, OFCC1, RMI1, LINC01566, GRIA1, UTS2B, MCHR1, TNFSF8, KIF27, ALX4, KAZN, APCS, TFAP2B, CBLN4
South+Southeast	28	LINC01098, PHF5A, VIT, ARC, LINC00977, METTL4, MEI1, ZMIZ1, DSE, LOC101928978, MAF, OPN3, KMO, SH3GL2, DESI1, ZNF300, AATBC, ALKBH3, GTF3C4, MRGPRX2, CLSTN2, ADAMTSL1, PDZRN4, VN1R3, ZNF300P1, KCNIP4, POLR3H, PHLPP1
North	136	IL17A, LINC01492, KIF26B, OSBPL11, MPDZ, MOGS, OR6A2, CMTM8, LOC339468, SPCS3, ADAMTS18, TTC13, ASXL3, CTBP2, TLL2, LOXL4, PPP1R16B, FAM234B, DLG2, SIGLEC5, ZMYM2, MKRN2OS, TRAM2, LINC01777, SLC12A8, AKR1C4, LINC00927, F13A1, MAB21L4, TTC31, MN1, LINC01530, FCER1A, LMNTD1, ATXN1, CDH13, CHSY1, LEUTX, SEMA4F, AK5, TG, LIPJ, SUPT3H, KLF7, FHIT, LINC02397, PLCB1, GPC5, ATP9A, TCF20, KC6, CLC, GPR176…
Northwest	126	ZDHHC14, TMEM171, LINC00332, SEC14L6, LOC101929315, DCDC1, UBE2Z, ZC3H13, KCNJ6, BYSL, IYD, COL4A1, CASP5, KCNG1, MAP1B, LINC01060, MIR146A, SLC1A3, SULT1E1, PIEZO2, GRAMD1B, ANKS1B, ITIH5, NTM, RGS6, ERG, UQCRFS1, WWTR1, BUD13, TGFBR3, LINC00536, MAP3K7, KLHDC4, LINC02492, NEUROD6, SYN3, ATAD2B, ZPR1, LINC01377, ASCL2, MARCH10, PRKCB, CACUL1, SEC14L4, CASP1, VPS26A, CARD17, GJD4, MYH10, RNF216, …
Center	74	ZHX3, RTEL1, EIF2AK1, SGPP2, LINC01476, ABCG2, ANXA6, CD300C, NLRP1, MYH14, DRD2, LOC100506532, LIPC, SPSB1, CCDC50, MYOM1, DCLK2, N4BP1, GRIN2B, NOS1, RPL35, TENM4, AGBL4, CPNE5, OLFM4, PLCG1, XXYLT1, CASC15, OVOS2, AXIN2, SREK1, NCKAP5L, CPE, CHST1, HSPD1, SPATA3, LINC01179, FLI1, TNFRSF19, FANCE, GRIA4, LINC00559, GAP43, PRICKLE1, AMMECR1L, DOK6, OSTN, GPC6, LRRC30, STMN3, SF3B1, QPCT, LOC7301…
South	15	GJA1, XKR9, PITPNM3, HTR1B, SLC6A1, IRGM, NAXD, C1orf94, NTN1, CD300LB, CD86, CNTNAP2, OLFM1, TREH, CSRP3
Southeast	53	CDK18, ACCS, SGSH, FAM214A, FBXW12, MIR1303, CDH23, SEMA5B, DTHD1, ILDR2, FXYD6, UNC5B, OR2A5, SSPN, C15orf41, BCO2, CCDC134, BICD1, SPAG16, KCNH7, LINC00634, NFIB, NEGR1, TWISTNB, KCNK18, ABCC13, ZSWIM6, CYYR1, LRRC4C, STK31, CADM2, PVT1, NRSN1, TRAF3, RASGRF2, CNGB3, ITPR2, TSNARE1, LHX6, TPO, CALCOCO1, GTDC1, LOC101927575, GPATCH2, TRAPPC3L, MYO16, GALNT10, RPH3A, TEF, HHAT, ABCC4, KCNH5, EIF2…

## Sheet: Table S8
Table S8: Functional enrichments in the network using Human Phenotype Ontology (Monarch initiative) in North region
Term ID	Term description	Observed gene count	Background gene count	Strength	False discovery rate	Matching proteins in the network
EFO:0004870	Sleep measurement	25	870	0.6	3.06e-05	ASIC2, EGLN3, CDH13, ASXL3, LACTB2, KLF7, CTBP2, PLCB1, PDE4D, AK5, ZNF536, NPAS3, TCF20, VAV3, DLG2, GPC5, AJAP1, ARHGAP24, KIF26B, SDK1, TMEM132D, FHIT, CACNA2D3, FBN2, KCTD16
GO:0050896	Response to stimulus	28	1055	0.56	3.06e-05	TG, ASIC2, EGLN3, CDH13, ASXL3, ADAMTS18, ZHX2, IL17F, PLCB1, PDE4D, ZNF536, NPAS3, FCER1A, VAV3, ZCCHC6, DLG2, PRUNE2, GPC5, PIK3CD, ARHGAP24, CTNNA2, KIF26B, TMEM132D, FHIT, CACNA2D3, STMN2, TRPM1, PKIB
EFO:0004324	Body weights y measures	60	4126	0.3	4.09e-05	RCN1, TRAM2, KIAA1467, ASIC2, ATXN1, RAF1, CHSY1, LOXL4, MYO5C, PIK3C3, CCNE1, FAM13A, CDH13, ASXL3, GAREM, UXS1, TSEN2, PPARG, TRIM9, MN1, CMTM8, KLF7, CTBP2, ZHX2, DIS3L2, CACNB2, TMEM40, RNLS, PLCB1, ATP9A, PDE4D, AK5, ZNF536, NPAS3, TCF20, TTC13, VAV3, EFHC1, RUNX2, SUPT3H, ZCCHC6, DLG2, PRUNE2, GPC5, AJAP1, AKR1C4, KCNQ3, ARHGAP24, MATN3, CTNNA2, ARSG, NELL2, FHIT, CACNA2D3, FBN2, MPDZ, GPR1…
EFO:0004302	Anthropometric measurement	61	4307	0.29	5.87e-05	RCN1, TRAM2, KIAA1467, ASIC2, ATXN1, RAF1, CHSY1, LOXL4, MYO5C, PIK3C3, CCNE1, FAM13A, CDH13, ASXL3, GAREM, UXS1, TSEN2, PPARG, TRIM9, MN1, CMTM8, KLF7, CTBP2, ZHX2, DIS3L2, CACNB2, TMEM40, RNLS, PLCB1, ATP9A, PDE4D, AK5, ZNF536, NPAS3, TCF20, TTC13, VAV3, EFHC1, RUNX2, SUPT3H, ZCCHC6, DLG2, PSAT1, PRUNE2, GPC5, AJAP1, AKR1C4, KCNQ3, ARHGAP24, MATN3, CTNNA2, ARSG, NELL2, FHIT, CACNA2D3, FBN2, MPD…
EFO:0004464	Brain measurement	27	1177	0.5	0.00023	ASIC2, STX6, FAM13A, F13A1, CDH13, LACTB2, FSIP1, ADAMTS18, CTBP2, CACNB2, TMTC2, PLCB1, PDE4D, ZNF536, NPAS3, TCF20, RUNX2, SUPT3H, DLG2, SLC12A8, CTNNA2, KIF26B, ARSG, TMEM132D, FHIT, CACNA2D3, FBN2
EFO:0006930	Brain volume measurement	18	612	0.61	0.0011	ASIC2, STX6, FAM13A, F13A1, CDH13, CTBP2, CACNB2, TMTC2, PLCB1, PDE4D, NPAS3, TCF20, RUNX2, DLG2, KIF26B, ARSG, TMEM132D, FHIT
GO:0042493	Response to drug	22	898	0.53	0.0011	TG, ASIC2, EGLN3, CDH13, ADAMTS18, ZHX2, PLCB1, PDE4D, ZNF536, FCER1A, VAV3, DLG2, PRUNE2, GPC5, CTNNA2, KIF26B, TMEM132D, FHIT, CACNA2D3, STMN2, TRPM1, PKIB
EFO:0000408	Disease	29	1529	0.42	0.0018	WISP1, EGLN3, RAF1, CHSY1, CDH13, KCNH1, LACTB2, ADAMTS18, PPARG, PPP1R16B, CTBP2, CACNB2, PTPRB, PLCB1, AK5, EFHC1, DLG2, PRUNE2, GPC5, KCTD1, CTNNA2, KIF26B, SDK1, TMEM232, FHIT, FBN2, TRPM1, GPR176, SYN2
EFO:0004339	Body height	35	2089	0.36	0.0018	TRAM2, KIAA1467, ASIC2, RAF1, CHSY1, LOXL4, PIK3C3, CCNE1, CDH13, ASXL3, GAREM, PPARG, CMTM8, CTBP2, ZHX2, DIS3L2, RNLS, ATP9A, PDE4D, ZNF536, NPAS3, TTC13, EFHC1, RUNX2, SUPT3H, DLG2, KCNQ3, ARHGAP24, MATN3, ARSG, FHIT, CACNA2D3, FBN2, GPR176, ZMYM2
EFO:0007015	3-hydroxy-1-methylpropylmercapturic acid measurement	8	105	1.02	0.0018	TG, ASIC2, EGLN3, CDH13, PLCB1, RUNX2, ARSG, CACNA2D3
EFO:0004557	Population measurement	17	611	0.58	0.0022	ASIC2, ATXN1, CDH13, CTBP2, TMTC2, IL17F, PLCB1, ZNF536, NPAS3, TLL2, RUNX2, DLG2, CTNNA2, NELL2, CACNA2D3, FBN2, ZMYM2
EFO:0007874	Gut microbiome measurement	15	488	0.63	0.0026	ASIC2, ATXN1, CDH13, CTBP2, TMTC2, PLCB1, ZNF536, NPAS3, TLL2, DLG2, CTNNA2, NELL2, CACNA2D3, FBN2, ZMYM2
EFO:0004784	Self reported educational attainment	22	1006	0.48	0.0027	ASIC2, ATXN1, CDH13, ASXL3, KCNH1, PPARG, PPP1R16B, CACNB2, RNLS, PLCB1, PDE4D, AK5, ZNF536, NPAS3, TCF20, DLG2, GPC5, CTNNA2, SDK1, FHIT, CACNA2D3, KCTD16
EFO:0004731	Eye measurement	19	803	0.51	0.004	TRAM2, ATXN1, EGLN3, CHSY1, FAM13A, UXS1, CTBP2, RNLS, NPAS3, EFHC1, RUNX2, SUPT3H, DLG2, KCTD1, TMEM132D, FHIT, CACNA2D3, FBN2, TRPM1
EFO:0004340	Body mass index	24	1263	0.42	0.0082	RCN1, ASIC2, LOXL4, PIK3C3, CCNE1, CDH13, ASXL3, PPARG, TRIM9, KLF7, CTBP2, CACNB2, PLCB1, AK5, ZNF536, NPAS3, TCF20, SUPT3H, ZCCHC6, DLG2, CTNNA2, FHIT, ZMYM2, SYN2
EFO:0000719	Temporal measurement	25	1356	0.4	0.0083	ASIC2, STX6, FAM13A, F13A1, CDH13, KCNH1, PPARG, CTBP2, RNLS, IL17F, PLCB1, PDE4D, NPAS3, RUNX2, DLG2, KCNQ3, ARHGAP24, CTNNA2, SDK1, LMNTD1, FHIT, CACNA2D3, GABRA2, FBN2, TRPM1
EFO:0004730	Hormone measurement	27	1535	0.38	0.0083	TRAM2, ASIC2, RAF1, FAM13A, CDH13, KCNH1, PPARG, PPP1R16B, TSPAN17, KIAA1551, PLCB1, PDE4D, ZNF536, NPAS3, VAV3, EFHC1, ZCCHC6, ISCA1, DLG2, AKR1C4, ARHGAP24, MYO5A, KIF26B, SDK1, FHIT, FBN2, SYN2
GO:0097327	Response to antineoplastic agent	7	106	0.96	0.0083	CDH13, ADAMTS18, PLCB1, ZNF536, PRUNE2, GPC5, TMEM132D
EFO:0004747	Protein measurement	66	5855	0.19	0.0111	RCN1, TRAM2, KIAA1467, TG, ASIC2, CTSC, ATXN1, WISP1, EGLN3, RAF1, FAT2, MYO5C, FAM13A, CDH13, GAREM, KCNH1, CPO, LACTB2, ADAMTS18, UXS1, PPARG, PPP1R16B, MN1, KLF7, KIAA1551, CTBP2, DIS3L2, CACNB2, TMTC2, MIEF1, RNLS, PLCB1, PDE4D, AK5, ZNF536, NPAS3, TCF20, SMG5, TTC13, PRDM1, SH3BGRL2, VAV3, EFHC1, RUNX2, SUPT3H, ISCA1, DLG2, GPC5, AKR1C4, KCNQ3, SLC12A8, MYO5A, CTNNA2, KIF26B, SDK1, TMEM232, …
EFO:0003892	Pulmonary function measurement	23	1222	0.41	0.0116	TRAM2, TG, ASIC2, FAM13A, CDH13, ASXL3, FSIP1, MN1, PLCB1, ATP9A, PDE4D, TCF20, VAV3, EFHC1, RUNX2, SUPT3H, DLG2, GPC5, CTNNA2, FHIT, CACNA2D3, GABRA2, HYOU1
EFO:0007821	Hair morphology measurement	14	515	0.57	0.0116	CTSC, ATXN1, RAF1, FAM13A, RNLS, PDE4D, ZNF536, PRDM1, RUNX2, SUPT3H, ARHGAP24, KCTD1, CACNA2D3, MPDZ
EFO:0007841	Facial morphology measurement	10	264	0.72	0.0116	ADAMTS18, UXS1, ZNF536, RUNX2, SUPT3H, DLG2, SDK1, TMEM132D, FHIT, CACNA2D3
EFO:0006995	Response to diisocyanate	6	80	1.01	0.0135	ASXL3, NPAS3, ZCCHC6, PIK3CD, ARHGAP24, TMEM132D
EFO:0006933	Pallidum volume	3	10	1.62	0.0352	DLG2, ARSG, TMEM132D
HP:0000118	Phenotypic abnormality	58	5134	0.19	0.039	TG, ASIC2, CTSC, MOGS, ATXN1, KRT13, RAF1, CHSY1, FAT2, GNB5, FAM13A, F13A1, CDH13, ASXL3, KCNH1, ADAMTS18, TSEN2, PPARG, TRIM9, TRIM44, MN1, KLF7, CTBP2, DIS3L2, CACNB2, RNLS, IL17F, PLCB1, PDE4D, AK5, ZNF536, NPAS3, TCF20, VAV3, RUNX2, ISCA1, DLG2, PSAT1, GPC5, PIK3CD, AJAP1, XK, AKR1C4, ADRA1A, KCNQ3, MYO5A, MATN3, KCTD1, CTNNA2, SDK1, ARSG, TMEM132D, FHIT, CACNA2D3, GABRA2, FBN2, TRPM1, MPDZ
EFO:0000246	Age	16	746	0.47	0.0409	STX6, FAM13A, F13A1, CDH13, KCNH1, PPARG, CTBP2, RNLS, PLCB1, PDE4D, NPAS3, DLG2, SDK1, CACNA2D3, GABRA2, TRPM1
EFO:0004873	Cytokine measurement	12	448	0.57	0.0409	ASIC2, ATXN1, DIS3L2, PDE4D, TCF20, DLG2, KCNQ3, CTNNA2, TMEM132D, FHIT, CACNA2D3, FBN2
EFO:0005116	Urinary metabolite measurement	11	388	0.59	0.0471	TG, ASIC2, CTSC, EGLN3, CDH13, PLCB1, AK5, NPAS3, RUNX2, ARSG, CACNA2D3

## Sheet: Table S9
Table S9: Functional enrichments in the network using Human Phenotype Ontology (Monarch initiative) in Northwest region
Term ID	Term description	Observed gene count	Background gene count	Strength	False discovery rate	Matching proteins in the network
EFO:0003892	Pulmonary function measurement	31	1222	0.57	2.33e-06	TGFBR3, ATAD2B, TBX4, KALRN, BRIP1, BUD13, MECOM, SLC1A3, JPH3, RBMS1, ARHGAP15, PRKCB, PSG11, SYN3, PARD3B, ZDHHC14, PPP1R14C, KLHL32, PRKG1, LPAR1, COL4A1, LINGO2, BNC2, GALNT13, GRK5, CALN1, NTM, VGLL4, WWTR1, PIEZO2, KCNJ6
EFO:0006841	Respiratory disease biomarker	30	1151	0.58	2.33e-06	TGFBR3, ATAD2B, TBX4, KALRN, BRIP1, BUD13, MECOM, SLC1A3, JPH3, RBMS1, ARHGAP15, PRKCB, PSG11, PLB1, SYN3, PARD3B, ZDHHC14, PPP1R14C, KLHL32, LPAR1, COL4A1, LINGO2, BNC2, GALNT13, NTM, VGLL4, WWTR1, PIEZO2, PLD5, KCNJ6
EFO:0000408	Disease	31	1529	0.47	0.00014	ATAD2B, RAF1, BRIP1, BUD13, MECOM, JPH3, PPARG, ARHGAP15, MERTK, PRKCB, NADSYN1, ZNF804B, STARD13, TRIM29, SYN3, PARD3B, PPP1R14C, MAP3K7, KCNG1, CHD6, ABCA1, COL4A1, LINGO2, BNC2, CALN1, COL4A3, PIEZO2, TRPM1, ANKS1B, TTC8, TCTN3
EFO:0004302	Anthropometric measurement	56	4307	0.28	0.00052	TGFBR3, ZPR1, ATAD2B, TBX4, RAF1, ELP3, DAB2IP, MECOM, SLC1A3, GAREM, ZC3H13, JPH3, PPARG, RBMS1, ARHGAP15, NELL1, FAM134C, ZNF804B, FAM60A, STARD13, KIAA1671, SYN3, PARD3B, ZDHHC14, UBE2Z, ADCK3, LHPP, CACUL1, KLHL32, CHD6, PRKG1, LPAR1, ABCA1, CARD16, COL4A1, DNAJC11, AJAP1, LINGO2, BNC2, KCNQ3, EPHA6, GALNT13, GRK5, CALN1, RELN, NTM, VGLL4, ERG, TMEM171, PURG, WWTR1, SNF8, CASP1, ANKS1B, GPR13…
EFO:0004324	Body weights and measures	54	4126	0.28	0.00067	TGFBR3, ZPR1, ATAD2B, TBX4, RAF1, ELP3, DAB2IP, MECOM, SLC1A3, GAREM, ZC3H13, JPH3, PPARG, RBMS1, ARHGAP15, NELL1, FAM134C, ZNF804B, FAM60A, STARD13, SYN3, PARD3B, UBE2Z, ADCK3, LHPP, CACUL1, KLHL32, CHD6, PRKG1, LPAR1, ABCA1, CARD16, COL4A1, DNAJC11, AJAP1, LINGO2, BNC2, KCNQ3, EPHA6, GALNT13, GRK5, CALN1, RELN, NTM, VGLL4, ERG, TMEM171, PURG, WWTR1, SNF8, CASP1, ANKS1B, GPR139, KCNJ6
EFO:0004512	Bone measurement	37	2300	0.37	0.00077	TGFBR3, SULT1E1, ATAD2B, TBX4, RAF1, DAB2IP, BUD13, MECOM, SLC1A3, PPARG, RBMS1, ARHGAP15, MERTK, NELL1, PRKCB, TMTC2, PLB1, KIAA1671, SYN3, PARD3B, UBE2Z, PRKG1, ABCA1, CARD16, COL4A1, VSX1, LINGO2, BNC2, DCDC1, GRAMD1B, VGLL4, FAM19A1, SNF8, CASP1, ANKS1B, RGS6, KCNJ6
EFO:0004340	Body mass index	25	1263	0.46	0.0021	ZPR1, ELP3, JPH3, PPARG, RBMS1, ARHGAP15, NELL1, ZNF804B, FAM60A, STARD13, PARD3B, KLHL32, PRKG1, CARD16, DNAJC11, LINGO2, BNC2, GALNT13, CALN1, RELN, NTM, VGLL4, PURG, ANKS1B, GPR139
EFO:0009776	Ornithine measurement	4	10	1.77	0.0021	MECOM, NELL1, ZNF804B, FAM19A1
EFO:0004529	Lipid measurement	32	1959	0.38	0.0029	TGFBR3, ZPR1, RAF1, BUD13, GAREM, SLC2A13, PPARG, RBMS1, NELL1, UGT2B7, PRKCB, FAM134C, TMTC2, ZNF804B, SYN3, PARD3B, CHD6, PRKG1, LPAR1, ABCA1, LINGO2, BNC2, KCNQ3, CALN1, SEC14L6, RELN, NTM, WWTR1, PIEZO2, PLD5, ANKS1B, KCNJ6
EFO:0004303	Vital signs	24	1265	0.44	0.0046	ZPR1, KALRN, DAB2IP, BUD13, MECOM, GAREM, TMEM87B, ARHGAP15, MERTK, UGT2B7, PLB1, KLHL32, PRKG1, COL4A1, AJAP1, LINGO2, EPHA6, COL4A3, DCDC1, ERG, PIEZO2, TRPM1, ANKS1B, RGS6
EFO:0004557	Population measurement	16	611	0.58	0.0046	ZPR1, TBX4, EFR3A, MECOM, RBMS1, PRKCB, TMTC2, ADCK3, LHPP, CHD6, BNC2, TECRL, DCDC1, ERG, PLD5, ANKS1B
EFO:0004713	FEV/FEC ratio	17	679	0.56	0.0046	TGFBR3, TBX4, KALRN, BUD13, MECOM, SLC1A3, RBMS1, ARHGAP15, PRKCB, SYN3, PARD3B, KLHL32, COL4A1, BNC2, NTM, VGLL4, WWTR1
EFO:0004747	Protein measurement	65	5855	0.21	0.0046	TGFBR3, SULT1E1, ZPR1, BYSL, ATAD2B, KALRN, RAF1, ELP3, BRIP1, DAB2IP, BUD13, MECOM, SLC1A3, GAREM, SLC2A13, ZC3H13, PPARG, RBMS1, ARHGAP15, MERTK, NELL1, UGT2B7, PRKCB, TMTC2, FAM60A, STARD13, ENOSF1, SYN3, PARD3B, ADCK3, CREG1, CHD6, VPS26A, NDUFA8, PRKG1, ABCA1, COL4A1, VSX1, SYNDIG1, HSPA14, LINGO2, BNC2, KCNQ3, EPHA6, GALNT13, GRK5, TTLL6, ITIH5, SEC14L6, PSG2, DCDC1, RELN, NTM, VGLL4, CRACR…
EFO:0003923	Bone density	21	1040	0.47	0.0056	TGFBR3, SULT1E1, TBX4, DAB2IP, BUD13, MECOM, SLC1A3, PPARG, ARHGAP15, MERTK, NELL1, TMTC2, PLB1, KIAA1671, SYN3, PRKG1, LINGO2, BNC2, DCDC1, GRAMD1B, FAM19A1
EFO:0004298	Cardiovascular measurement	35	2382	0.33	0.0056	TGFBR3, ZPR1, KALRN, RAF1, DAB2IP, BUD13, MECOM, GAREM, SLC2A13, PPARG, ARHGAP15, NELL1, UGT2B7, PLB1, SYN3, PPP1R14C, ADCK3, CHD6, VPS26A, PRKG1, ABCA1, COL4A1, LINGO2, KCNQ3, TTLL6, COL4A3, SEC14L6, DCDC1, RELN, NTM, ERG, TMEM171, ANKS1B, RGS6, KCNJ6
EFO:0007874	Gut microbiome measurement	14	488	0.62	0.0056	TBX4, MECOM, RBMS1, PRKCB, TMTC2, ADCK3, LHPP, CHD6, BNC2, TECRL, DCDC1, ERG, PLD5, ANKS1B
EFO:0004339	Body height	32	2089	0.35	0.0057	TGFBR3, ATAD2B, RAF1, ELP3, DAB2IP, MECOM, SLC1A3, GAREM, ZC3H13, JPH3, PPARG, RBMS1, ARHGAP15, STARD13, SYN3, UBE2Z, LHPP, CHD6, PRKG1, LPAR1, LINGO2, BNC2, KCNQ3, GRK5, RELN, NTM, VGLL4, ERG, TMEM171, PURG, WWTR1, ANKS1B
EFO:0004464	Brain measurement	22	1177	0.44	0.009	TBX4, KALRN, MECOM, SLC2A13, JPH3, TMTC2, ZNF804B, PLB1, PARD3B, ZDHHC14, LPAR1, ABCA1, CARD16, CARD17, COL4A1, BNC2, ITIH5, DCDC1, RELN, NTM, FAM19A1, RGS6
EFO:0005132	5-HIAA measurement	4	20	1.47	0.009	COL4A3, VGLL4, PIEZO2, ANKS1B
EFO:0008354	Cognitive function measurement	16	672	0.54	0.009	ATAD2B, KALRN, MECOM, TMEM87B, PPARG, ARHGAP15, PARD3B, KLHL32, CHD6, ZWINT, BNC2, RNF216, GALNT13, CALN1, NTM, PURG
EFO:0006930	Brain volume measurement	15	612	0.55	0.0101	TBX4, MECOM, SLC2A13, JPH3, TMTC2, ZNF804B, PARD3B, LPAR1, ABCA1, COL4A1, ITIH5, DCDC1, RELN, FAM19A1, RGS6
EFO:0004516	Bone fracture related measurement	23	1294	0.41	0.0104	TGFBR3, SULT1E1, ATAD2B, TBX4, DAB2IP, BUD13, MECOM, SLC1A3, PPARG, ARHGAP15, MERTK, NELL1, PRKCB, TMTC2, PLB1, KIAA1671, SYN3, PRKG1, LINGO2, BNC2, DCDC1, GRAMD1B, FAM19A1
GO:0050896	Response to stimulus	20	1055	0.44	0.0144	TGFBR3, ZPR1, EFR3A, MECOM, NELL1, LASP1, KIAA1671, PARD3B, ZDHHC14, PPP1R14C, CARD16, BNC2, GALNT13, RELN, GRAMD1B, PIEZO2, TRPM1, PLD5, ANKS1B, KCNJ6
EFO:0000618	Nervous system disease	11	354	0.66	0.0145	MECOM, JPH3, TRIM29, SYN3, KCNG1, CHD6, ABCA1, COL4A1, COL4A3, TRPM1, ANKS1B
EFO:0004731	Eye measurement	17	803	0.49	0.0145	ATAD2B, KALRN, MECOM, MERTK, MAP1B, TRIM29, SYN3, PARD3B, LPAR1, COL4A1, TECRL, COL4A3, DCDC1, NTM, VGLL4, TRPM1, PLD5
EFO:0005671	Smoking behaviour measurement	15	652	0.53	0.0164	MECOM, RBMS1, ARHGAP15, PSG11, ZNF804B, PPP1R14C, CARD16, AJAP1, BNC2, GRK5, CALN1, DCDC1, NTM, ANKS1B, KCNJ6
EFO:0007710	Cognitive decline measurement	7	139	0.87	0.0204	PRKCB, LASP1, CHD6, PRKG1, ABCA1, KCNQ3, RELN
EFO:0004725	Metabolite measurement	19	1038	0.43	0.0305	ZPR1, BUD13, ARHGAP15, NELL1, UGT2B7, ENOSF1, LHPP, ABCA1, LINGO2, BNC2, TECRL, COL4A3, DCDC1, RELN, VGLL4, TMEM171, PIEZO2, IDO2, ANKS1B
EFO:0005278	Cardiovascular disease biomarker measurement	31	2232	0.31	0.0305	TGFBR3, ZPR1, KALRN, RAF1, DAB2IP, BUD13, GAREM, SLC2A13, PPARG, ARHGAP15, NELL1, UGT2B7, PLB1, PPP1R14C, ADCK3, CHD6, PRKG1, ABCA1, COL4A1, LINGO2, KCNQ3, TTLL6, COL4A3, SEC14L6, DCDC1, RELN, NTM, ERG, ANKS1B, RGS6, KCNJ6
EFO:0000508	Genetic disorder	10	332	0.64	0.0346	BRIP1, MECOM, PRKCB, NADSYN1, SYN3, ABCA1, COL4A3, PIEZO2, TTC8, TCTN3
EFO:0009270	Heel bone mineral density	17	880	0.45	0.0357	TGFBR3, SULT1E1, TBX4, DAB2IP, MECOM, SLC1A3, PPARG, ARHGAP15, MERTK, TMTC2, PLB1, KIAA1671, SYN3, PRKG1, BNC2, DCDC1, GRAMD1B
EFO:0009336	Velopharyngeal dysfunction	4	34	1.23	0.0357	PPP1R14C, COL4A1, BNC2, CRACR2A
EFO:0004314	Forced expiratory volume	10	338	0.64	0.0366	ATAD2B, MECOM, JPH3, RBMS1, PSG11, PPP1R14C, KLHL32, LPAR1, GALNT13, PIEZO2
EFO:0005852	Heschls gyrus morphology measurement	3	13	1.53	0.0411	KALRN, ZNF804B, BNC2

## Sheet: Table S10
Table S10: Functional enrichments in the network using Human Phenotype Ontology (Monarch initiative) in Center region
Term ID	Term description	Observed gene count	Background gene count	Strength	False discovery rate	Matching proteins in the network
EFO:0004464	Brain measurement	29	1177	0.61	6.25e-07	ABCG2, TBX4, RNFT2, TENM4, TIAM1, PKDCC, RFTN2, CAMTA1, ZHX3, PAPPA, ALX4, EYA2, SGCD, UTS2B, PRICKLE1, RTEL1, DRD2, DAB1, RUNX2, AGBL4, KAZN, PTPRD, CCDC129, CNTN6, OFCC1, FBXL7, GRIN2B, NOS1, NCAM1
GO:0050896	Response to stimulus	25	1055	0.6	1.84e-05	KCNQ1, ABCG2, SLC6A11, EFR3A, TIAM1, DCLK2, CAMTA1, ZHX3, SPSB1, ALX4, EYA2, SGCD, DAB1, AGBL4, KAZN, PTPRD, CNTN4, DAPK1, CNTN6, FBXL7, GRIA1, GRIN2B, NOS1, NCAM1, EPHA5
EFO:0006930	Brain volume measurement	19	612	0.72	1.91e-05	ABCG2, TBX4, RNFT2, CAMTA1, PAPPA, ALX4, EYA2, SGCD, UTS2B, PRICKLE1, RTEL1, DRD2, DAB1, RUNX2, AGBL4, PTPRD, FBXL7, GRIN2B, NOS1
EFO:0004870	Sleep measurement	22	870	0.63	2.4e-05	OLFM4, PLCG1, TENM4, RFTN2, ARHGAP15, LRRK2, LIPC, CAMTA1, ZHX3, SGCD, MYOM1, DRD2, DAB1, KAZN, GPC6, AJAP1, PTPRD, CNTN4, DAPK1, OFCC1, GRIA1, EPHA5
EFO:0004302	Anthropometric measurement	52	4307	0.31	0.00011	KCNQ1, ABCG2, TBX4, PLCG1, SGSM3, COQ10B, TENM4, TIAM1, PPARG, RFTN2, ARHGAP15, KIF27, LIPC, AXIN2, DCLK2, CAMTA1, XXYLT1, ZHX3, RMI1, SPSB1, PAPPA, EYA2, SF3B1, FAM60A, NCKAP5L, SGCD, PRICKLE1, MKL1, RTEL1, DAB1, RUNX2, AGBL4, CHD6, KAZN, GPC6, DNAJC11, AJAP1, PTPRD, KCNQ3, CCDC50, TFAP2B, CNTN4, CPE, SPATA3, LHFPL3, CNTN6, NELL2, PURG, GRIA1, FLI1, GRIN2B, NCAM1
GO:0042493	Response to drug	21	898	0.59	0.00014	ABCG2, EFR3A, TIAM1, DCLK2, CAMTA1, ZHX3, SPSB1, ALX4, EYA2, SGCD, DAB1, AGBL4, KAZN, PTPRD, CNTN4, DAPK1, GRIA1, GRIN2B, NOS1, NCAM1, EPHA5
EFO:0004557	Population measurement	17	611	0.67	0.00023	TBX4, PLCG1, SLC6A11, EFR3A, TENM4, LIPC, SGCD, RUNX2, CHD6, PTPRD, DOK6, CNTN4, DAPK1, CNTN6, NELL2, GRIA1, NCAM1
EFO:0004324	Body weights y measures	49	4126	0.3	0.00038	KCNQ1, ABCG2, TBX4, PLCG1, SGSM3, TENM4, TIAM1, PPARG, RFTN2, ARHGAP15, KIF27, LIPC, AXIN2, DCLK2, CAMTA1, XXYLT1, ZHX3, RMI1, SPSB1, PAPPA, EYA2, SF3B1, FAM60A, NCKAP5L, SGCD, PRICKLE1, MKL1, DAB1, RUNX2, AGBL4, CHD6, KAZN, GPC6, DNAJC11, AJAP1, PTPRD, KCNQ3, CCDC50, TFAP2B, CNTN4, CPE, SPATA3, LHFPL3, NELL2, PURG, GRIA1, FLI1, GRIN2B, NCAM1
EFO:0000719	Temporal measurement	25	1356	0.49	0.00044	KCNQ1, EFR3A, TSPAN11, ANKRD44, GRIA4, TIAM1, PPARG, CAMTA1, EYA2, SGCD, RTEL1, DAB1, RUNX2, KAZN, GPC6, DNAJC11, PTPRD, KCNQ3, TFAP2B, PURG, GRIA1, GRIN2B, NLRP1, NCAM1, EPHA5
HP:0000118	Phenotypic abnormality	56	5134	0.26	0.00044	KCNQ1, SETX, FANCE, TBX4, BRIP1, RPL35, N4BP1, TNFRSF8, TENM4, GRIA4, TIAM1, PPARG, PKDCC, ARHGAP15, LRRK2, LIPC, AXIN2, DCLK2, CAMTA1, ZHX3, MOB4, SPSB1, PAPPA, ALX4, EYA2, SF3B1, SGCD, PRICKLE1, RTEL1, KIAA1279, DAB1, RUNX2, CHD6, KAZN, SYNDIG1, GPC6, AJAP1, XK, PTPRD, DOK6, HSPD1, KCNQ3, PTGFRN, TFAP2B, GAP43, LHFPL3, ANXA11, CNTN6, CRACR2A, OFCC1, FBXL7, FLI1, MYH14, GRIN2B, NOS1, NLRP1
EFO:0006841	Respiratory disease biomarker	22	1151	0.5	0.0011	FANCE, TBX4, SLC6A11, BRIP1, TSPAN11, GRIA4, TIAM1, ARHGAP15, CAMTA1, SGCD, MKL1, RUNX2, AGBL4, PTPRD, CNTN4, DAPK1, LHFPL3, ANXA11, OFCC1, FBXL7, GRIA1, GRIN2B
EFO:0007006	Depressive symptom measurement	10	230	0.86	0.0013	KCNQ1, OLFM4, GRIA4, ZHX3, DRD2, GPC6, CNTN6, GRIN2B, NOS1, NCAM1
EFO:0008354	Cognitive function measurement	16	672	0.6	0.0022	CAMK1G, GRIA4, PPARG, ARHGAP15, KIF27, CAMTA1, MKL1, AGBL4, CHD6, DOK6, TFAP2B, CNTN4, LHFPL3, PURG, GRIA1, EPHA5
EFO:0006848	Mental or behavioural disorder biomarker	26	1634	0.43	0.0025	KCNQ1, OLFM4, KLB, TENM4, GRIA4, ARHGAP15, CAMTA1, ZHX3, SGCD, DRD2, DAB1, AGBL4, CHD6, KAZN, UBQLN1, GPC6, PTPRD, DOK6, CNTN4, LHFPL3, CNTN6, CRACR2A, GRIA1, GRIN2B, NOS1, NCAM1
EFO:0004340	Body mass index	22	1263	0.46	0.0038	KCNQ1, ABCG2, PLCG1, PPARG, RFTN2, ARHGAP15, LIPC, CAMTA1, XXYLT1, FAM60A, NCKAP5L, MKL1, DAB1, AGBL4, KAZN, DNAJC11, PTPRD, TFAP2B, CNTN4, PURG, GRIA1, NCAM1
EFO:0004784	Self reported educational attainment	19	1006	0.5	0.0052	OLFM4, TENM4, GRIA4, PPARG, ARHGAP15, CAMTA1, SF3B1, MKL1, DRD2, DAB1, PTPRD, TFAP2B, CNTN4, LHFPL3, PURG, GRIA1, GRIN2B, NCAM1, EPHA5
EFO:0004875	Mathematical ability	16	731	0.56	0.0052	TENM4, GRIA4, ARHGAP15, CAMTA1, EYA2, MKL1, DRD2, DAB1, PTPRD, TFAP2B, CNTN4, LHFPL3, PURG, GRIN2B, NCAM1, EPHA5
EFO:0004346	Neuroimaging measurement	11	349	0.72	0.0053	ABCG2, PKDCC, RFTN2, ZHX3, PAPPA, ALX4, DAB1, RUNX2, CNTN4, CNTN6, FBXL7
EFO:0004298	Cardiovascular measurement	31	2382	0.34	0.0098	KCNQ1, OLFM4, ABCG2, PLCG1, CPNE5, KLB, TSPAN11, GRIA4, PPARG, ARHGAP15, LRRK2, LIPC, CAMTA1, ZHX3, EYA2, SGCD, MKL1, DRD2, DAB1, RUNX2, CHD6, KAZN, GPC6, PTPRD, KCNQ3, CNTN4, LHFPL3, CNTN6, OFCC1, GRIA1, NCAM1
EFO:0004303	Vital signs	21	1265	0.44	0.0098	KCNQ1, PLCG1, CPNE5, TENM4, ARHGAP15, LIPC, CAMTA1, ZHX3, SGCD, RTEL1, AGBL4, KAZN, GPC6, AJAP1, PTPRD, CNTN4, DAPK1, LHFPL3, CNTN6, GRIN2B, NCAM1
EFO:0010101	Decreased susceptibility to hepatitis c infection	3	8	1.8	0.0141	PTPRD, PTGFRN, OFCC1
EFO:0003892	Pulmonary function measurement	20	1222	0.44	0.017	FANCE, TBX4, SLC6A11, BRIP1, TSPAN11, GRIA4, ARHGAP15, CAMTA1, EYA2, SGCD, RUNX2, AGBL4, PTPRD, CNTN4, CPE, DAPK1, OFCC1, FBXL7, GRIA1, GRIN2B
EFO:0000246	Age	15	746	0.53	0.0172	ANKRD44, GRIA4, TIAM1, PPARG, CAMTA1, EYA2, SGCD, RTEL1, DAB1, GPC6, DNAJC11, PTPRD, TFAP2B, GRIN2B, EPHA5
EFO:0006842	Diabetes mellitus biomarker	14	658	0.55	0.0172	KCNQ1, ABCG2, PLCG1, TENM4, PPARG, LIPC, ZHX3, EYA2, FAM60A, SGCD, KIAA1279, AGBL4, CRACR2A, MYH14
EFO:0007874	Gut microbiome measurement	12	488	0.61	0.0172	TBX4, SLC6A11, TENM4, LIPC, SGCD, CHD6, PTPRD, DOK6, CNTN4, DAPK1, CNTN6, NELL2
EFO:0004949	Clinical temporal measurement	9	278	0.73	0.0184	EFR3A, TSPAN11, CAMTA1, SGCD, RUNX2, PTPRD, PURG, GRIA1, NLRP1
EFO:0005272	Sleep quality	4	31	1.33	0.0184	TENM4, GPC6, DAPK1, OFCC1
EFO:0004468	Glucose measurement	12	520	0.59	0.0251	KCNQ1, ABCG2, PLCG1, TENM4, PPARG, LIPC, ZHX3, FAM60A, SGCD, KIAA1279, CRACR2A, MYH14
EFO:0004873	Cytokine measurement	11	448	0.61	0.0287	TENM4, ANKRD44, AXIN2, DAB1, KAZN, KCNQ3, CNTN4, DAPK1, CNTN6, CRACR2A, GRIN2B
EFO:0008393	Reaction time measurement	8	235	0.76	0.031	CAMK1G, KIF27, CAMTA1, AGBL4, CHD6, DOK6, LHFPL3, GRIA1
EFO:0005278	Cardiovascular disease biomarker measurement	28	2232	0.32	0.033	KCNQ1, OLFM4, ABCG2, PLCG1, CPNE5, KLB, TSPAN11, GRIA4, PPARG, ARHGAP15, LRRK2, LIPC, CAMTA1, ZHX3, EYA2, SGCD, DRD2, DAB1, CHD6, KAZN, GPC6, PTPRD, KCNQ3, LHFPL3, CNTN6, OFCC1, GRIA1, NCAM1
EFO:0003925	Cognition	20	1328	0.4	0.0359	OLFM4, TENM4, GRIA4, RFTN2, ARHGAP15, CAMTA1, EYA2, SF3B1, MKL1, DRD2, DAB1, PTPRD, TFAP2B, CNTN4, DAPK1, LHFPL3, PURG, GRIN2B, NCAM1, EPHA5
EFO:0005105	Lipid or lipoprotein measurement	27	2150	0.32	0.0402	OLFM4, ABCG2, PLCG1, SGSM3, TENM4, PPARG, KIF27, LRRK2, LIPC, DCLK2, CAMTA1, ZHX3, RMI1, EYA2, SGCD, DRD2, DAB1, CHD6, KAZN, PTPRD, KCNQ3, CNTN4, OFCC1, FBXL7, GRIA1, GRIN2B, NCAM1
HP:0001574	Abnormality of the integument	28	2269	0.31	0.0402	SETX, FANCE, BRIP1, RPL35, TNFRSF8, PPARG, PKDCC, ARHGAP15, LIPC, AXIN2, MOB4, SPSB1, ALX4, EYA2, SF3B1, SGCD, PRICKLE1, RTEL1, KIAA1279, RUNX2, KAZN, SYNDIG1, GPC6, KCNQ3, TFAP2B, FLI1, GRIN2B, NLRP1
HP:0012638	Abnormal nervous system physiology	35	3153	0.27	0.0402	KCNQ1, SETX, FANCE, BRIP1, RPL35, TENM4, GRIA4, PPARG, PKDCC, LRRK2, DCLK2, CAMTA1, SPSB1, ALX4, SGCD, PRICKLE1, RTEL1, KIAA1279, DAB1, RUNX2, KAZN, GPC6, XK, PTPRD, HSPD1, KCNQ3, TFAP2B, GAP43, LHFPL3, ANXA11, FBXL7, MYH14, GRIN2B, NOS1, NLRP1
EFO:0004311	Heart function measurement	14	749	0.49	0.0435	KCNQ1, PLCG1, CPNE5, LIPC, CAMTA1, ZHX3, DAB1, CHD6, KAZN, PTPRD, KCNQ3, LHFPL3, CNTN6, NCAM1
EFO:0009749	Age at first sexual intercourse measurement	6	135	0.87	0.0479	GRIA4, ARHGAP15, CAMTA1, DAB1, PTPRD, NCAM1
HP:0000707	Abnormality of the nervous system	37	3470	0.25	0.0479	KCNQ1, SETX, FANCE, BRIP1, RPL35, TENM4, GRIA4, PPARG, PKDCC, LRRK2, DCLK2, CAMTA1, SPSB1, ALX4, SGCD, PRICKLE1, RTEL1, KIAA1279, DAB1, RUNX2, KAZN, GPC6, AJAP1, XK, PTPRD, HSPD1, KCNQ3, TFAP2B, GAP43, LHFPL3, ANXA11, CNTN6, FBXL7, MYH14, GRIN2B, NOS1, NLRP1

[truncated: 8 more sheets: Table S11, Table S12, Table S13, Table S14, Table S15, Table S16, Table S17, Table S18]
